# Supplementary material for: Highly acidic N-triflylphosphoramides as chiral Brønsted acid catalysts: the effect of weak hydrogen bonds and multiple acceptors on complex structures and aggregation
Source: Royal Society of Chemistry journal article supplement (doi:10.1039/d4sc01939c), 2024-01-01
Supplement: d4sc01939c1.pdf [file d4sc01939c1.pdf]

# Highly Acidic *N*-Triflylphosphoramides as Chiral Brønsted Acid Catalysts: The Effect of Weak Hydrogen Bonds and Multiple Acceptors on Complex Structures and Aggregation

Markus Hecht,<sup>a</sup> Philipp Dullinger<sup>b</sup>, Wagner Silva<sup>a</sup>, Dominik Horinek<sup>b</sup> and Ruth M. Gschwind\*<sup>a</sup>

---

<sup>a</sup> *Institut für Organische Chemie, Universität Regensburg, D-93053 Regensburg, Germany. E-mail: ruth.gschwind@chemie.uni-regensburg.de*

<sup>b</sup> *Institute of Physical and Theoretical Chemistry, University of Regensburg, D-93053, Germany*



# Table of Contents

|                                                                                   |           |
|-----------------------------------------------------------------------------------|-----------|
| <b>EXPERIMENTAL DATA</b> .....                                                    | <b>5</b>  |
| NMR-SPECTROSCOPY .....                                                            | 5         |
| PULSE SEQUENCES AND ACQUISITION PARAMETERS .....                                  | 5         |
| MASS SPECTROMETRY .....                                                           | 6         |
| CHEMISTRY .....                                                                   | 7         |
| SYNTHESIS OF IMINE SUBSTRATES .....                                               | 7         |
| NMR SAMPLE PREPARATION .....                                                      | 15        |
| <b>STEINER-LIMBACH CORRELATION</b> .....                                          | <b>16</b> |
| THEORY .....                                                                      | 16        |
| EXPERIMENTAL <sup>1</sup> H AND <sup>15</sup> N CHEMICAL SHIFTS .....             | 16        |
| REFERENCING OF THE <sup>15</sup> N CHEMICAL SHIFT .....                           | 17        |
| CHEMICAL SHIFT MEASUREMENT .....                                                  | 17        |
| COMPLETE SET OF SPECTRA .....                                                     | 19        |
| NMR MEASUREMENTS AT 273 K .....                                                   | 30        |
| <b><sup>15</sup>N-LABELING OF NTPA 1</b> .....                                    | <b>33</b> |
| SYNTHESIS.....                                                                    | 33        |
| COMPARISON OF <sup>15</sup> N-LABELED AND NOT LABELED NTPA 1.....                 | 34        |
| <b>QUALITATIVE DETECTION OF <sup>2</sup>H/<sub>PH</sub> SCALAR COUPLING</b> ..... | <b>36</b> |
| <b>CHEMICAL EXCHANGE</b> .....                                                    | <b>38</b> |
| <b>ASSIGNMENTS OF THE CHEMICAL SHIFTS</b> .....                                   | <b>40</b> |
| <b>STRUCTURE IDENTIFICATION OF THE BINARY COMPLEX</b> .....                       | <b>41</b> |
| BINARY NTPA 1/IMINE 2 COMPLEX.....                                                | 41        |
| CHARACTERISTIC <sup>1</sup> H, <sup>1</sup> H-NOESY CROSS SIGNALS.....            | 42        |
| CHARACTERISTIC <sup>1</sup> H, <sup>19</sup> F-HOESY CROSS SIGNALS.....           | 44        |
| <b>ASYMMETRIC MUKAIYAMA-MANNICH REACTION</b> .....                                | <b>46</b> |
| REACTION.....                                                                     | 46        |
| HPLC CONDITIONS.....                                                              | 47        |
| HPLC CHROMATOGRAMS .....                                                          | 48        |

<sup>a</sup> Institut für Organische Chemie, Universität Regensburg, D-93053 Regensburg, Germany. E-mail: ruth.gschwind@chemie.uni-regensburg.de

<sup>b</sup> Institute of Physical and Theoretical Chemistry, University of Regensburg, D-93053, Germany

|                                                                                                                                                                                    |                   |
|------------------------------------------------------------------------------------------------------------------------------------------------------------------------------------|-------------------|
| <b><u>MOLECULAR DYNAMICS (MD) SIMULATIONS .....</u></b>                                                                                                                            | <b><u>55</u></b>  |
| METHODS .....                                                                                                                                                                      | 56                |
| MAYER BOND ORDERS: AN INITIAL CHECK FOR VALIDITY .....                                                                                                                             | 59                |
| COMPARISON OF WEIGHTED DISTANCES WITH NOE-CONTACTS .....                                                                                                                           | 61                |
| MULTIPLE CONFORMERS OF INTEREST CORRESPOND TO STRUCTURE MOTIF I.....                                                                                                               | 95                |
| THE H-BOND ORIENTATION TOWARDS THE NTPA OXYGEN ATOM .....                                                                                                                          | 96                |
| POTENTIALS OF MEAN FORCE (PMFs) FROM UMBRELLA SAMPLING ALONG THE NTPA N- E-IMINIUM H <sup>+</sup> DISTANCE SUGGESTS THE "NTPA OXYGEN-BASED" H-BOND AS THE PREFERRED POSITION ..... | 100               |
| <b>FORCEFIELD PARAMETERS USED FOR THE MD-SIMULATIONS.....</b>                                                                                                                      | <b>105</b>        |
| <b><u>DFT STRUCTURE OPTIMIZATION RESULTS BASED ON THE MD-STRUCTURE MOTIF, WHICH WAS IDENTIFIED WITH POSSIBLE NOE-CONTACTS.....</u></b>                                             | <b><u>143</u></b> |
| <b><u>REFERENCES .....</u></b>                                                                                                                                                     | <b><u>157</u></b> |

---

<sup>a</sup> Institut für Organische Chemie, Universität Regensburg, D-93053 Regensburg, Germany. E-mail: ruth.gschwind@chemie.uni-regensburg.de

<sup>b</sup> Institute of Physical and Theoretical Chemistry, University of Regensburg, D-93053, Germany

## Experimental data

### NMR-Spectroscopy

All NMR spectroscopic investigations on model systems were performed on a Bruker Avance DRX 600 MHz spectrometer with TBI (Triple resonance broadband inverse) 5 mm CPPBBO 1H/19F-BB probe head with Z-gradient and BVT unit. Temperature was controlled in the VT-experiments by a BVT 3000 and BVT 3900 unit and liquid nitrogen. Further NMR experiments were performed on Bruker Avance III HD 400 MHz spectrometer equipped with 5 mm BBO BB-1H/D probe head with Z-Gradients. Spectrometer control and spectra processing was performed with Bruker Software TopSpin (Version 3.2 PL 1). Further data procession, data preparation and data presentation was performed with Microsoft Excel, Origin 2021, Corel Draw X7 and ChemDraw Professional.  $^1\text{H}$  and  $^{13}\text{C}$  chemical shifts were referenced to TMS or the respective solvent signals. The heteronuclei  $^{15}\text{N}$ ,  $^{19}\text{F}$  and  $^{31}\text{P}$  were referenced, employing  $\nu(\text{X}) = \nu(\text{TMS}) \cdot \epsilon_{\text{reference}} / 100 \%$  according to Harris et al.<sup>1</sup> The following frequency ratios and reference compounds were used:  $\epsilon(^{15}\text{N}) = 10.132912$  (lq.  $\text{NH}_3$ ),  $\epsilon(^{19}\text{F}) = 94.094011$  ( $\text{CCl}_3\text{F}$ ) and  $\epsilon(^{31}\text{P}) = 40.480742$  ( $\text{H}_3\text{PO}_4$ ). To optimize the mixing times for the NOESY and HOESY experiments, we utilized the AU popt feature in Topspin to prevent spin diffusion. For all NMR measurements, 5 mm NMR tubes were used.

### Pulse Sequences and Acquisition Parameters

Standard pulse sequences from the Bruker pulse sequence catalogue (zg, zg30, etc.) have been used. The respective pulse programs are not listed within the experimental part. Special pulse programs (qualitative detection of scalar coupling with modified  $^1\text{H}$   $^{31}\text{P}$  HMBC measurements) are listed in Chapter "Qualitative Detection of  $^{2\text{h}}\text{J}^{\text{PH}}$  scalar coupling". The following acquisition parameter have been used:

$^1\text{H}$ -NMR: Pulse program zg30, Relaxation delay = 2.00 s, Acquisition time = 2.54 s, SW = 22 - 24 ppm, TD = 66 K, ns = 1 - 256;

$^{13}\text{C}$  NMR: Pulse program: zgpg30, Relaxation delay = 2.00 s, Acquisition time = 0.80 s, TD = 66 K; SW = 270.0 ppm, TD = 64k, NS = 1k - 4k;

---

<sup>a</sup> Institut für Organische Chemie, Universität Regensburg, D-93053 Regensburg, Germany. E-mail: ruth.gschwind@chemie.uni-regensburg.de

<sup>b</sup> Institute of Physical and Theoretical Chemistry, University of Regensburg, D-93053, Germany

<sup>15</sup>N NMR: Pulse program: zg30; Relaxation delay = 3.00 s, Acquisition time = 1.06 s; SW = 507.5 ppm, TD = 66 K; NS = 1K - 4K;

<sup>19</sup>F-NMR: Pulse program: zg30; Relaxation delay = 2.00 s, Acquisition time = 5.79 s, SW = 20.0 ppm, TD = 131k, NS = 64;

<sup>31</sup>P-NMR: Pulse program: zgpg30; Relaxation delay = 1.00 s, Acquisition time = 2.25 s, SW = 60.0 ppm, TD = 65k, NS = 256 - 512;

2D-<sup>1</sup>H <sup>1</sup>H NOESY: Pulse program: noesygpph; Relaxation delay = 5.00 s, NS = 8 - 16, mixing time (D8) = 100.00 ms; TD F2 = 4096; increments (TD F1) = 512 - 1k;

2D-<sup>1</sup>H <sup>1</sup>H COSY: Pulse program: cosygpqf; Relaxation delay = 5.00 s, NS = 4 - 16, TD F2 = 4096; increments (TD F1) = 512;

2D-<sup>1</sup>H <sup>13</sup>C HSQC: Pulse program: hsqcedetgpsisp2.3; Relaxation delay = 4 - 8 s, NS = 8 - 32,  $^1J_{\text{XH}} = 145$  Hz; TD F2 = 4096; increments (TD F1) = 512 - 1k;

2D-<sup>1</sup>H <sup>13</sup>C HMBC: Pulse program: hmbcgpplndqf; Relaxation delay = 4.00 s, NS = 8 - 16,  $^1J_{\text{XH}} = 145$  Hz,  $J_{\text{XH}}(\text{long range}) = 10$  Hz; TD F2 = 4096; increments (TD F1) = 512 - 1k;

2D-<sup>1</sup>H <sup>31</sup>P HMBC: Pulse program: inv4gplrndqf; Relaxation delay = 6.00 s, NS = 4 - 32, TD F2 = 4096; increments (TD F1) = 256 - 512;

2D-<sup>1</sup>H <sup>15</sup>N HMBC: Pulse program: inv4gplrndqf; Relaxation delay = 4.00 s, NS = 4 - 16, delay for evolution of long range couplings (D6) = 20.00 ms; TD F2 = 4096; increments (TD F1) = 256;

2D-<sup>1</sup>H <sup>19</sup>F HOESY: Pulse program: hoesyph; Relaxation delay = 5.00 s, NS = 8, mixing time (D8) = 350.00 ms; TD F2 = 4096; increments (TD F1) = 850 - 1250;

1D <sup>1</sup>H <sup>31</sup>P HMBC: Pulse program<sup>2</sup>: Relaxation delay = 4.00 s, Acquisition time = 1.23 s, SW = 22 ppm, TD F2 = 33 K NS = 256, CNST 3 = 22.

## Mass Spectrometry

High resolution mass spectra were measured by the central analytics division in the Institute of Organic Chemistry. Gas chromatography coupled with a mass selective detector was performed on an Agilent 6890N Network GC-System.

<sup>a</sup> Institut für Organische Chemie, Universität Regensburg, D-93053 Regensburg, Germany. E-mail: ruth.gschwind@chemie.uni-regensburg.de

<sup>b</sup> Institute of Physical and Theoretical Chemistry, University of Regensburg, D-93053, Germany

## Chemistry

Deuterated solvents were purchased from Deutero or Sigma Aldrich. Where dry solvents were essential,  $\text{CD}_2\text{Cl}_2$  was refluxed over  $\text{CaH}_2$  for at least 5 h under Argon atmosphere and freshly distilled prior use. Toluene was refluxed over Na/Benzophenone under Argon atmosphere or purchased by Sigma Aldrich (dry, stored over molecular sieve). (*R*)-NTPA **1** was purchased by BLDpharm. All commercially available chemicals were purchased by Sigma Aldrich and used without further purification.

### Synthesis of Imine Substrates

All imines were synthesized according to modified literature.<sup>3-8</sup> Characterization was performed on Bruker Avance III HD 400 MHz spectrometer equipped with 5 mm BBO BB- $^1\text{H}/\text{D}$  probe head with Z-Gradients.

#### General procedure for the synthesis of imines (GP I):

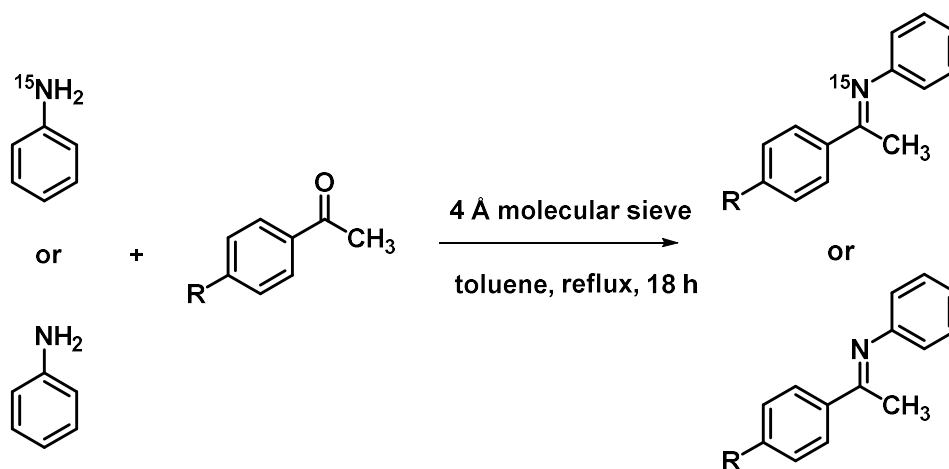

Molecular sieves 4 Å (4 g) were weighed in to a 50 ml Schlenk flask equipped with a stopper. The setup was connected to a vacuum line and was evacuated and dried with a heat gun at 350 °C. Under Argon flow, Aniline or  $^{15}\text{N}$ -Aniline (98 %  $^{15}\text{N}$ ) (10.5 mmol, 1.1 equiv.) and the respective ketone (10 mmol, 1.0 equiv.) were added to the Schlenk flask under argon atmosphere and were dissolved in 20 ml toluene. The stop cock was exchanged with a reflux

<sup>a</sup> Institut für Organische Chemie, Universität Regensburg, D-93053 Regensburg, Germany. E-mail: ruth.gschwind@chemie.uni-regensburg.de

<sup>b</sup> Institute of Physical and Theoretical Chemistry, University of Regensburg, D-93053, Germany

condenser and a drying tube filled with CaCl<sub>2</sub> and the solution was heated to reflux for 18 hours. The orange solution was filtered off from the molecular sieves and was concentrated under reduced pressure. The remaining solid was recrystallized from methanol. The product was obtained as yellow solid.

---

<sup>a</sup> *Institut für Organische Chemie, Universität Regensburg, D-93053 Regensburg, Germany. E-mail: ruth.gschwind@chemie.uni-regensburg.de*

<sup>b</sup> *Institute of Physical and Theoretical Chemistry, University of Regensburg, D-93053, Germany*



**(E)-1-(4-methoxyphenyl)-N-phenylethane-1-imine (98% <sup>15</sup>N)**

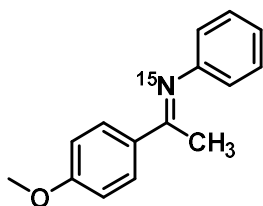

2

<sup>15</sup>N-labeled imine was synthesized following GP I and obtained as light-yellow needles (40 %) predominantly as *E* isomer (>99 % via <sup>1</sup>H-NMR). <sup>1</sup>H and <sup>13</sup>C NMR data were in accordance with literature.<sup>9</sup>

**<sup>1</sup>H-NMR** (400.1 MHz, CD<sub>2</sub>Cl<sub>2</sub>) δH = 7.95 (m, 2H), 7.34 (m, 2H), 7.07 (m, 1H), 6.96 (m, 2H), 6.76 (m, 2H), 3.86 (s, 3H), 2.18 ppm (d, <sup>3</sup>J<sub>HN</sub> = 1.85 Hz, 3H).

**<sup>13</sup>C-NMR** (100.6 MHz, CD<sub>2</sub>Cl<sub>2</sub>): δC = 164.5, 161.9, 152.5, 132.5, 129.3, 129.2, 123.2, 119.9, 113.9, 55.8, 17.2 ppm.

**(E)-1-(4-methylphenyl)-N-phenylethane-1-imine (98% <sup>15</sup>N)**

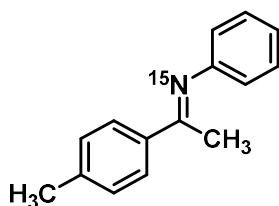

3

<sup>15</sup>N-labeled imine was synthesized following GP I and obtained as light-yellow needles (25 %) predominantly as *E* isomer (>99 % via <sup>1</sup>H-NMR). <sup>1</sup>H and <sup>13</sup>C NMR data were in accordance with literature.<sup>9</sup>

**<sup>1</sup>H-NMR** (400.1 MHz, CD<sub>2</sub>Cl<sub>2</sub>) δH = 7.86 (m, 2H), 7.34 (m, 2H), 7.25 (m, 2H), 7.06 (m, 1H), 6.76 (m, 2H), 2.40 (s, 3H) 2.18 ppm (d, <sup>3</sup>J<sub>HN</sub> = 1.76 Hz, 3H).

**<sup>13</sup>C-NMR** (100.6 MHz, CD<sub>2</sub>Cl<sub>2</sub>): δC = 165.3, 152.4, 141.2, 137.3, 129.5, 129.3, 127.5, 123.3, 119.7, 21.5, 17.4 ppm.

<sup>a</sup> Institut für Organische Chemie, Universität Regensburg, D-93053 Regensburg, Germany. E-mail: ruth.gschwind@chemie.uni-regensburg.de

<sup>b</sup> Institute of Physical and Theoretical Chemistry, University of Regensburg, D-93053, Germany

**(E)-N-phenyl-1-(4-(trifluoromethyl)phenyl)ethane-1-imine (98% <sup>15</sup>N)**

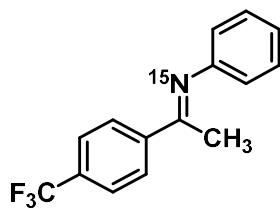

**4**

<sup>15</sup>N-labeled imine was synthesized following GP I and obtained as light-yellow needles (55 %) predominantly as *E* isomer (>99 % via <sup>1</sup>H-NMR). <sup>1</sup>H and <sup>13</sup>C NMR data were in accordance with literature.<sup>3</sup>

**<sup>1</sup>H-NMR** (400.1 MHz, CD<sub>2</sub>Cl<sub>2</sub>) δH = 8.11 (m, 2H), 7.73 (m, 2H), 7.38 (m, 2H), 7.12 (m, 1H), 6.80 (m, 2H), 2.25 ppm (d, <sup>3</sup>J<sub>NH</sub> = 1.8 Hz, 3H).

**<sup>13</sup>C-NMR** (100.6 MHz, CD<sub>2</sub>Cl<sub>2</sub>): δC = 164.5, 151.7, 143.2, 132.1, 129.4, 128.0, 125.6, 124.6, 123.9, 119.5, 17.5 ppm.

**(E)-1-(3,5-bis(trifluoromethyl)phenyl)-N-phenylethan-1-imine (98% <sup>15</sup>N)**

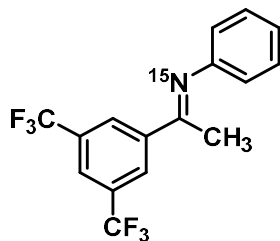

**5**

<sup>15</sup>N-labeled imine was synthesized following GP I and obtained as a yellow oil (18 %) predominantly as *E* isomer (>99 % via <sup>1</sup>H-NMR). <sup>1</sup>H and <sup>13</sup>C NMR data were in accordance with literature.<sup>3</sup>

**<sup>1</sup>H-NMR** (400.1 MHz, CD<sub>2</sub>Cl<sub>2</sub>) δH = 8.47 (m, 2H), 8.01 (m, 1H), 7.39 (m, 2H), 7.14 (m, 1H), 6.81 (m, 2H), 2.29 ppm (d, 3H, <sup>3</sup>J<sub>NH</sub> = 1.8 Hz).

**<sup>13</sup>C-NMR** (100.6 MHz, CD<sub>2</sub>Cl<sub>2</sub>): δC = 163.0, 151.1, 141.9, 131.9, 129.5, 127.8, 125.2, 124.3, 124.1, 123.8, 119.4, 17.4 ppm.

<sup>a</sup> Institut für Organische Chemie, Universität Regensburg, D-93053 Regensburg, Germany. E-mail: ruth.gschwind@chemie.uni-regensburg.de

<sup>b</sup> Institute of Physical and Theoretical Chemistry, University of Regensburg, D-93053, Germany

**(E)-1-(naphthalen-2-yl)-N-phenylethan-1-imine (98% <sup>15</sup>N)**

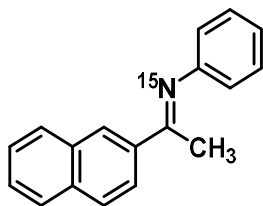

6

<sup>15</sup>N-labeled imine was synthesized following GP I and obtained as light-yellow needles (60 %) predominantly as *E* isomer (>99 % via <sup>1</sup>H-NMR). <sup>1</sup>H and <sup>13</sup>C NMR data were in accordance with literature.<sup>9</sup>

**<sup>1</sup>H-NMR** (400.1 MHz, CD<sub>2</sub>Cl<sub>2</sub>) δH = 8.37 (s, 1H), 8.24 (m, 1H), 7.99 – 7.94 (m, 1H), 7.94 – 7.87 (m, 2H), 7.60 – 7.52 (m, 2H), 7.42 – 7.35 (m, 2H), 7.11 (m, 1H), 6.83 (m, 2H), 2.34 ppm (d, <sup>3</sup>J<sub>HN</sub> = 1.76 Hz, 3H).

**<sup>13</sup>C-NMR** (100.6 MHz, CD<sub>2</sub>Cl<sub>2</sub>): δC = 165.3, 152.3, 137.3, 134.8, 133.3, 129.3, 129.2, 128.2, 128.1, 128.0, 127.6, 126.7, 124.6, 123.5, 119.7, 17.4 ppm.

**(E)-N-phenyl-1-(4-(tert-butyl)phenyl)ethan-1-imine (98% <sup>15</sup>N)**

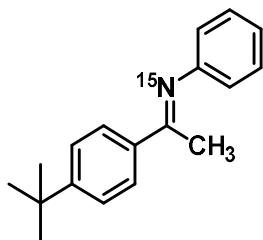

7

<sup>15</sup>N-labeled imine was synthesized following GP I and obtained as light-yellow needles (28 %) predominantly as *E* isomer (>99 % via <sup>1</sup>H-NMR). <sup>1</sup>H and <sup>13</sup>C NMR data were in accordance with literature.<sup>7</sup>

**<sup>1</sup>H-NMR** (400.1 MHz, CD<sub>2</sub>Cl<sub>2</sub>) δH = 7.91 (m, 2H), 7.48 (m, 2H), 7.35 (m, 2H), 7.07 (m, 1H), 6.76 (m, 2H), 2.20 (d, <sup>3</sup>J<sub>HN</sub> = 1.83 Hz, 3H), 1.34 ppm (s, 9H).

**<sup>13</sup>C-NMR** (100.6 MHz, CD<sub>2</sub>Cl<sub>2</sub>): δC = 165.9, 154.9, 153.1, 137.9, 129.6, 128.0, 126.3, 124.0, 120.4, 35.7, 32.0, 18.1 ppm.

<sup>a</sup> Institut für Organische Chemie, Universität Regensburg, D-93053 Regensburg, Germany. E-mail: ruth.gschwind@chemie.uni-regensburg.de

<sup>b</sup> Institute of Physical and Theoretical Chemistry, University of Regensburg, D-93053, Germany

**(*E*)-1-(naphthalen-1-yl)-*N*-phenylethan-1-imine (98% <sup>15</sup>N)**

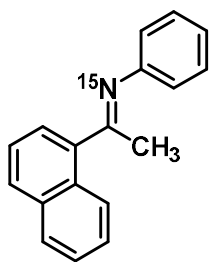

**8**

<sup>15</sup>N-labeled imine was synthesized following GP I and obtained as yellow needles (42 %). The ratio between *E* and *Z* in solution was determined by <sup>1</sup>H-NMR to be 1.7 to 1. <sup>1</sup>H and <sup>13</sup>C NMR data were in accordance with literature.<sup>3</sup> Due to the presence of two isomers the <sup>1</sup>H and <sup>13</sup>C spectra are quite crowded in the aromatic region and therefore only representative signals are listed.

<sup>1</sup>H-NMR (400.1 MHz, CD<sub>2</sub>Cl<sub>2</sub>) δH = 2.61 (*Z*, s, 3H), 2.33 ppm (*E*, s, 3H)

<sup>13</sup>C-NMR (100.6 MHz, CD<sub>2</sub>Cl<sub>2</sub>): δC = 170.4 (*Z*), 169.2 (*E*), 29.9 (*Z*), 22.0 (*E*)

**(*E*)-1-(4-nitrophenyl)-*N*-phenylethan-1-imine (98% <sup>15</sup>N)**

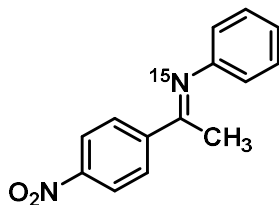

**9**

<sup>15</sup>N-labeled imine was synthesized following GP I and obtained as light-yellow needles (28 %) predominantly as *E* isomer (>99 % via <sup>1</sup>H-NMR). <sup>1</sup>H and <sup>13</sup>C NMR data were in accordance with literature.<sup>10</sup>

<sup>1</sup>H-NMR (400.1 MHz, CD<sub>2</sub>Cl<sub>2</sub>) δH = 8.29 (m, 2H), 8.15 (m, 2H), 7.39 (m, 2H), 7.13 (m, 1H), 6.80 (m, 2H), 2.27 ppm (d, <sup>3</sup>J<sub>HN</sub> = 1.73 Hz, 3H).

<sup>a</sup> Institut für Organische Chemie, Universität Regensburg, D-93053 Regensburg, Germany. E-mail: ruth.gschwind@chemie.uni-regensburg.de

<sup>b</sup> Institute of Physical and Theoretical Chemistry, University of Regensburg, D-93053, Germany

**(E)-1-(4-fluorophenyl)-N-phenylethan-1-imine (98% <sup>15</sup>N)**

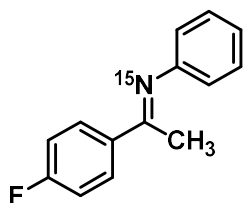

10

<sup>15</sup>N-labeled imine was synthesized following GP I and obtained as light-yellow needles (28 %) predominantly as *E* isomer (>99 % via <sup>1</sup>H-NMR). <sup>1</sup>H and <sup>13</sup>C NMR data were in accordance with literature.<sup>3</sup>

<sup>1</sup>H-NMR (400.1 MHz, CD<sub>2</sub>Cl<sub>2</sub>) δH = 8.00 (m, 2H), 7.35 (m, 2H), 7.14 (m, 2H), 7.09 (m, 1H), 6.77 (m, 2H), 2.20 ppm (d, 3H, <sup>3</sup>J<sub>NH</sub> = 1.8 Hz).

<sup>13</sup>C-NMR (100.6 MHz, CD<sub>2</sub>Cl<sub>2</sub>): δC = 164.6, 164.3, 152.1, 136.2, 129.7, 129.3, 123.5, 119.6, 115.5, 17.4 ppm.

**(E)-1-(4-bromophenyl)-N-phenylethan-1-imine (98% <sup>15</sup>N)**

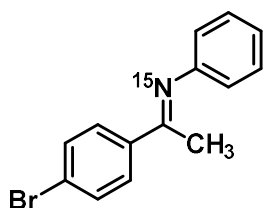

11

<sup>15</sup>N-labeled imine was synthesized following GP I and obtained as light-yellow needles (36 %) predominantly as *E* isomer (>99 % via <sup>1</sup>H-NMR). <sup>1</sup>H and <sup>13</sup>C NMR data were in accordance with literature.<sup>3</sup>

<sup>1</sup>H-NMR (400.1 MHz, CD<sub>2</sub>Cl<sub>2</sub>) δH = 7.87 (m, 2H), 7.59 (m, 2H), 7.36 (m, 2H), 7.09 (m, 1H), 6.77 (m, 2H), 2.20 ppm (d, 3H, <sup>3</sup>J<sub>NH</sub> = 1.8 Hz).

<sup>13</sup>C-NMR (100.6 MHz, CD<sub>2</sub>Cl<sub>2</sub>): δC = 164.5, 151.9, 138.9, 131.8, 129.3, 129.2, 125.2, 123.6, 119.6, 17.3 ppm.

<sup>a</sup> Institut für Organische Chemie, Universität Regensburg, D-93053 Regensburg, Germany. E-mail: ruth.gschwind@chemie.uni-regensburg.de

<sup>b</sup> Institute of Physical and Theoretical Chemistry, University of Regensburg, D-93053, Germany

### **(E)-1-(perfluorophenyl)-N-phenylethan-1-imine**

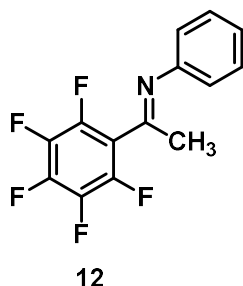

Imine was synthesized according to literature.<sup>11</sup> Molecular sieves 4 Å (4 g) were weighed in to a 50 ml Schlenk flask equipped with a reflux condenser and a stopper. The setup was connected to a vacuum line and was evacuated and dried with a heat gun at 350 °C. Under Argon flow, Aniline (10.5 mmol, 1.1 equiv.) and the respective ketone (10 mmol, 1.0 equiv.) were added to the Schlenk flask under argon atmosphere and were dissolved in 20 ml toluene. The stop cock was exchanged with a drying tube filled with CaCl<sub>2</sub> and the solution was stirred at room temperature for 18 hours. The orange solution was filtered through celite, concentrated under reduced pressure und purified by bulb-to-bulb distillation. The imine was obtained as an orange oil (25 %) as a mixture of *E* isomer and *Z* isomer (*E/Z* = 54/46 % via <sup>1</sup>H-NMR). <sup>1</sup>H and <sup>19</sup>F NMR data were in accordance with literature.<sup>11</sup>

#### *E*-isomer

<sup>1</sup>H-NMR (400.1 MHz, CD<sub>2</sub>Cl<sub>2</sub>) δH = 7.22-7.13 (m, 3H), 6.67 (d, 2H, <sup>2</sup>J<sub>HH</sub> = 7.48 Hz), 2.50 ppm (s, 3H).

<sup>19</sup>F-NMR (376 MHz, CD<sub>2</sub>Cl<sub>2</sub>) δF = -139.4, -153.6, -161.5 ppm.

#### *Z*-isomer

<sup>1</sup>H-NMR (400.1 MHz, CD<sub>2</sub>Cl<sub>2</sub>) δH = 7.40 (t, 2H, <sup>2</sup>J<sub>HH</sub> = 7.89 Hz), 7.00 (t, 1H, <sup>2</sup>J<sub>HH</sub> = 7.49 Hz), 6.34 (d, 2H, <sup>2</sup>J<sub>HH</sub> = 8.29 Hz), 2.18 ppm (s, 3H).

<sup>19</sup>F-NMR (376 MHz, CD<sub>2</sub>Cl<sub>2</sub>) δF = -143.6, -154.7, -162.3 ppm.

<sup>a</sup> Institut für Organische Chemie, Universität Regensburg, D-93053 Regensburg, Germany. E-mail: ruth.gschwind@chemie.uni-regensburg.de

<sup>b</sup> Institute of Physical and Theoretical Chemistry, University of Regensburg, D-93053, Germany

## NMR Sample Preparation

### General procedure for the preparation of binary NTPA•E/Z-imine complexes (GP II):

The NTPA catalyst was weighted into a 5 mm NMR tube and dried for 30 min at 130 °C under reduced pressure. After cooling the tube to room temperature, <sup>15</sup>N labelled imine was weighted directly into the NMR tube. The tube was evacuated and flushed with Argon three times. Deuterated and dry CD<sub>2</sub>Cl<sub>2</sub> was added under Argon atmosphere, TMS was added, and the tube was closed and sealed with a parafilm. The sample was stored in a -80 °C freezer. For all samples a 1:1 ratio of catalyst/imine was used. Even after careful sample preparation, partial hydrolysis of the imine took place. Therefore, the catalyst/imine-ratios were slightly different from 1:1. The concentration of 25 mmol L<sup>-1</sup> or 40 mmol L<sup>-1</sup> was used for all samples.

---

<sup>a</sup> Institut für Organische Chemie, Universität Regensburg, D-93053 Regensburg, Germany. E-mail: ruth.gschwind@chemie.uni-regensburg.de

<sup>b</sup> Institute of Physical and Theoretical Chemistry, University of Regensburg, D-93053, Germany

## Steiner-Limbach correlation

### Theory

All the investigations regarding the hydrogen bond analysis were done in accordance with our previous work on CPA/imine complexes and DSI/imine complexes.<sup>3,12,13</sup>

### Experimental <sup>1</sup>H and <sup>15</sup>N chemical shifts

Table S1: Observed  $\delta(^1\text{H})$  and  $\delta(^{15}\text{N})$  chemical shifts and  $^1J_{\text{NH}}$  coupling constants of NTPA/imine complexes at 180 K and 600 MHz in  $\text{CD}_2\text{Cl}_2$ . (- = not determined)

|            | $\delta(^1\text{H})$ [ppm] | $\delta(^{15}\text{N})$ [ppm] | $^1J_{\text{NH}}$ [Hz] |
|------------|----------------------------|-------------------------------|------------------------|
| <i>E-2</i> | 13.61                      | 188.7                         | 90.50                  |
| <i>Z-2</i> | 13.92                      | 197.7                         | 89.62                  |
| <i>E-3</i> | 14.01                      | 196.9                         | -                      |
| <i>Z-3</i> | 14.25                      | 202.9                         | -                      |
| <i>E-4</i> | 14.68                      | 207.3                         | 89.01                  |
| <i>Z-4</i> | 14.85                      | 211.1                         |                        |
| <i>E-5</i> | 15.2                       | 215.2                         | 87.12                  |
| <i>Z-5</i> | 15.28                      | -                             | 86.90                  |
| <i>E-6</i> | 14.18                      | 197.1                         | 90.55                  |
| <i>Z-6</i> | 14.47                      | 204.9                         | 89.17                  |
| <i>E-7</i> | 14.04                      | 196.8                         | -                      |
| <i>Z-7</i> | 14.24                      | 202.5                         | -                      |
| <i>E-8</i> | -                          | -                             | -                      |

<sup>a</sup> Institut für Organische Chemie, Universität Regensburg, D-93053 Regensburg, Germany. E-mail: ruth.gschwind@chemie.uni-regensburg.de

<sup>b</sup> Institute of Physical and Theoretical Chemistry, University of Regensburg, D-93053, Germany



|      |       |        |       |
|------|-------|--------|-------|
| Z-8  | 14.92 | 215    | 89.91 |
| E-9  | 14.85 | -      | -     |
| Z-9  | 15.04 | 213.9  | 88.55 |
| E-10 | 14.26 | 198.6  | -     |
| Z-10 | 14.46 | 205.6  | 89.18 |
| E-11 | 14.38 | 201.6  | -     |
| Z-11 | 14.57 | 207.3  | 89.04 |
| E-12 | 15.86 | 229.6  | -     |
| Z-12 | 16.04 | 228.45 |       |

### Referencing of the $^{15}\text{N}$ chemical shift

The  $^{15}\text{N}$  chemical shifts are referenced by  $\delta(\text{OHN})_{\text{ref}} = \delta(\text{OHN})_{\text{obs}} - 340.8 \text{ ppm}$ . 340.8 ppm is the chemical shift of the free imine showing the strongest hydrogen bond in the previous work. Data points of phenols/carboxylic acids, tetrafluoroboric acid, TRIP, TiPSY and DSI were collected by K. Rothermel, N. Sorgenfrei, T. Hausler and M. Melikian, respectively.<sup>3,12,13</sup>

### Chemical Shift Measurement

The  $^1\text{H}$  and  $^{15}\text{N}$  chemical shifts of all binary NTPA/imine complexes were determined using  $^1\text{H}$  and  $^{15}\text{N}$  NMR or  $^1\text{H},^{15}\text{N}$ -HMBC spectroscopy.

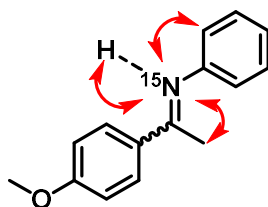

<sup>a</sup> Institut für Organische Chemie, Universität Regensburg, D-93053 Regensburg, Germany. E-mail: ruth.gschwind@chemie.uni-regensburg.de

<sup>b</sup> Institute of Physical and Theoretical Chemistry, University of Regensburg, D-93053, Germany

The  $^1\text{H},^{15}\text{N}$ -HMBC spectra allowed for the detection of the  $^{15}\text{N}$  chemical shift with respect to the hydrogen bond, the methyl group, or the aromatic proton.

---

<sup>a</sup> *Institut für Organische Chemie, Universität Regensburg, D-93053 Regensburg, Germany. E-mail: ruth.gschwind@chemie.uni-regensburg.de*

<sup>b</sup> *Institute of Physical and Theoretical Chemistry, University of Regensburg, D-93053, Germany*

## Complete Set of Spectra

*NTPA 1/imine-2 complex*

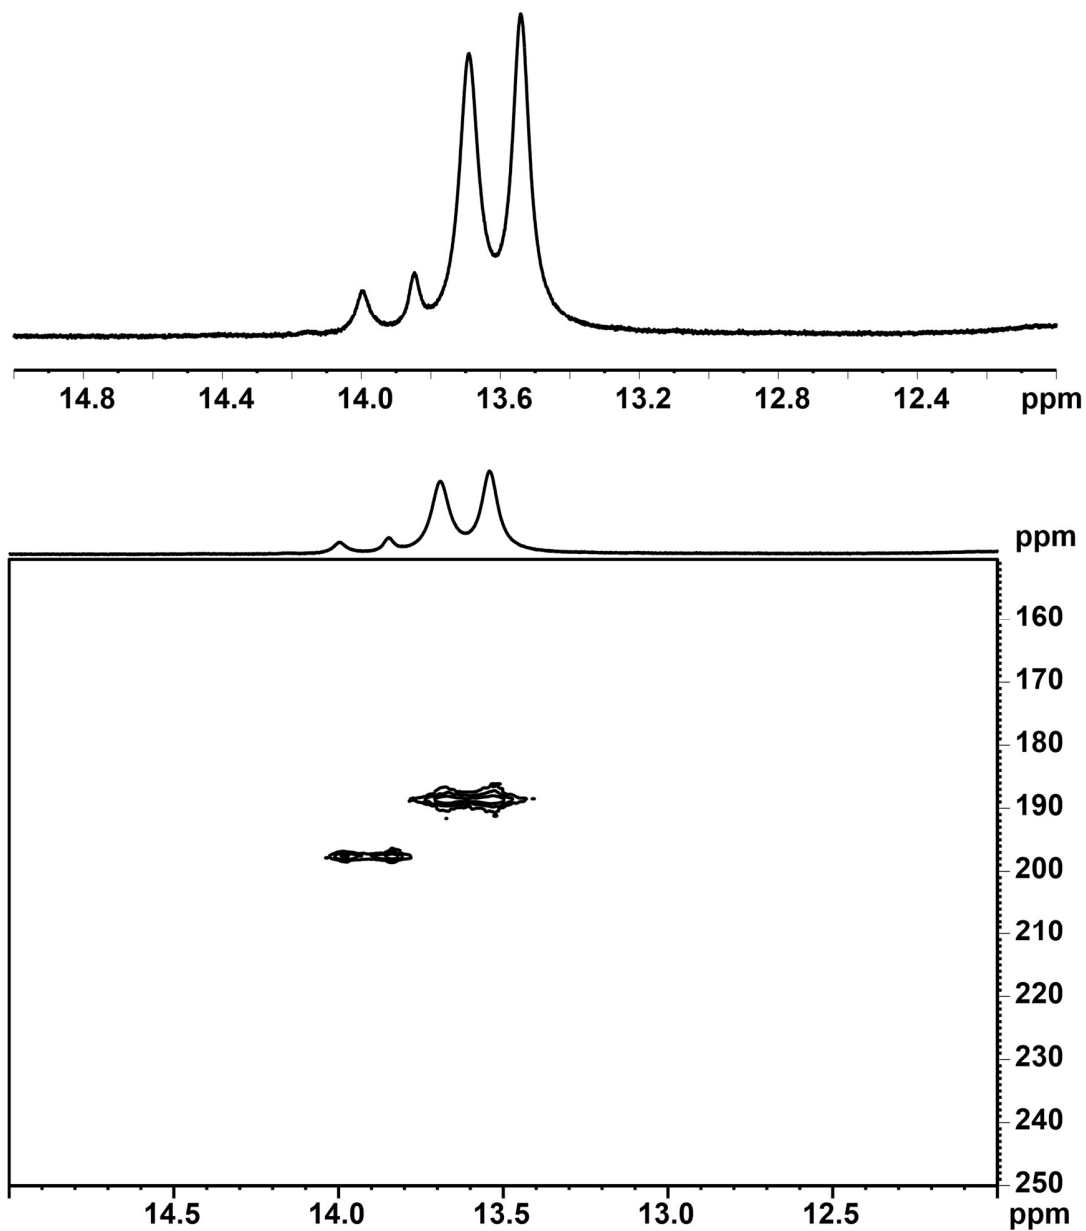

Figure S1: Low field section of the  $^1\text{H}$  spectrum of NTPA **1** and  $^{15}\text{N}$ -labeled imine **2** at 180 K and 600 MHz in  $\text{CD}_2\text{Cl}_2$ .  $^1\text{H}$   $^{15}\text{N}$  HMBC section for the of NTPA **1**/imine **2** complex at 180 K and 600 MHz in  $\text{CD}_2\text{Cl}_2$ . The section shows characteristic  $^1\text{H}$   $^{15}\text{N}$  HMBC cross signals for E- and Z-complex.

<sup>a</sup> Institut für Organische Chemie, Universität Regensburg, D-93053 Regensburg, Germany. E-mail: ruth.gschwind@chemie.uni-regensburg.de

<sup>b</sup> Institute of Physical and Theoretical Chemistry, University of Regensburg, D-93053, Germany

NTPA **1**/imine-**3** complex

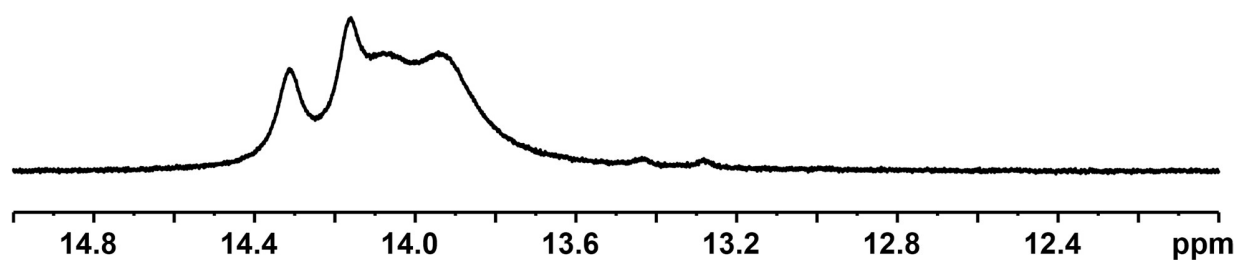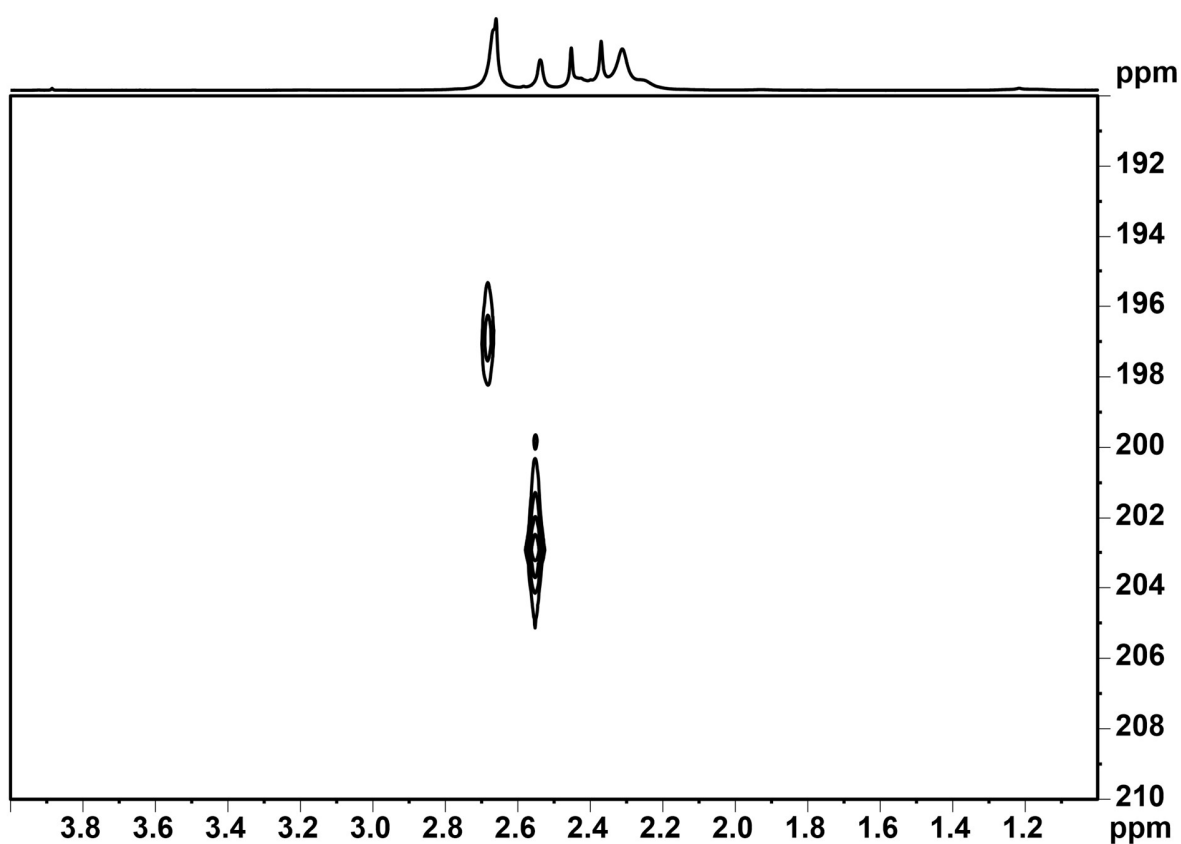

Figure S2: Low field section of the  $^1\text{H}$  spectrum of NTPA **1** and  $^{15}\text{N}$ -labeled imine **3** at 180 K and 600 MHz in  $\text{CD}_2\text{Cl}_2$ .  $^1\text{H}$   $^{15}\text{N}$  HMBC section for the of NTPA **1**/imine **3** complex at 180 K and 600 MHz in  $\text{CD}_2\text{Cl}_2$ . The section shows characteristic  $^1\text{H}$   $^{15}\text{N}$  HMBC cross signals for E- and Z-complex.

<sup>a</sup> Institut für Organische Chemie, Universität Regensburg, D-93053 Regensburg, Germany. E-mail: ruth.gschwind@chemie.uni-regensburg.de

<sup>b</sup> Institute of Physical and Theoretical Chemistry, University of Regensburg, D-93053, Germany

NTPA **1**/imine-**4** complex

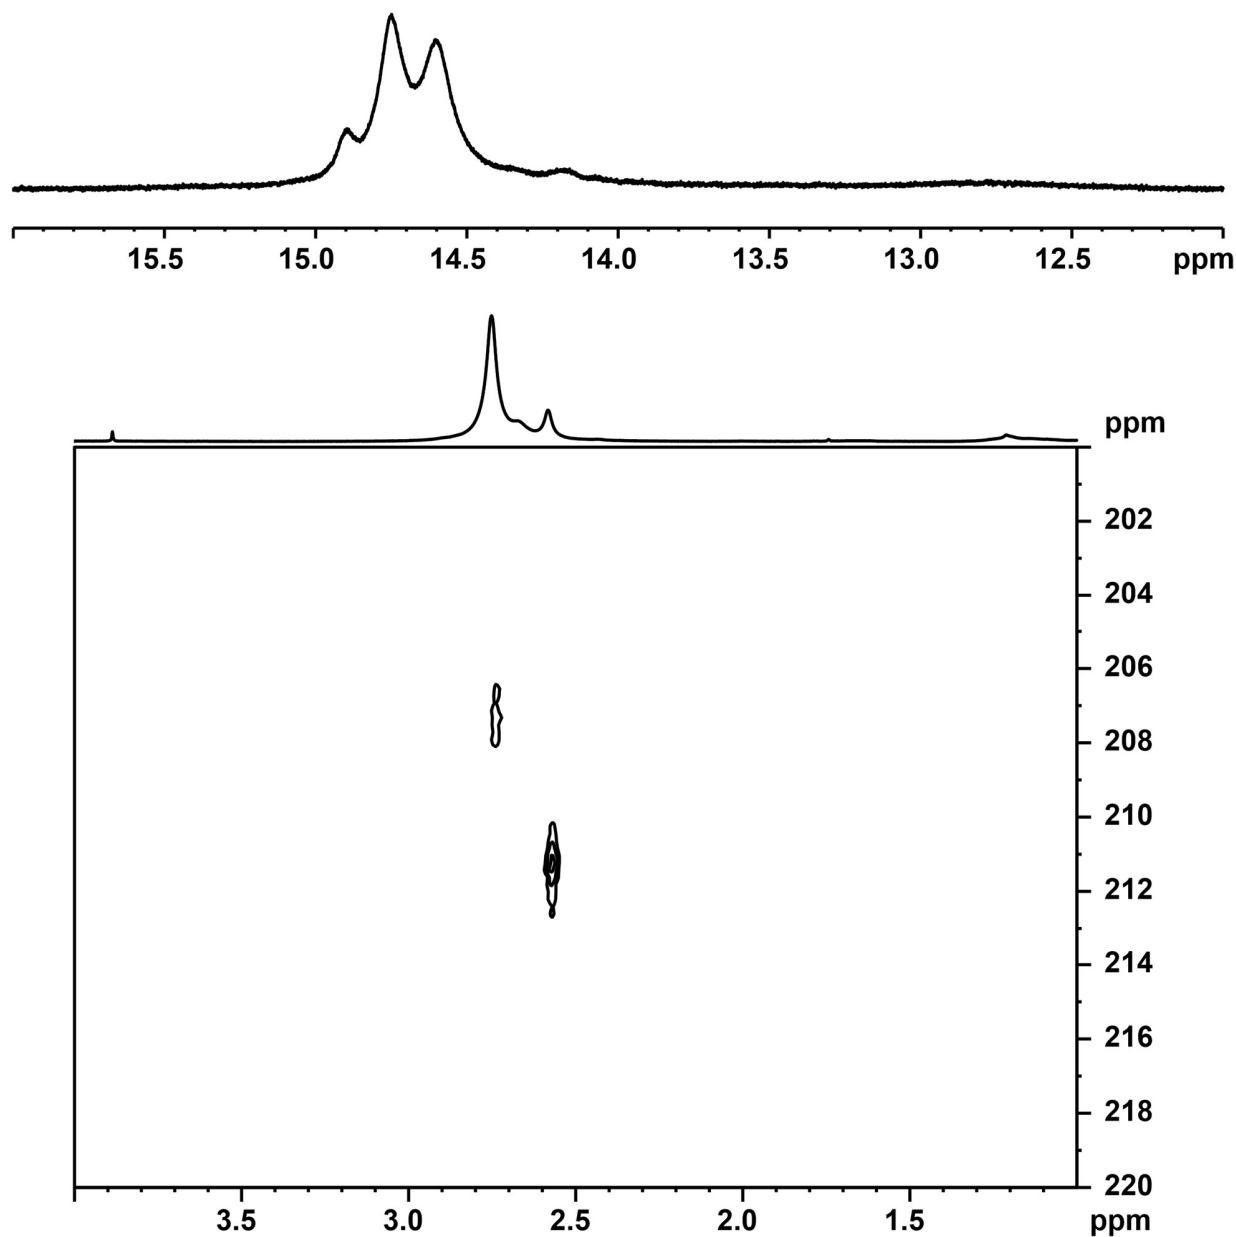

Figure S3: Low field section of the  $^1\text{H}$  spectrum of NTPA **1** and  $^{15}\text{N}$ -labeled imine **4** at 180 K and 600 MHz in  $\text{CD}_2\text{Cl}_2$ .  $^1\text{H}$   $^{15}\text{N}$  HMBC section for the of NTPA **1**/imine **4** complex at 180 K and 600 MHz in  $\text{CD}_2\text{Cl}_2$ . The section shows characteristic  $^1\text{H}$   $^{15}\text{N}$  HMBC cross signals for E- and Z-complex.

<sup>a</sup> Institut für Organische Chemie, Universität Regensburg, D-93053 Regensburg, Germany. E-mail: ruth.gschwind@chemie.uni-regensburg.de

<sup>b</sup> Institute of Physical and Theoretical Chemistry, University of Regensburg, D-93053, Germany

NTPA **1**/imine-**5** complex

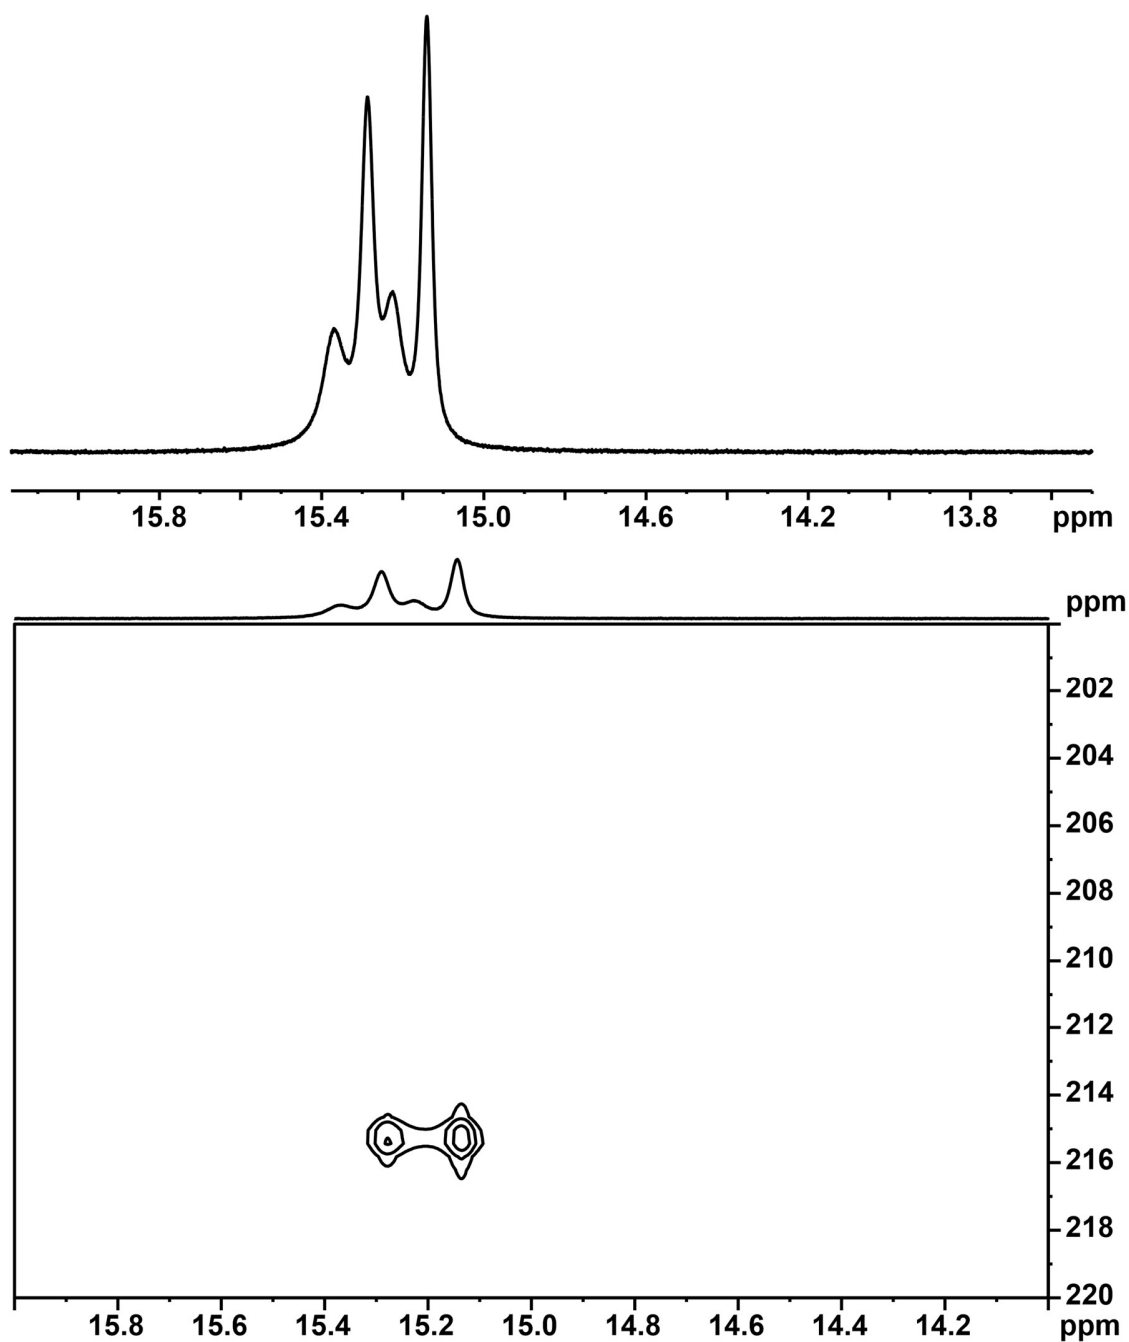

Figure S4: Low field section of the  $^1\text{H}$  spectrum of NTPA **1** and  $^{15}\text{N}$ -labeled imine **5** at 180 K and 600 MHz in  $\text{CD}_2\text{Cl}_2$ .  $^1\text{H}$   $^{15}\text{N}$  HMBC section for the of NTPA **1**/imine **5** complex at 180 K and 600 MHz in  $\text{CD}_2\text{Cl}_2$ . The section shows characteristic  $^1\text{H}$   $^{15}\text{N}$  HMBC cross signals for E- and Z-complex.

<sup>a</sup> Institut für Organische Chemie, Universität Regensburg, D-93053 Regensburg, Germany. E-mail: ruth.gschwind@chemie.uni-regensburg.de

<sup>b</sup> Institute of Physical and Theoretical Chemistry, University of Regensburg, D-93053, Germany

*NTPA 1/imine-6 complex*

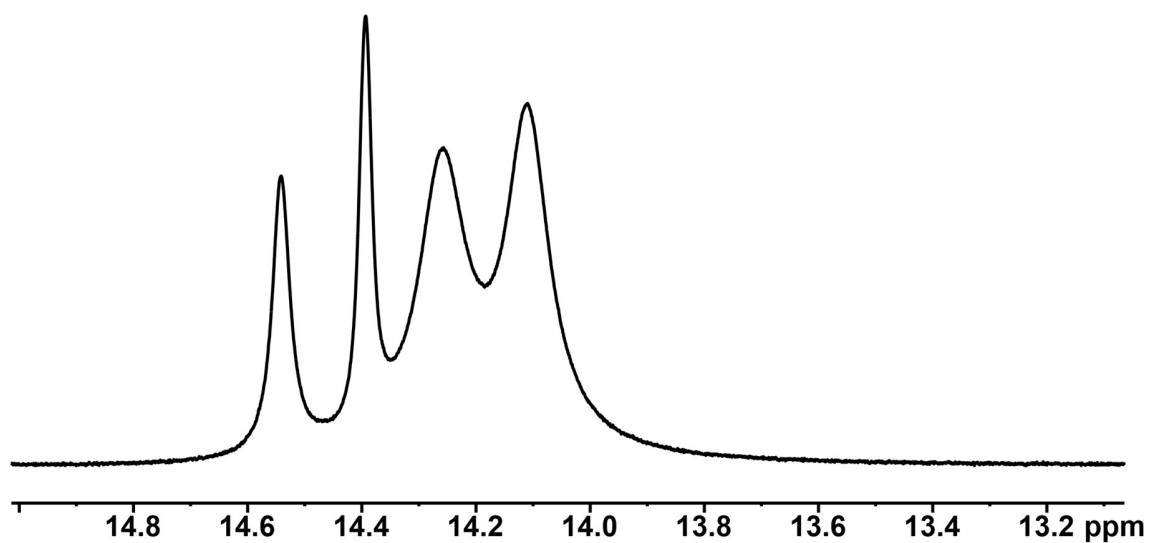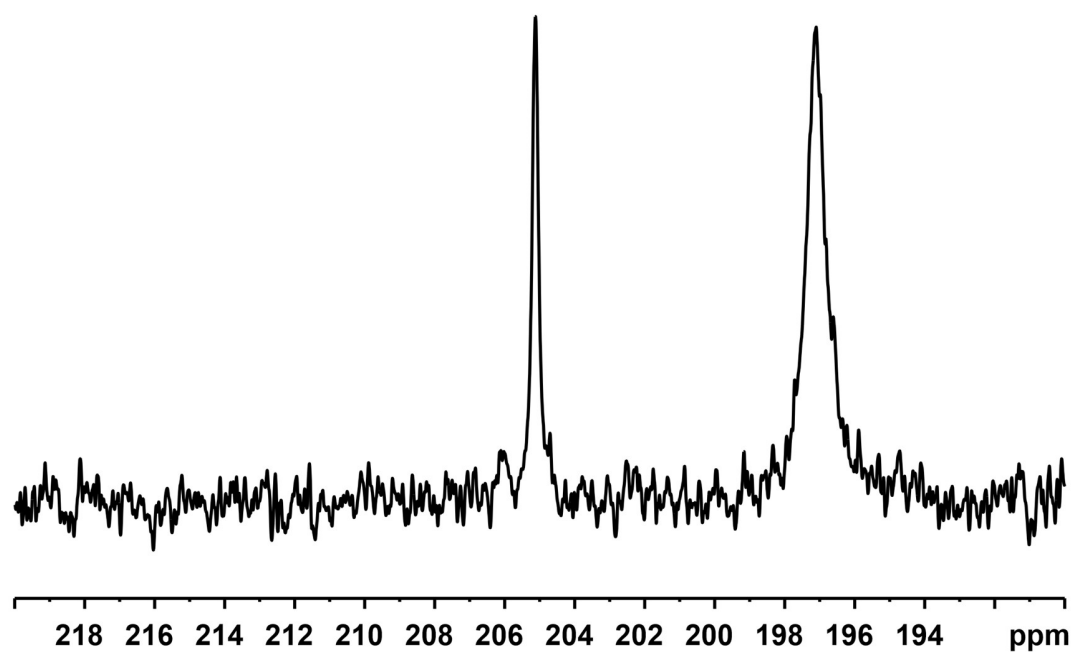

*Figure S5: Low field section of the  $^1\text{H}$  spectrum of NTPA **1** and  $^{15}\text{N}$ -labeled imine **6** at 180 K and 600 MHz in  $\text{CD}_2\text{Cl}_2$ .  $^{15}\text{N}$  spectrum of NTPA **1**/imine **6** complex at 180 K and 600 MHz in  $\text{CD}_2\text{Cl}_2$ .*

<sup>a</sup> Institut für Organische Chemie, Universität Regensburg, D-93053 Regensburg, Germany. E-mail: ruth.gschwind@chemie.uni-regensburg.de

<sup>b</sup> Institute of Physical and Theoretical Chemistry, University of Regensburg, D-93053, Germany

NTPA **1**/imine-**7** complex

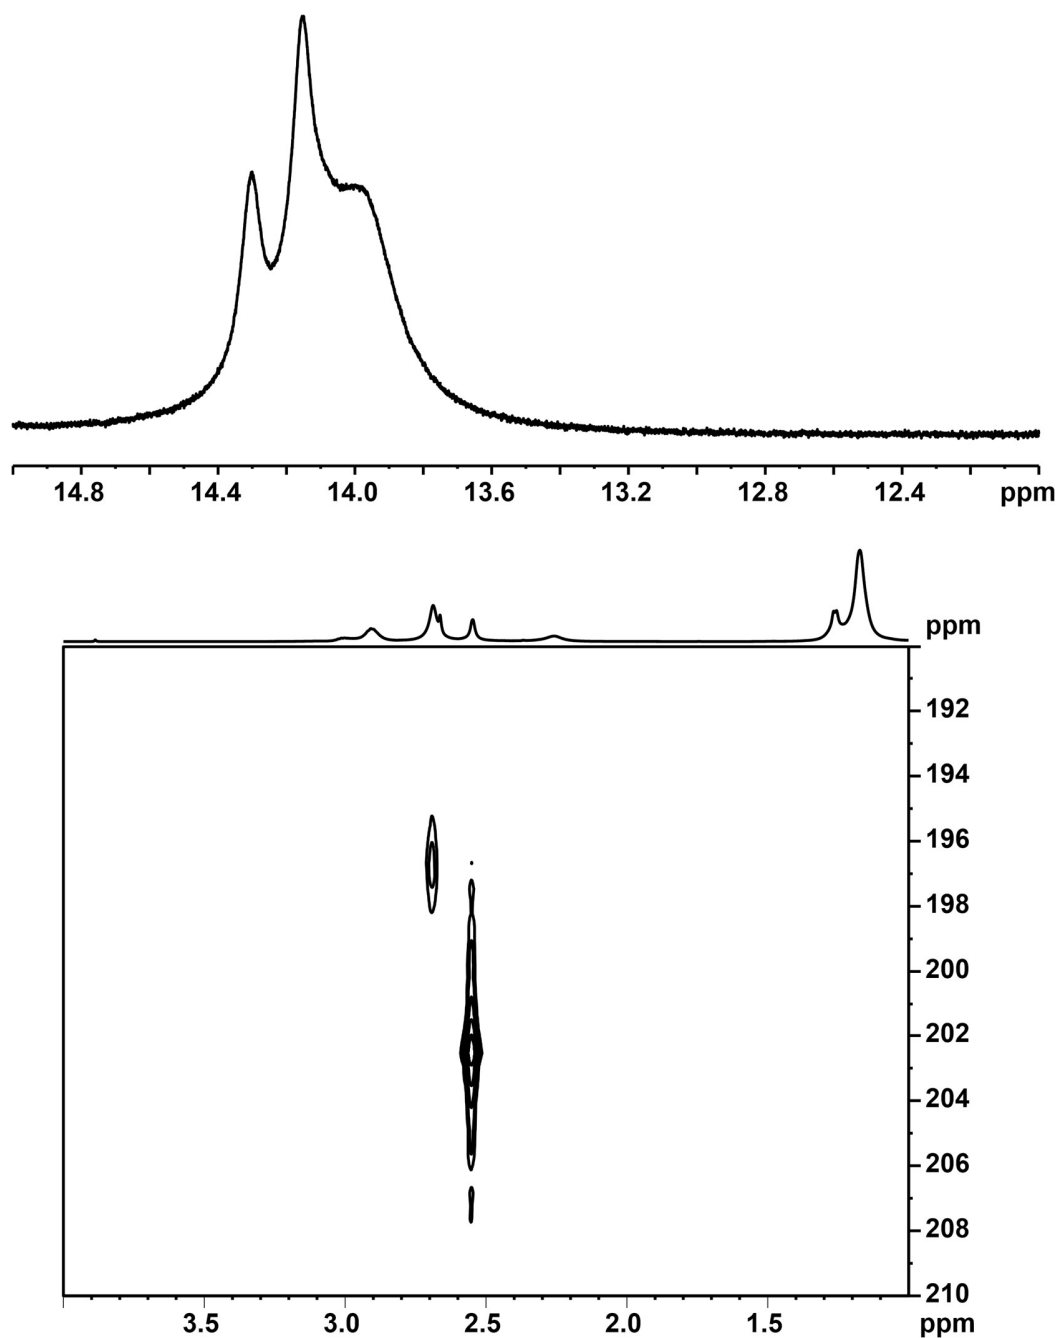

Figure S6: Low field section of the  $^1\text{H}$  spectrum of NTPA **1** and  $^{15}\text{N}$ -labeled imine **7** at 180 K and 600 MHz in  $\text{CD}_2\text{Cl}_2$ .  $^1\text{H}$   $^{15}\text{N}$  HMBC section for the of NTPA **1**/imine **7** complex at 180 K and 600 MHz in  $\text{CD}_2\text{Cl}_2$ . The section shows characteristic  $^1\text{H}$   $^{15}\text{N}$  HMBC cross signals for E- and Z-complex.

<sup>a</sup> Institut für Organische Chemie, Universität Regensburg, D-93053 Regensburg, Germany. E-mail: ruth.gschwind@chemie.uni-regensburg.de

<sup>b</sup> Institute of Physical and Theoretical Chemistry, University of Regensburg, D-93053, Germany



NTPA **1**/imine-**8** complex

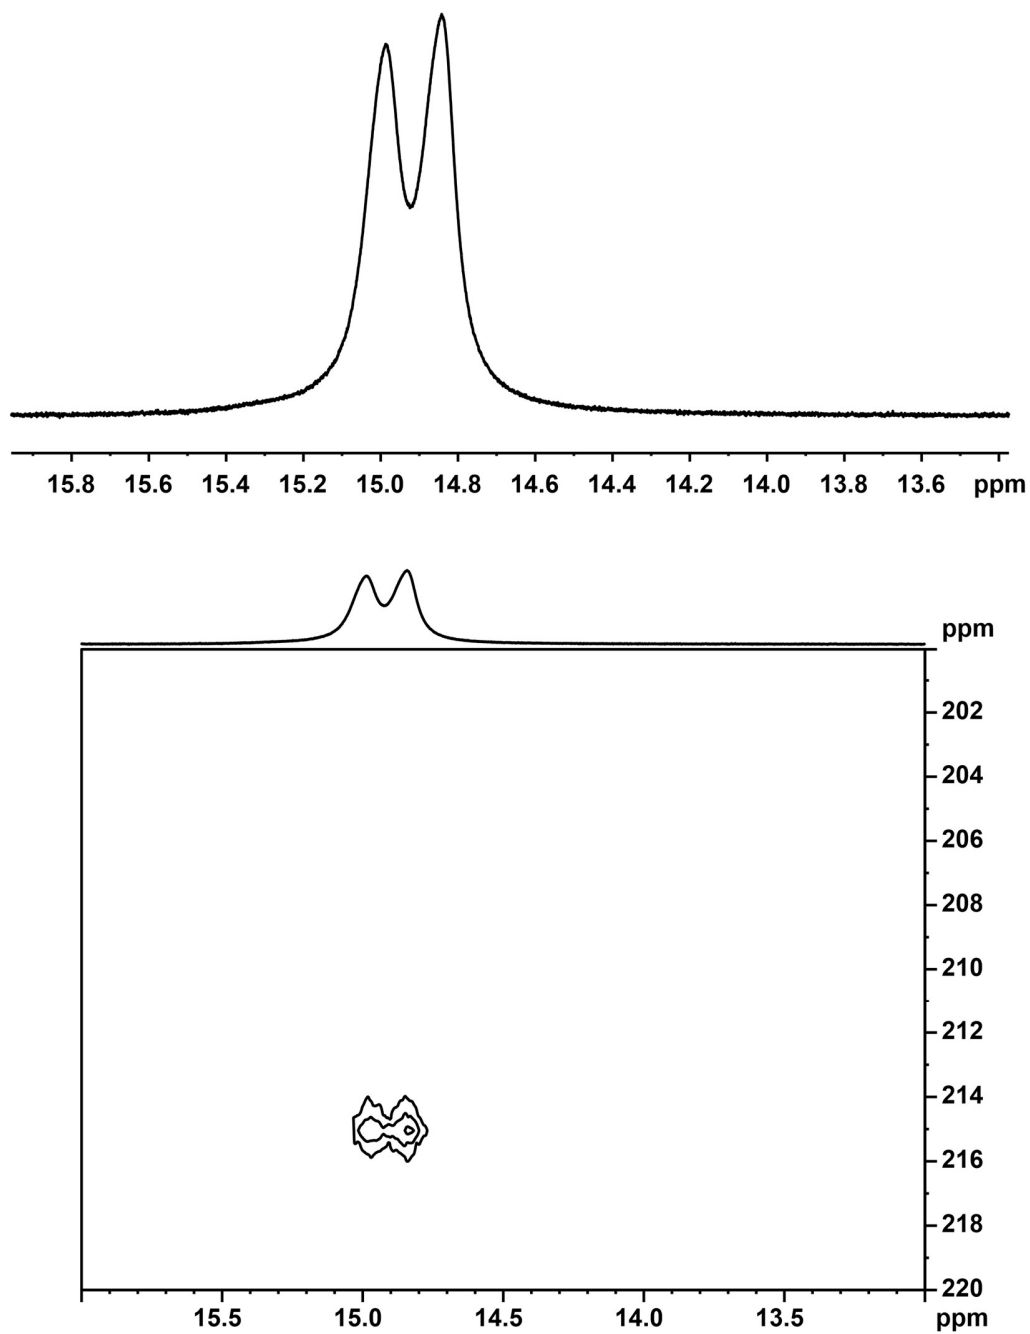

Figure S7: Low field section of the  $^1\text{H}$  spectrum of NTPA **1** and  $^{15}\text{N}$ -labeled imine **8** at 180 K and 600 MHz in  $\text{CD}_2\text{Cl}_2$ .  $^1\text{H}$   $^{15}\text{N}$  HMBC section for the of NTPA **1**/imine **8** complex at 180 K and 600 MHz in  $\text{CD}_2\text{Cl}_2$ . The section shows characteristic  $^1\text{H}$   $^{15}\text{N}$  HMBC cross signals for E- and Z-complex.

<sup>a</sup> Institut für Organische Chemie, Universität Regensburg, D-93053 Regensburg, Germany. E-mail: ruth.gschwind@chemie.uni-regensburg.de

<sup>b</sup> Institute of Physical and Theoretical Chemistry, University of Regensburg, D-93053, Germany

NTPA **1**/imine-**9** complex

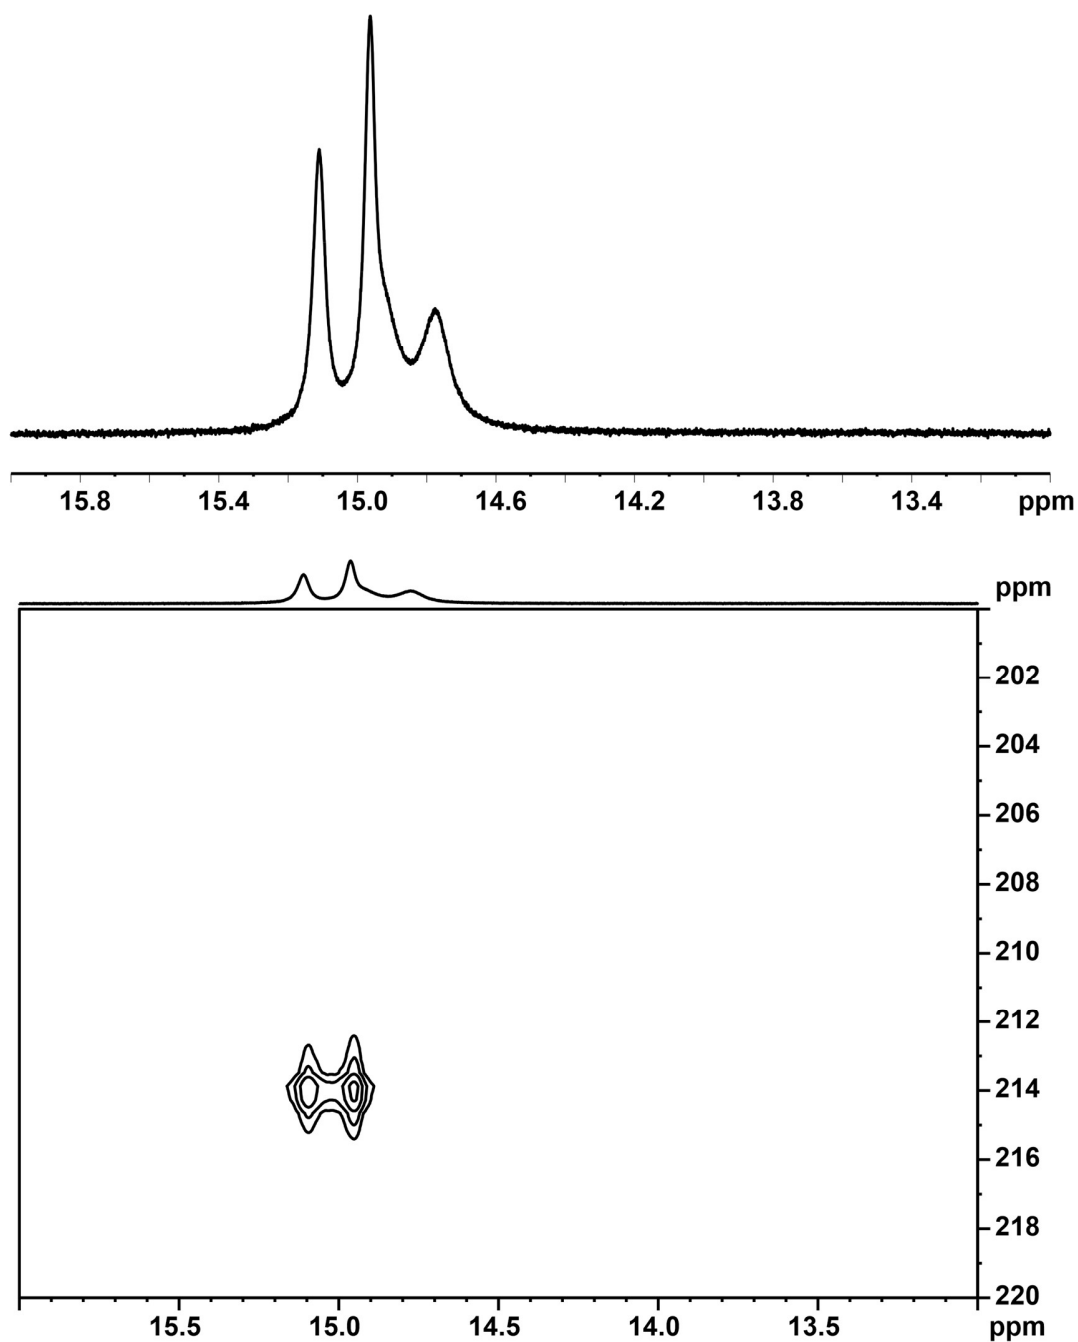

Figure S8: Low field section of the  $^1\text{H}$  spectrum of NTPA **1** and  $^{15}\text{N}$ -labeled imine **9** at 180 K and 600 MHz in  $\text{CD}_2\text{Cl}_2$ .  $^1\text{H}$   $^{15}\text{N}$  HMBC section for the of NTPA **1**/imine **9** complex at 180 K and 600 MHz in  $\text{CD}_2\text{Cl}_2$ . The section shows characteristic  $^1\text{H}$   $^{15}\text{N}$  HMBC cross signals for E- and Z-complex.

<sup>a</sup> Institut für Organische Chemie, Universität Regensburg, D-93053 Regensburg, Germany. E-mail: ruth.gschwind@chemie.uni-regensburg.de

<sup>b</sup> Institute of Physical and Theoretical Chemistry, University of Regensburg, D-93053, Germany

NTPA **1**/imine-**10** complex

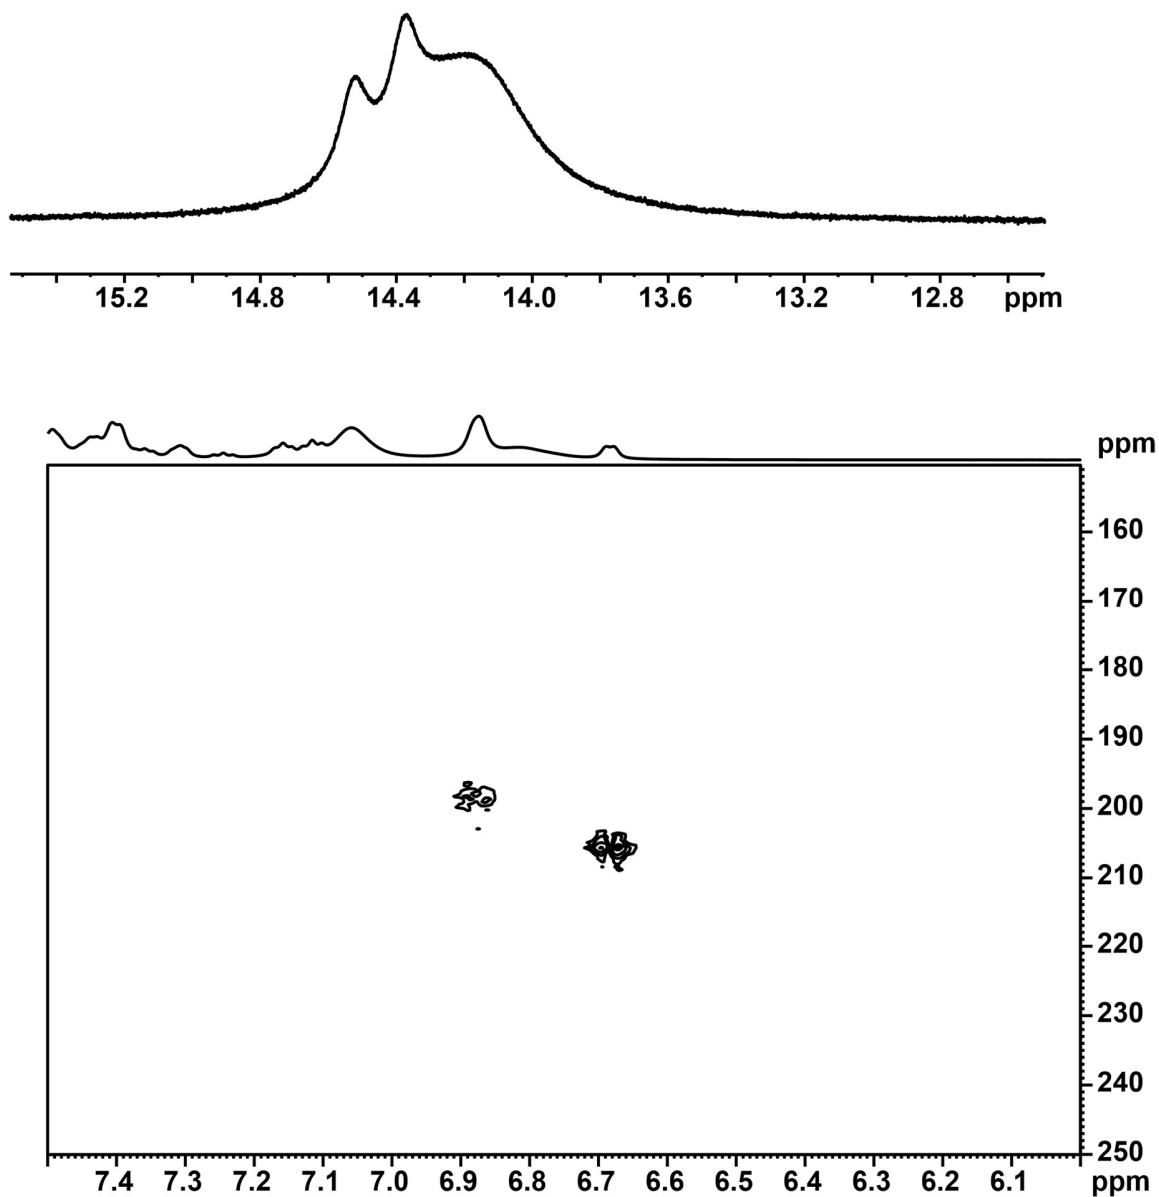

Figure S9: Low field section of the  $^1\text{H}$  spectrum of NTPA **1** and  $^{15}\text{N}$ -labeled imine **10** at 180 K and 600 MHz in  $\text{CD}_2\text{Cl}_2$ .  $^1\text{H}$   $^{15}\text{N}$  HMBC section for the of NTPA **1**/imine **10** complex at 180 K and 600 MHz in  $\text{CD}_2\text{Cl}_2$ . The section shows characteristic  $^1\text{H}$   $^{15}\text{N}$  HMBC cross signals for E- and Z-complex.

NTPA **1**/imine-**11** complex

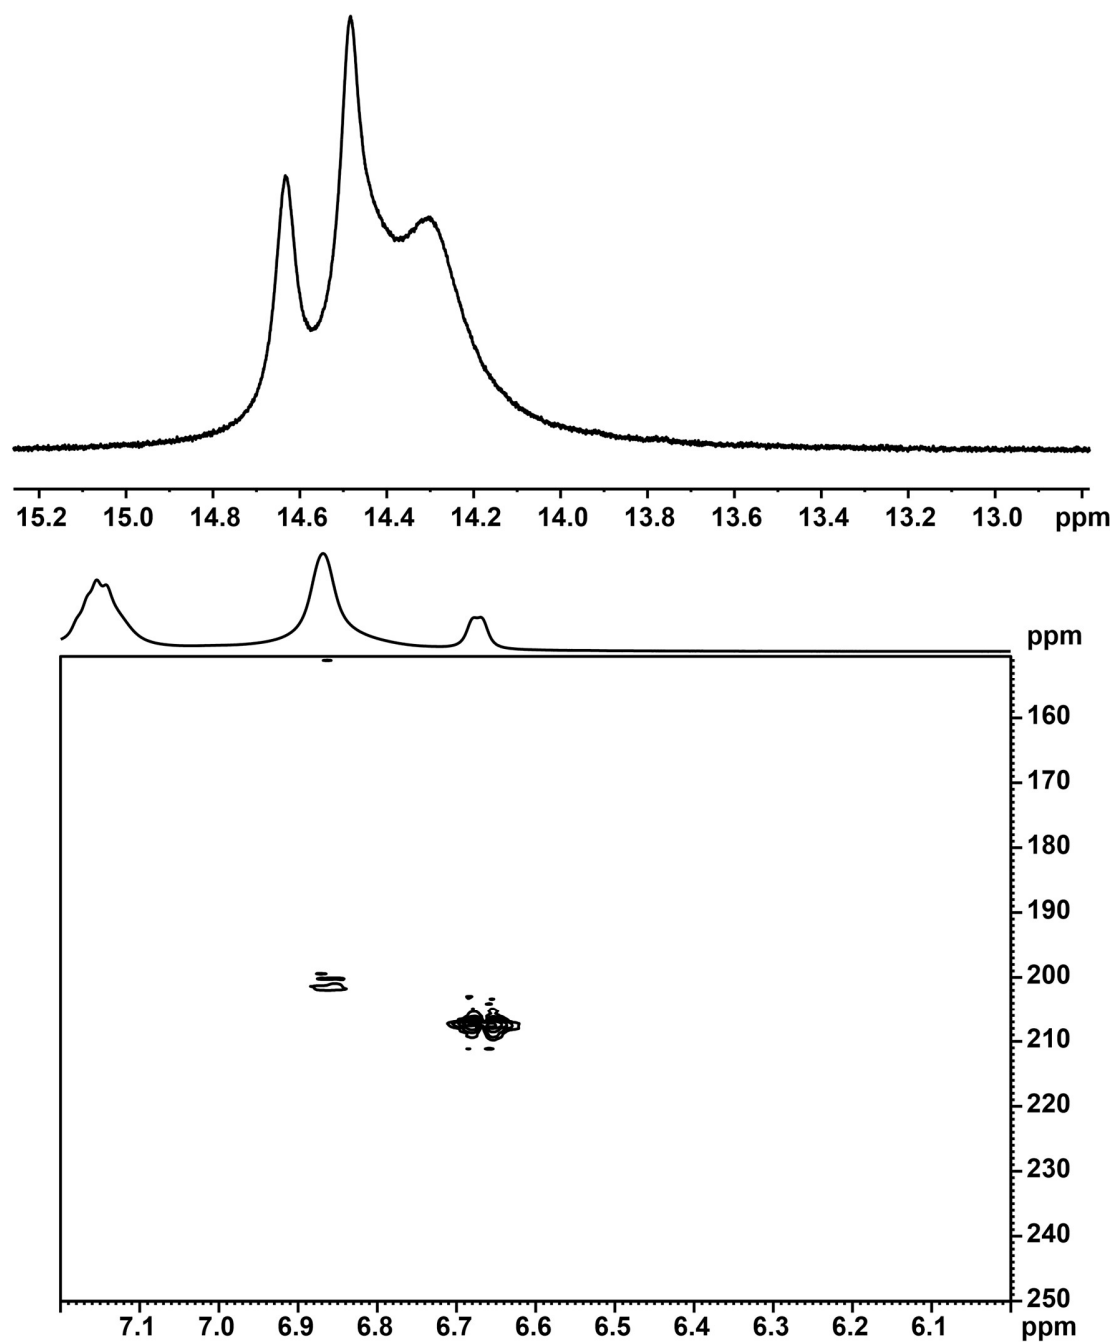

Figure S10: Low field section of the  $^1\text{H}$  spectrum of NTPA **1** and  $^{15}\text{N}$ -labeled imine **11** at 180 K and 600 MHz in  $\text{CD}_2\text{Cl}_2$ .  $^1\text{H}$   $^{15}\text{N}$  HMBC section for the of NTPA **1**/imine **11** complex at 180 K and 600 MHz in  $\text{CD}_2\text{Cl}_2$ . The section shows characteristic  $^1\text{H}$   $^{15}\text{N}$  HMBC cross signals for E- and Z-complex.

<sup>a</sup> Institut für Organische Chemie, Universität Regensburg, D-93053 Regensburg, Germany. E-mail: ruth.gschwind@chemie.uni-regensburg.de

<sup>b</sup> Institute of Physical and Theoretical Chemistry, University of Regensburg, D-93053, Germany

NTPA **1**/imine-**12** complex

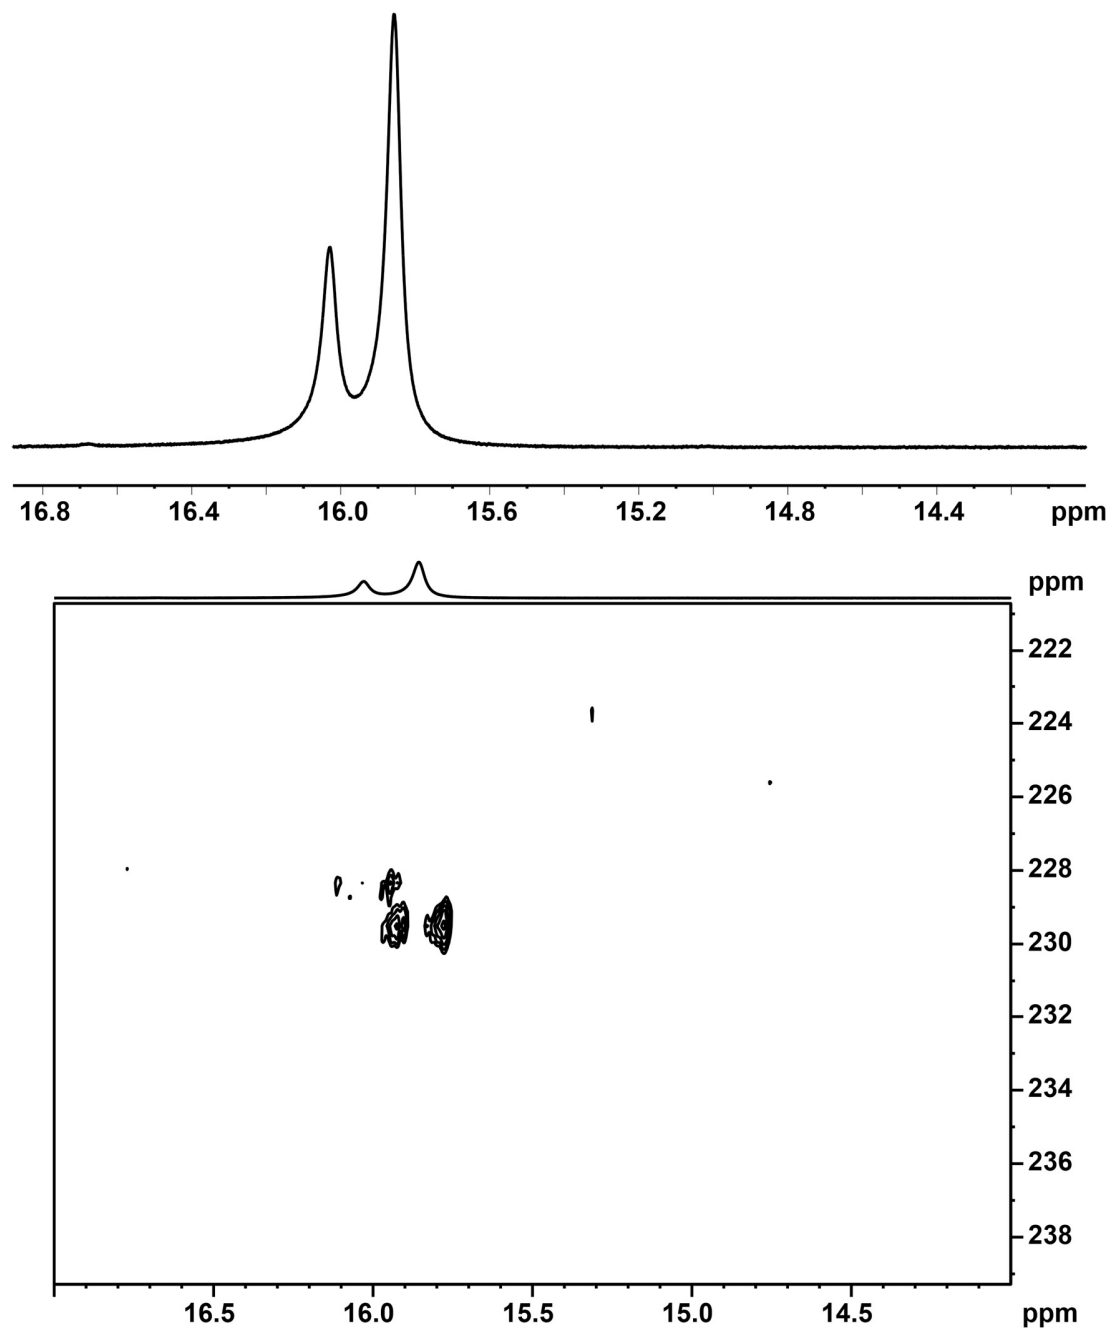

Figure S11: Low field section of the  $^1\text{H}$  spectrum of NTPA **1** and  $^{15}\text{N}$ -labeled imine **12** at 180 K and 600 MHz in  $\text{CD}_2\text{Cl}_2$ .  $^1\text{H}$   $^{15}\text{N}$  HMBC section for the of NTPA **1**/imine **12** complex at 180 K and 600 MHz in  $\text{CD}_2\text{Cl}_2$ . The section shows characteristic  $^1\text{H}$   $^{15}\text{N}$  HMBC cross signals for E- and Z-complex.

<sup>a</sup> Institut für Organische Chemie, Universität Regensburg, D-93053 Regensburg, Germany. E-mail: ruth.gschwind@chemie.uni-regensburg.de

<sup>b</sup> Institute of Physical and Theoretical Chemistry, University of Regensburg, D-93053, Germany

### NMR measurements at 273 K

All NMR spectra regarding the H-bond analysis were recorded at 180 K to reach the slow tumbling and slow exchange regime of the hydrogen-bonded protons. Since reactions using NTPA and CPA are carried out at higher temperatures as well, we also conducted NMR studies at 273 K whether temperature influences the binary complexes. At higher temperatures the H-bond appears as a single broad signal, preventing any further investigations on the H-bond situation (Figure S12, Figure S13). However, the H-bond is still present at this temperature indicating the formation of the binary complex at 273 K too (Figure S12), but the signal intensity of this signal is weak for intermolecular studies (NOESY/ROESY/HMBC). Furthermore, comparing the isomeric ratio of the binary *E*- and *Z*-complex at 180 K and 273 K (Figure S14), only slight changes are detected. Thus, the NMR spectra at 273 K show a complex formation and isomeric ratio like the one observed at 180 K. This is in accordance with the *ee*-values in Table 1 in the manuscript. In case no significant structure changes occur upon temperature reduction, the *ee* value is expected to increase at lower temperatures.

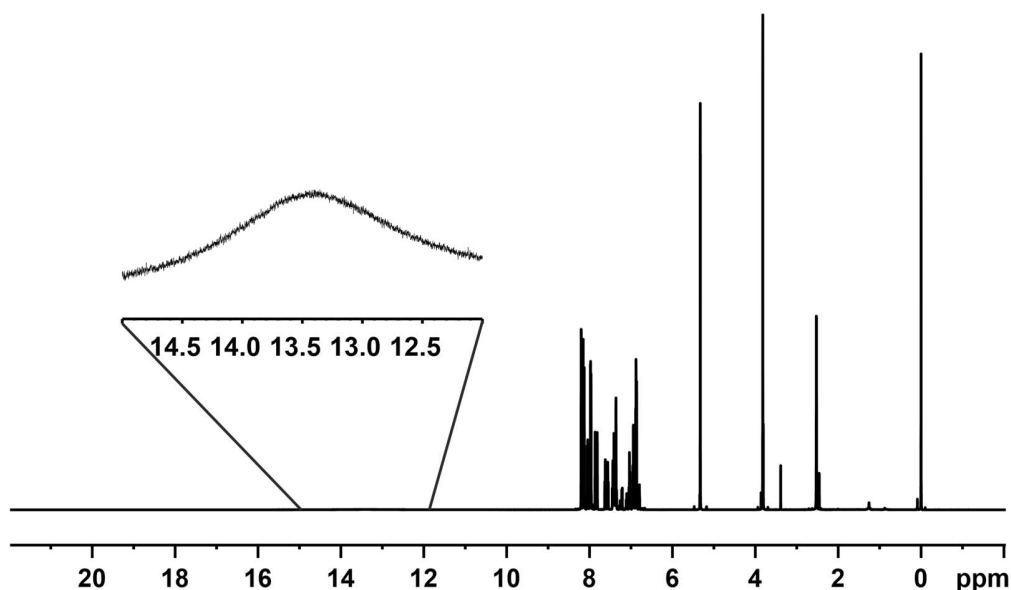

Figure S12:  $^1\text{H}$  spectrum of NTPA **1** and  $^{15}\text{N}$ -labeled imine **2** at 273 K and 600 MHz in  $\text{CD}_2\text{Cl}_2$ . At 273 K, the H-bond peak for the *E*- and *Z*-complex appeared as a single broad signal, preventing any further investigations on the H-bond situation.

<sup>a</sup> Institut für Organische Chemie, Universität Regensburg, D-93053 Regensburg, Germany. E-mail: ruth.gschwind@chemie.uni-regensburg.de

<sup>b</sup> Institute of Physical and Theoretical Chemistry, University of Regensburg, D-93053, Germany

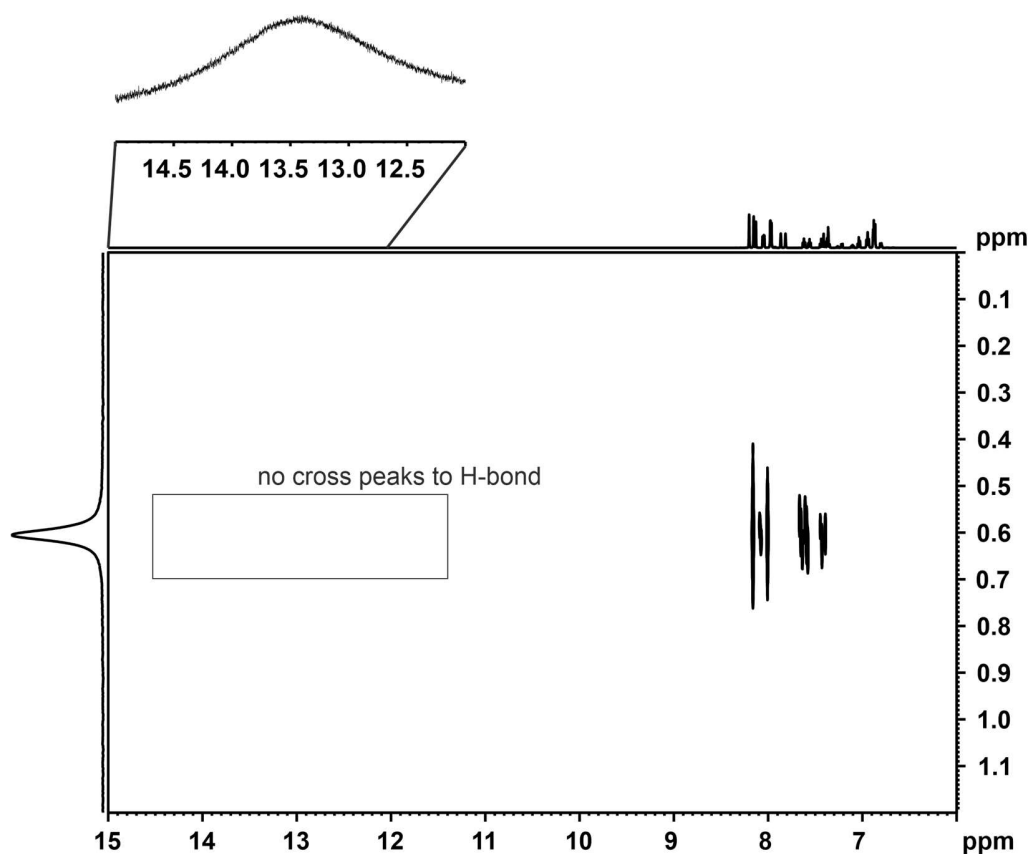

Figure S13:  $^1\text{H}$   $^{31}\text{P}$  HMBC spectrum of NTPA **1**/imine **2** complex at 273 K and 600 MHz in  $\text{CD}_2\text{Cl}_2$ . The section shows no  $^1\text{H}$   $^{31}\text{P}$  HMBC cross signals for the H-bond due to significant line broadening at higher temperatures.

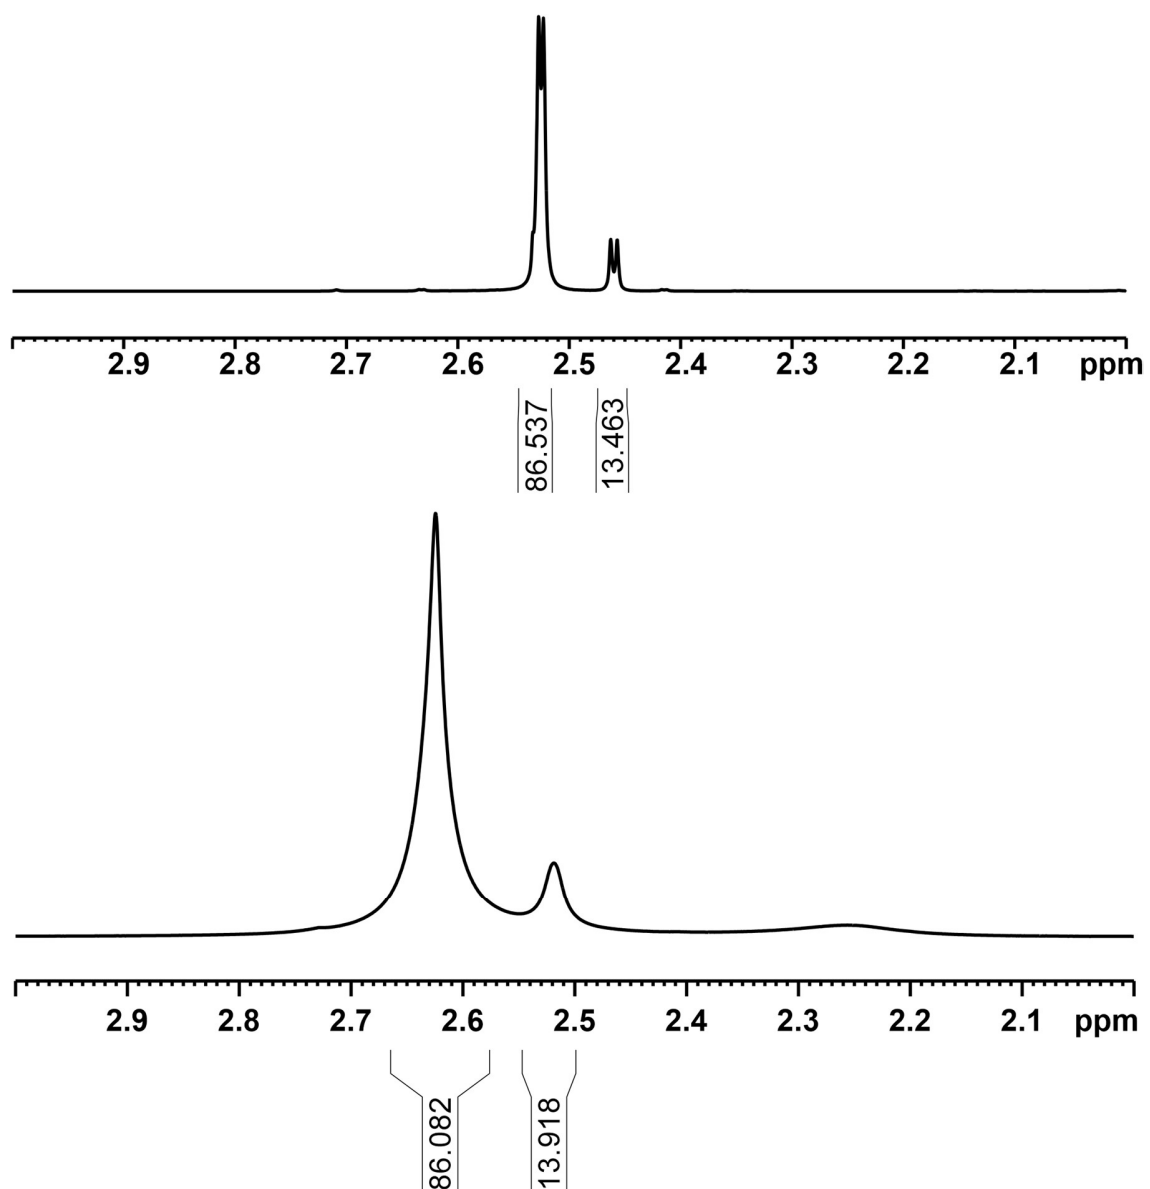

Figure S14: High field section of the  $^1\text{H}$  spectrum of NTPA **1** and  $^{15}\text{N}$ -labeled imine **2** at 273 K (top) and 180 K (bottom), 600 MHz in  $\text{CD}_2\text{Cl}_2$ . At both temperatures the binary E- and Z-complex is visible in a similar isomeric ratio.



## <sup>15</sup>N-labeling of NTPA 1

### Synthesis

The <sup>15</sup>N-labeled NTPA 1 was synthesized according to the procedure of Yamamoto et al.<sup>14</sup>

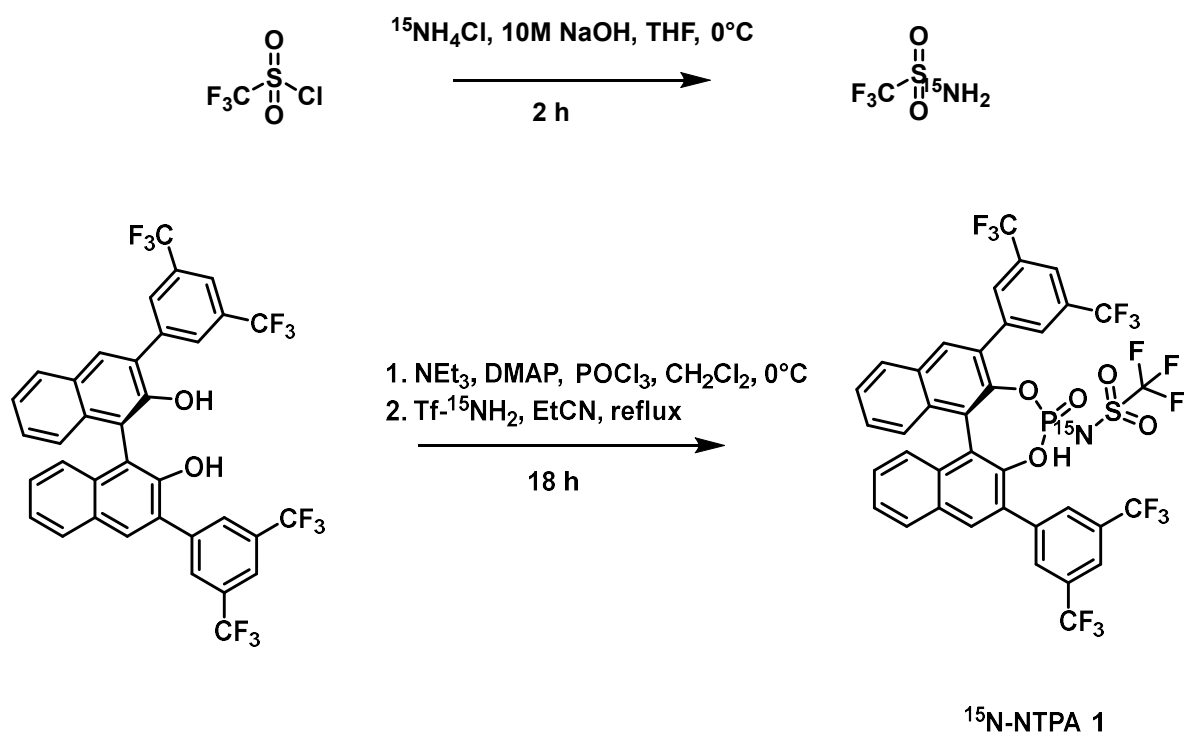

<sup>15</sup>N-labeled NTPA 1 was obtained as a beige solid (48 %). <sup>1</sup>H, <sup>19</sup>F and <sup>31</sup>P NMR data were in accordance with literature.<sup>15</sup>

**<sup>1</sup>H-NMR** (400.1 MHz, CD<sub>3</sub>CN) δH = 8.26 (s, 2H), 8.2 (m, 3H), 8.18 (s, 1H), 8.01 (d, 2H, <sup>2</sup>J<sub>HH</sub> = 8.29 Hz), 7.92 (s, 2H), 7.48 (m, 2H), 7.33 – 7.18 ppm (m, 4H).

**<sup>19</sup>F-NMR** (376 MHz, CD<sub>3</sub>CN) δF = -62.0 (12F), -79.5 ppm (3F).

**<sup>31</sup>P-NMR** (202 MHz, CD<sub>3</sub>CN) δP = 1.25 ppm.

**<sup>15</sup>N-NMR** (40.5 MHz, CD<sub>3</sub>CN) δN = 101.87 ppm.

<sup>a</sup> Institut für Organische Chemie, Universität Regensburg, D-93053 Regensburg, Germany. E-mail: ruth.gschwind@chemie.uni-regensburg.de

<sup>b</sup> Institute of Physical and Theoretical Chemistry, University of Regensburg, D-93053, Germany

## Comparison of $^{15}\text{N}$ -labeled and not labeled NTPA 1

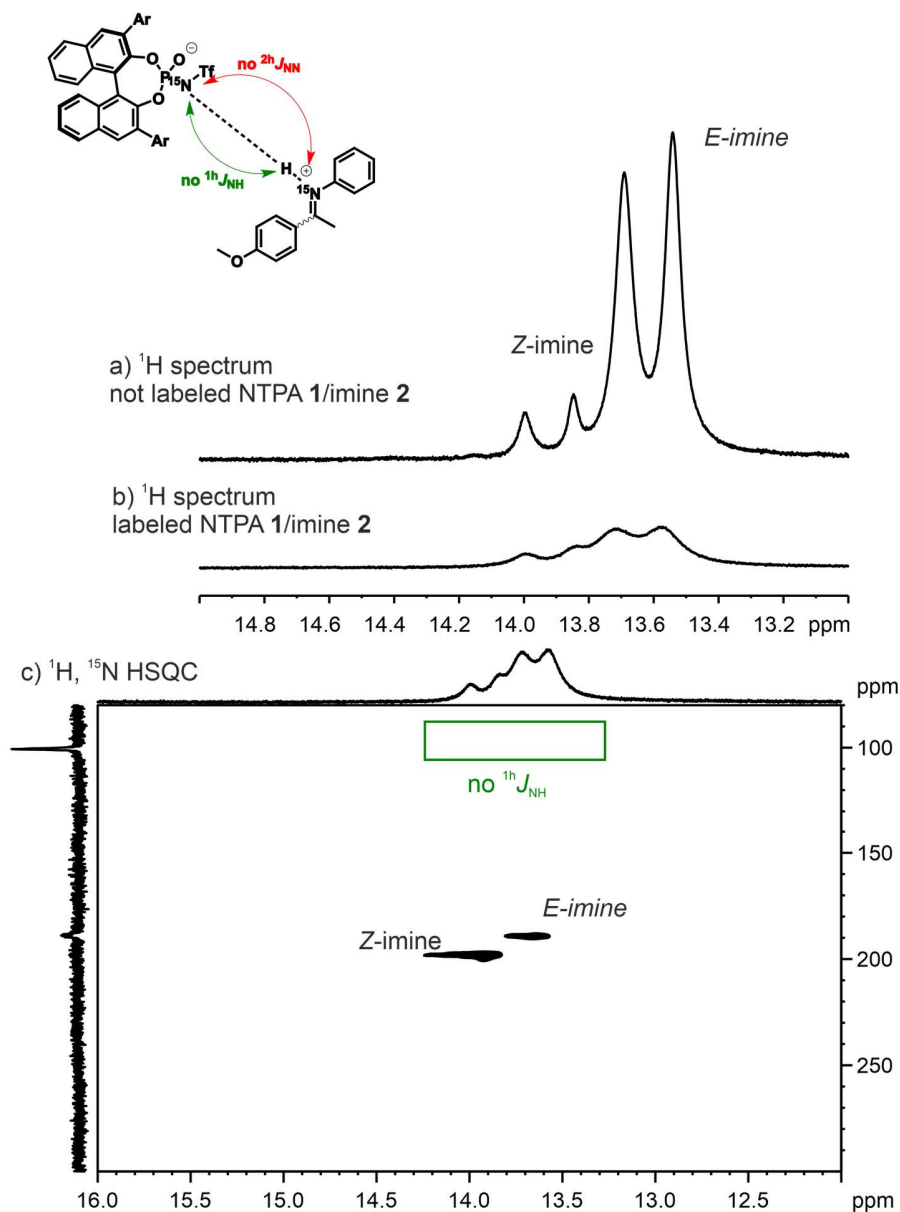

Figure S15: a) Low field section of the  $^1\text{H}$  spectrum of NTPA 1 and  $^{15}\text{N}$ -labeled imine 2 at 180 K and 600 MHz in  $\text{CD}_2\text{Cl}_2$ . b) Low field section of the  $^1\text{H}$  spectrum of  $^{15}\text{N}$ -labeled NTPA 1 and  $^{15}\text{N}$ -labeled imine 2 at 180 K and 600 MHz in  $\text{CD}_2\text{Cl}_2$ . c)  $^1\text{H}$ ,  $^{15}\text{N}$ -HSQC section of  $^{15}\text{N}$ -labeled NTPA 1 and  $^{15}\text{N}$ -labeled imine 2 at 180 K and 600 MHz in  $\text{CD}_2\text{Cl}_2$ . The section shows characteristic  $^1\text{H}$ ,  $^{15}\text{N}$ -HSQC cross signals between the nitrogen of the imine and the proton but not for the nitrogen of the NTPA catalyst.

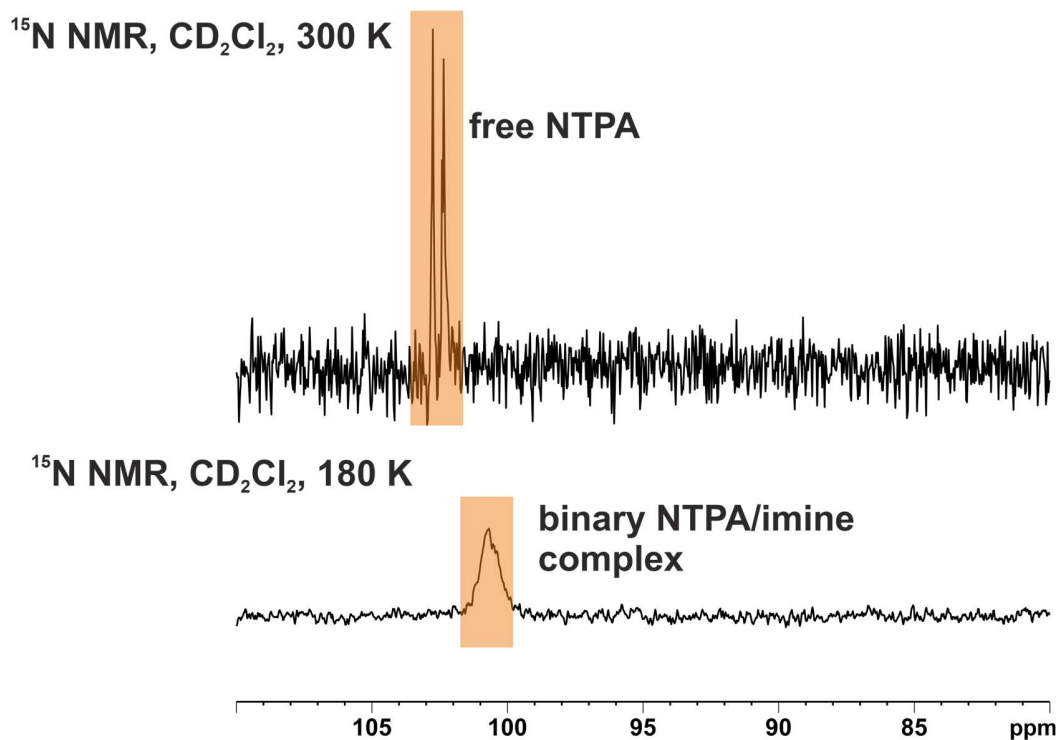

Figure S16: <sup>15</sup>N spectrum of free NTPA **1** in CD<sub>2</sub>Cl<sub>2</sub> at 300 K and <sup>15</sup>N spectrum of the binary complex NTPA **1**/imine **2** in CD<sub>2</sub>Cl<sub>2</sub> at 180 K. The <sup>15</sup>N signal in the binary complex is slightly broadened.

## Qualitative Detection of ${}^2hJ_{PH}$ scalar coupling

The presence of a cross signal in the  ${}^1H,{}^{31}P$ -HMBC does not serve as a direct indication for a “covalent character”. Theoretical studies suggest that for Fermi contact interaction - the spin polarization of nuclei mediated by electrons - covalent bonding between these nuclei is not an essential requirement.<sup>16,17</sup> The magnetization transfer between both involved nuclei can theoretically be mediated by relaxation interference of the  ${}^1H$  chemical shift anisotropy ( ${}^1H$ -CSA) and  ${}^1H$ - ${}^{31}P$  dipolar interactions (DD) instead of a Fermi contact interaction (scalar coupling). Several NMR experimental studies on trans hydrogen bond scalar couplings in bio macromolecules suggest this phenomenon.<sup>2,18-21</sup> To ensure that the measured magnetization transfer between  ${}^1H$  and  ${}^{31}P$  is caused mainly by scalar coupling between  ${}^1H$  and  ${}^{31}P$  and is not mediated by a cross correlation between the  ${}^1H$ -CSA and the  ${}^1H,{}^{31}P$  dipole interaction, modified 1D  ${}^1H,{}^{31}P$ -HMBC experiments were carried out. For this purpose, if it is in fact a  ${}^2hJ_{PH}$  scalar coupling, Löhner et al. developed modified  ${}^1H,{}^{31}P$ -HMBC pulse sequences for the detection of scalar couplings.<sup>2</sup> Originally these pulse sequences were developed for the detection of scalar couplings across  $NH\cdots OP$  and  $OH\cdots OP$  hydrogen bonds in flavoproteins.<sup>2</sup> The modified 1D  ${}^1H,{}^{31}P$  HMBC experiments were also used by our group for the detection of  ${}^2hJ_{PH}$  scalar coupling in CPA/imine complexes.<sup>4</sup>

---

<sup>a</sup> Institut für Organische Chemie, Universität Regensburg, D-93053 Regensburg, Germany. E-mail: ruth.gschwind@chemie.uni-regensburg.de

<sup>b</sup> Institute of Physical and Theoretical Chemistry, University of Regensburg, D-93053, Germany

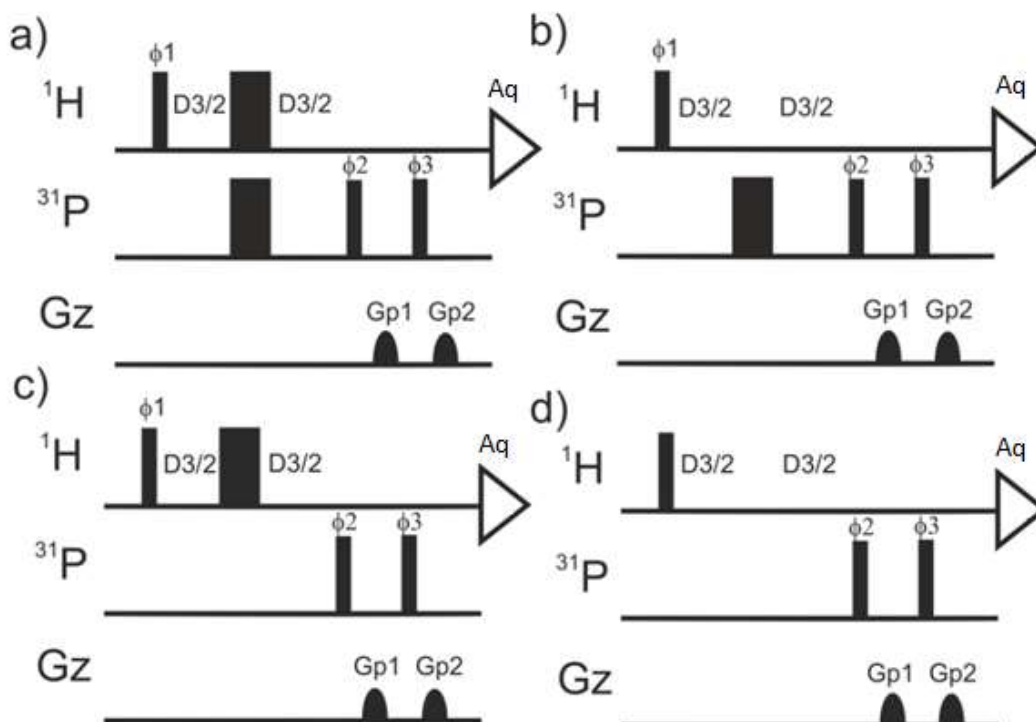

Figure S17: Modified 1D  $^1\text{H},^{31}\text{P}$ -HMBCs developed by Löhner et al.<sup>2</sup> a) Polarization transfer is mediated only by scalar coupling b) and c) Polarization transfer is mediated by  $^1\text{H}$ -CSA and  $^1\text{H}$   $^{31}\text{P}$ -DD cross relaxation. d) Polarization transfer is mediated by the sum of scalar coupling and the  $^1\text{H}$ -CSA and  $^1\text{H}$   $^{31}\text{P}$ -DD cross relaxation. Thin and wide bars indicate  $90^\circ$  and  $180^\circ$  pulses. All phases are  $x$ , unless otherwise specified. Pulse phases:  $\phi 1 = x, x, -x, -x$ ;  $\phi 2 = x, -x$ ;  $\phi 3 = 4(x), 4(-x)$ .

<sup>a</sup> Institut für Organische Chemie, Universität Regensburg, D-93053 Regensburg, Germany. E-mail: ruth.gschwind@chemie.uni-regensburg.de

<sup>b</sup> Institute of Physical and Theoretical Chemistry, University of Regensburg, D-93053, Germany

## Chemical Exchange

a) free imine **2**

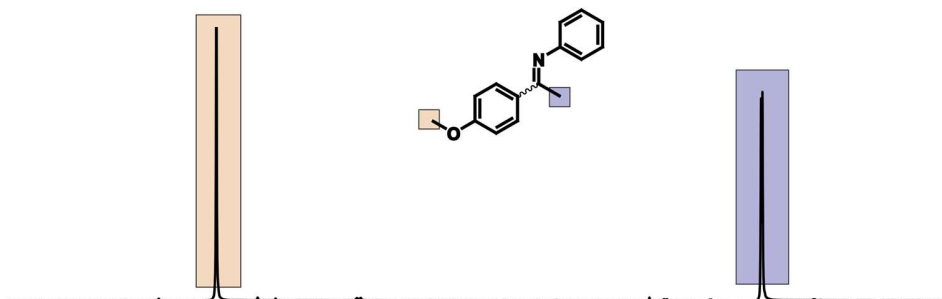

b) NTPA **1**/imine **2** (1:1 40 mM)

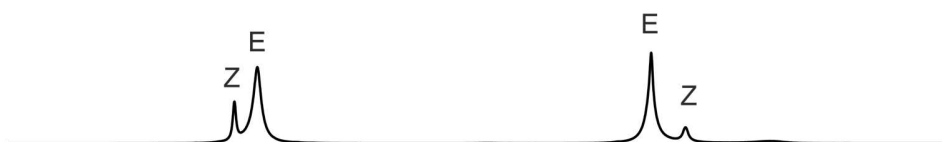

c) NTPA **1**/imine **2** (1:2, 20:40 mM)

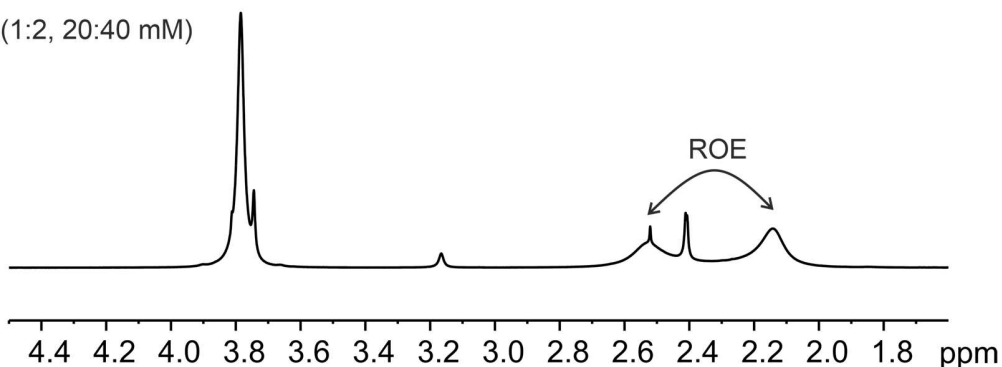

Figure S18: a)  $^1\text{H}$  spectrum of  $^{15}\text{N}$ -labeled imine **2** at 293 K and 600 MHz in  $\text{CD}_2\text{Cl}_2$ . b)  $^1\text{H}$  spectrum of NTPA **1** and  $^{15}\text{N}$ -labeled imine **2** at 180 K and 600 MHz in  $\text{CD}_2\text{Cl}_2$ . No EXSY peaks between NTPA **1**/imine **2** complexes and free imine **2** were observed in a 1:1 sample. c) An excess of the imine **2** in the samples revealed EXSY peaks between the NTPA **1**/imine **2** complex and the free E-imine.

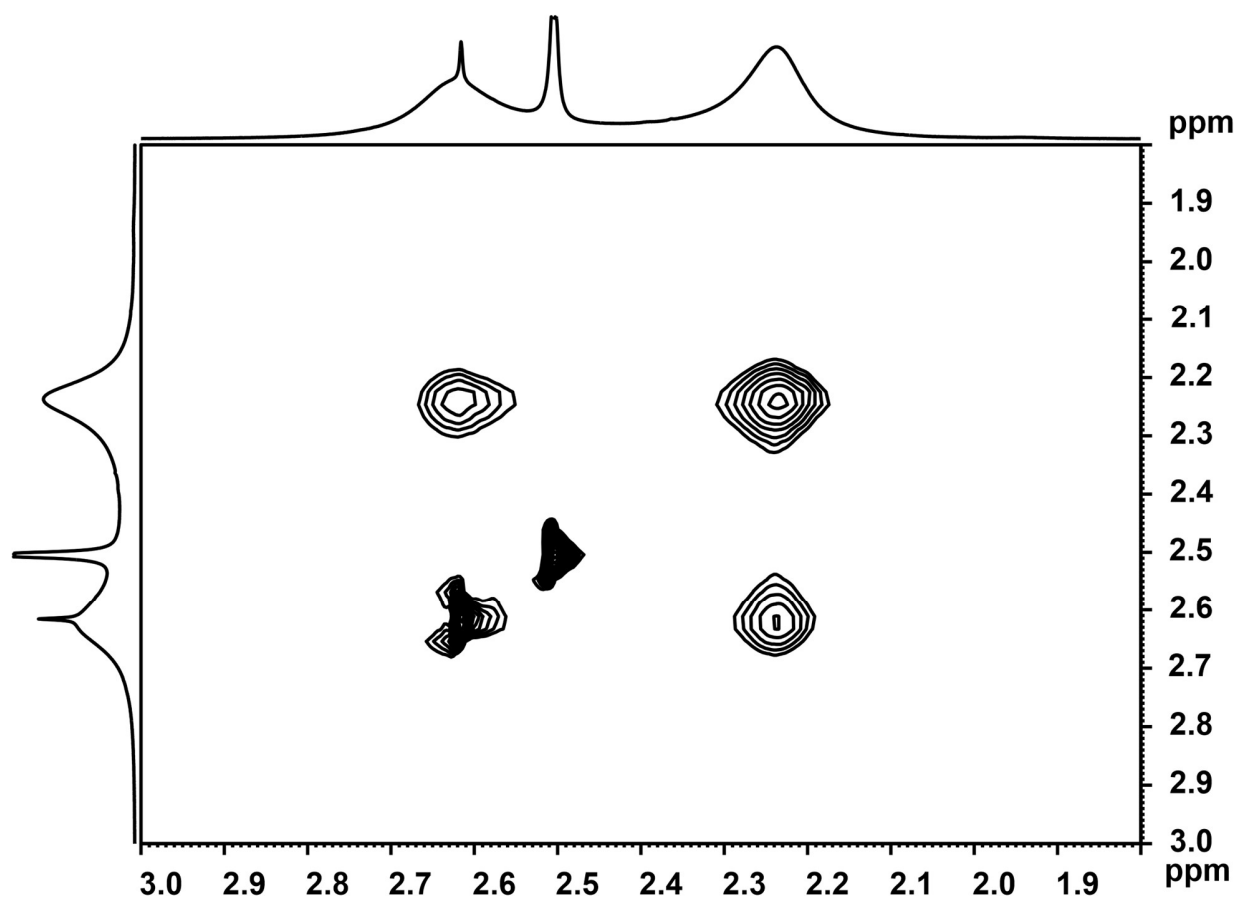

Figure S19:  $^1\text{H}$ ,  $^1\text{H}$ -ROESY section for the of NTPA **1**/imine **2** complex at 180 K and 600 MHz in  $\text{CD}_2\text{Cl}_2$ . The section shows exchange signals between the NTPA **1**/imine **2** complex and the free *E*-imine.





## Structure Identification of the Binary Complex

### Binary NTPA 1/imine 2 complex

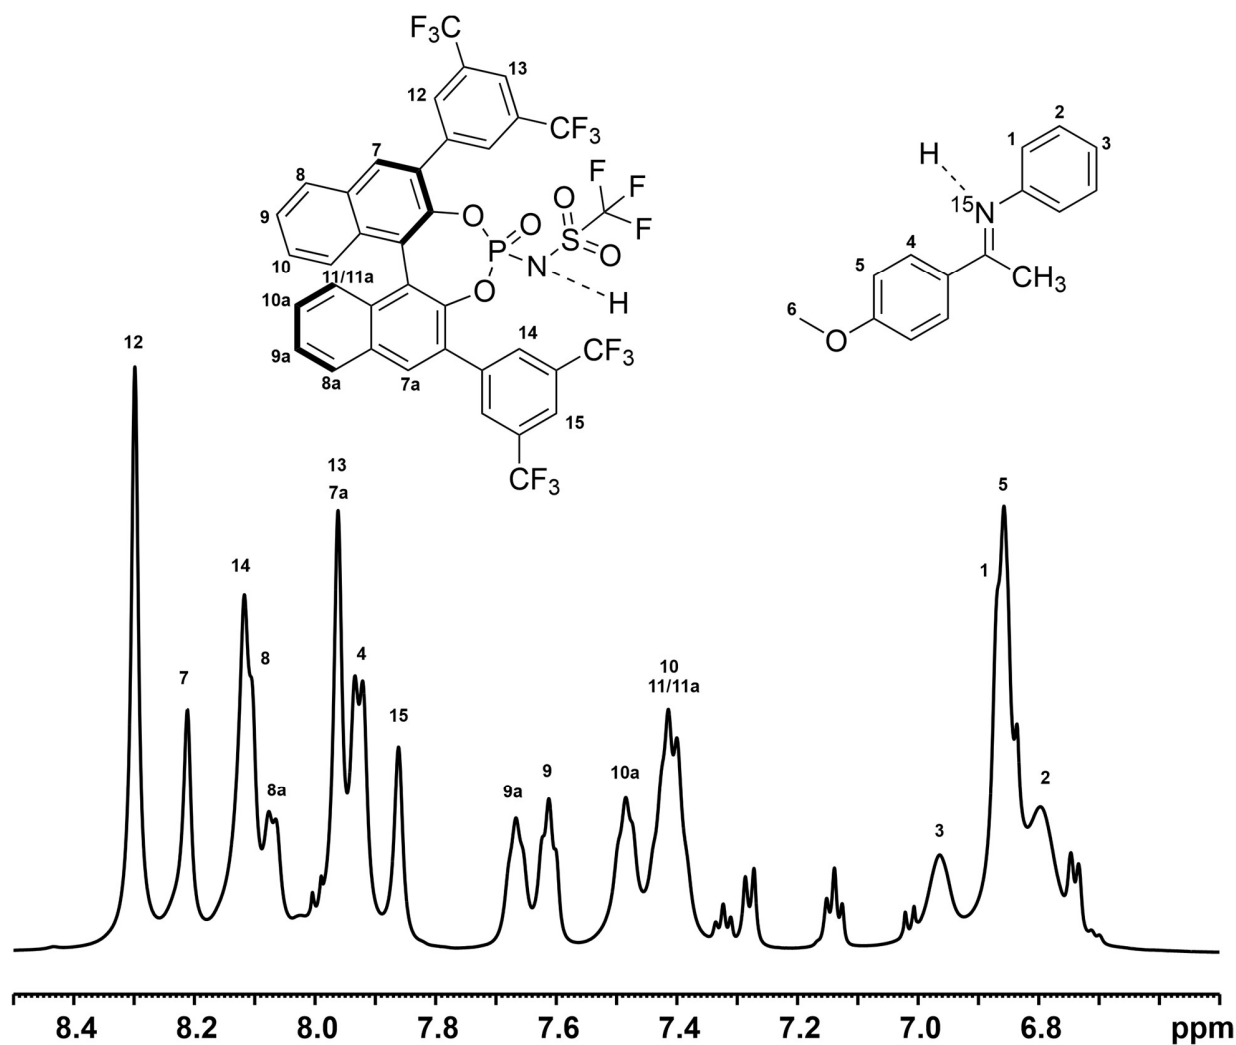

Figure S20:  $^1\text{H-NMR}$  section for the of NTPA 1/imine 2 complex at 180 K and 600 MHz in  $\text{CD}_2\text{Cl}_2$ .

## Characteristic $^1\text{H}$ , $^1\text{H}$ -NOESY cross signals

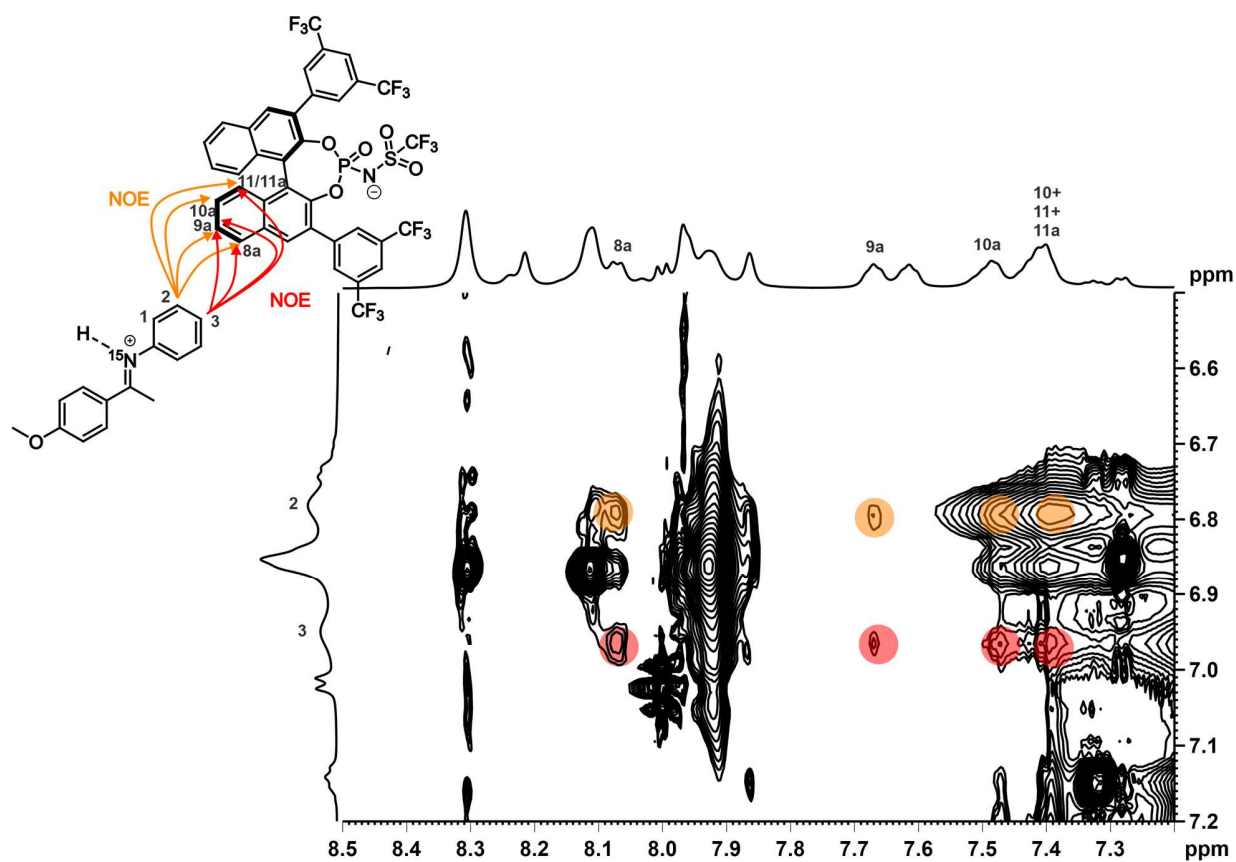

Figure S21:  $^1\text{H}$ ,  $^1\text{H}$ -NOESY section for the of NTPA 1/imine 2 complex at 180 K and 600 MHz in  $\text{CD}_2\text{Cl}_2$ . The section shows characteristic NOE cross signals between the NTPA backbone and the imine.

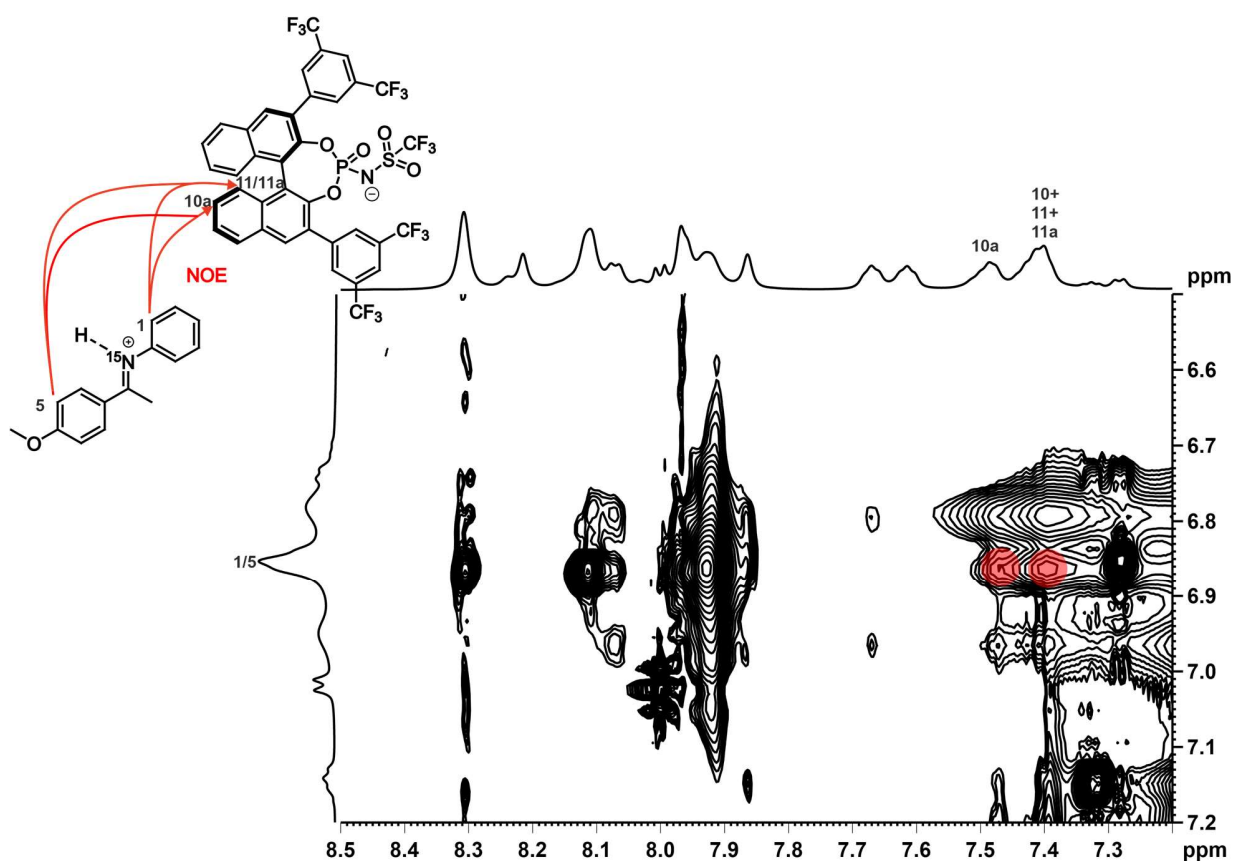

Figure S22:  $^1\text{H}$ ,  $^1\text{H}$ -NOESY section for the of NTPA **1**/imine **2** complex at 180 K and 600 MHz in  $\text{CD}_2\text{Cl}_2$ . The section shows characteristic NOE cross signals between the NTPA backbone and the imine.

### Characteristic $^1\text{H}$ , $^{19}\text{F}$ -HOESY cross signals

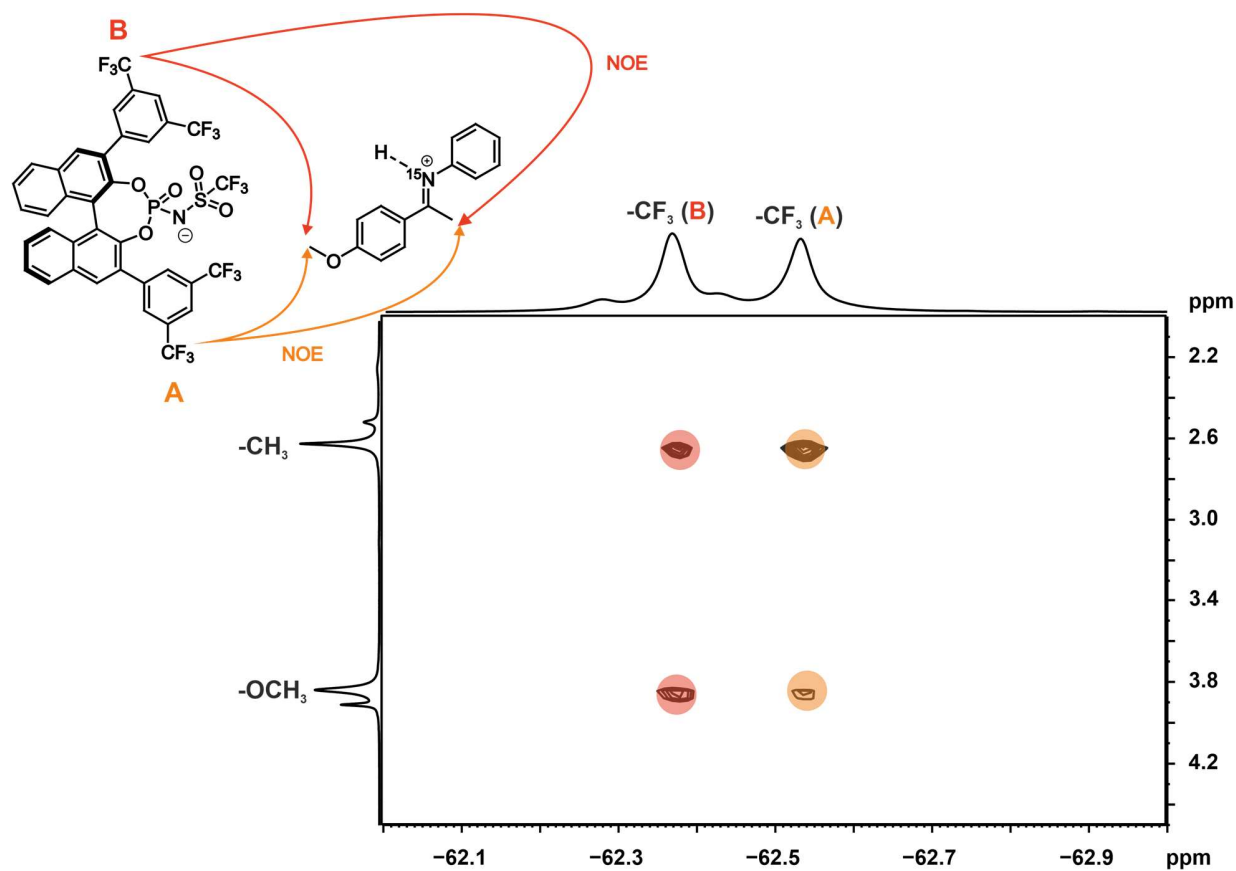

Figure S23:  $^1\text{H}$ ,  $^{19}\text{F}$ -HOESY section for the of NTPA 1/imine 2 complex at 180 K and 600 MHz in  $\text{CD}_2\text{Cl}_2$ . The section shows characteristic NOE cross signals between the NTPA backbone and the imine.

<sup>a</sup> Institut für Organische Chemie, Universität Regensburg, D-93053 Regensburg, Germany. E-mail: ruth.gschwind@chemie.uni-regensburg.de

<sup>b</sup> Institute of Physical and Theoretical Chemistry, University of Regensburg, D-93053, Germany

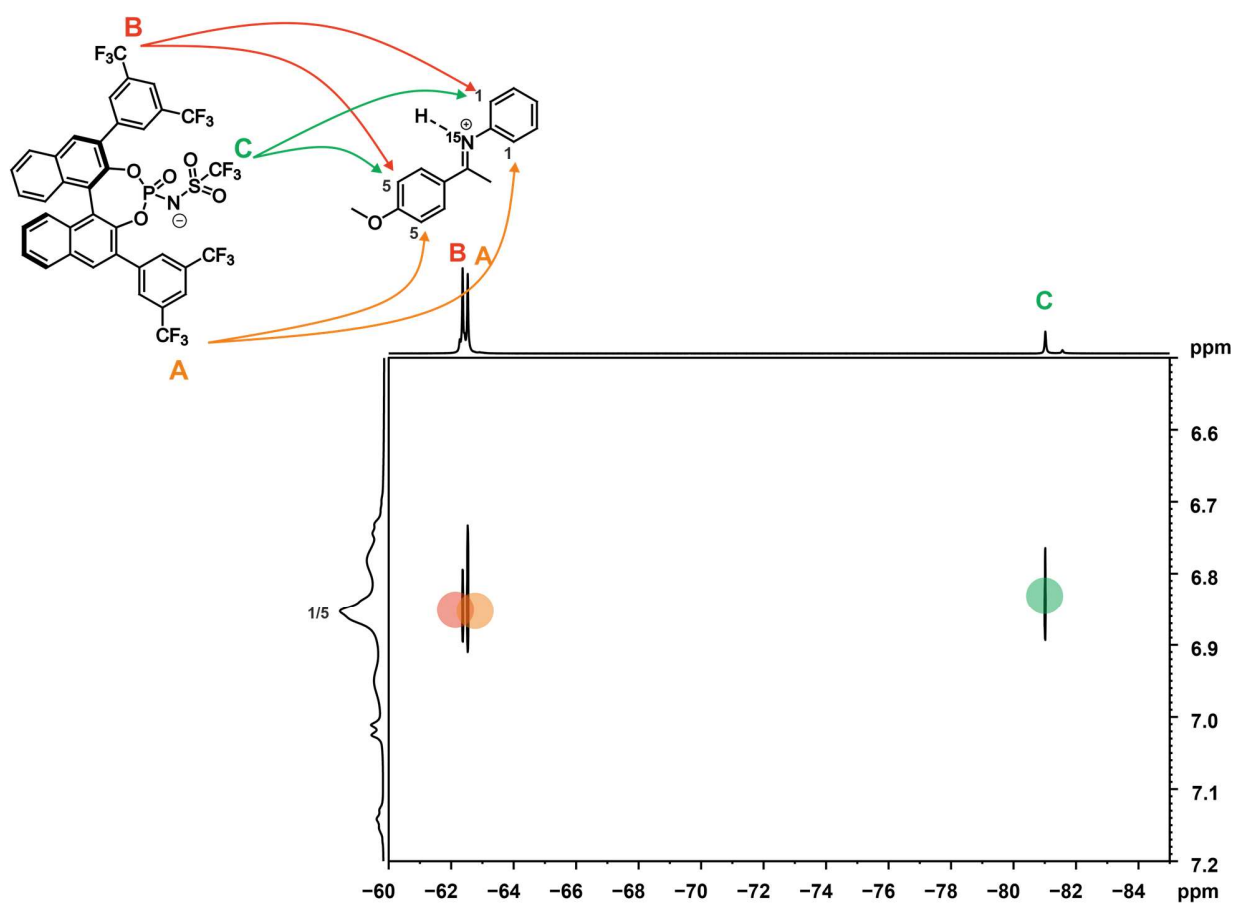

Figure S24:  $^1\text{H}$ ,  $^{19}\text{F}$ -HOESY section for the of NTPA 1/imine 2 complex at 180 K and 600 MHz in  $\text{CD}_2\text{Cl}_2$ . The section shows characteristic NOE cross signals between the NTPA backbone and the imine.

## Asymmetric Mukaiyama-Mannich reaction

### Reaction

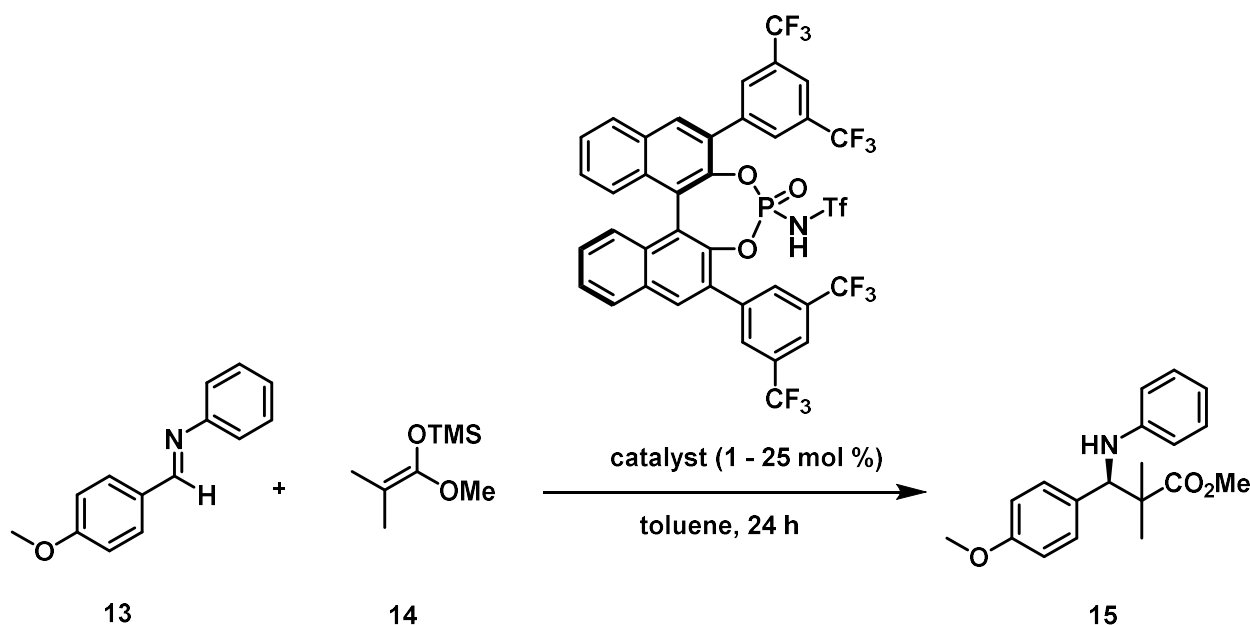

To a solution of aldimine **13** (42.2 mg, 0.2 mmol) and the NTPA catalyst **1** (0.002 – 0.05 mmol) in dry toluene at temperatures from -80 °C up to 80 °C was added dropwise a solution of ketene silyl acetal **14** (69.8 mg, 81.2  $\mu$ L, 0.4 mmol) under argon atmosphere. After being stirred at the temperature for 24 hours, the mixture was quenched by addition of saturated  $\text{NaHCO}_3$  (0.4 mL). THF (10 mL) and 1 M HCl (2 mL) was added at room temperature, the mixture was stirred for one hour and extracted with DCM (2x 10 mL). The combined organic layers were washed with brine, dried over anhydrous  $\text{Na}_2\text{SO}_4$  and concentrated under reduced pressure. The crude product was purified by column chromatography ( $\text{SiO}_2$ , hexane:ethylacetate = 3:1). The product was obtained as a white solid and enantiomeric excess was determined by Daciel Chiralpak column.  $^1\text{H}$  and  $^{13}\text{C}$  NMR data was in accordance with literature.<sup>22</sup>

As our focus was directed towards the enantioselectivity of the reaction, given that chemical yields of up to 95% have already been reported<sup>22</sup>, we isolated the product only once in a yield of 70%. Thus, in all reactions where we varied catalyst loading and temperature, the

<sup>a</sup> Institut für Organische Chemie, Universität Regensburg, D-93053 Regensburg, Germany. E-mail: ruth.gschwind@chemie.uni-regensburg.de

<sup>b</sup> Institute of Physical and Theoretical Chemistry, University of Regensburg, D-93053, Germany

enantiomeric excess was directly determined after the work up, without undergoing purification via column chromatography or determination of the chemical yield.

**<sup>1</sup>H-NMR** (400.1 MHz, CDCl<sub>3</sub>) δH = δ = 7.18 (d, 2H, <sup>2</sup>J<sub>HH</sub> = 8.73), 7.05 (t, 2H, <sup>2</sup>J<sub>HH</sub> = 7.63), 6.81 (d, 2H, <sup>2</sup>J<sub>HH</sub> = 8.62), 6.61 (t, 1H, <sup>2</sup>J<sub>HH</sub> = 7.20), 6.49 (d, 2H, <sup>2</sup>J<sub>HH</sub> = 7.72), 4.74 (brs, 1H), 4.44 (brs, 1H), 3.77 (s, 3H), 3.65 (s, 3H), 1.26 (s, 3H), 1.15 ppm (s, 3H).

**<sup>13</sup>C-NMR** (100.6 MHz, CDCl<sub>3</sub>): δC = = 177.1, 158.8, 147.0, 131.1, 129.2, 129.0, 117.2, 113.7, 113.4, 63.8, 55.0, 52.1, 47.2, 24.4, 20.6 ppm.

### HPLC Conditions

The conditions for separating major and minor enantiomer were previously established in the group of Yamamoto.<sup>22</sup> HPLC, Daciel Chiralpak YA-H, Hexane:*i*-PrOH = 99:1, Flow rate 0.5 mL/min, λ = 220 nm. t<sub>R</sub> = 29.287 min (minor isomer), t<sub>R</sub> = 41.787 min (major isomer).<sup>22</sup>

In this work, the product **15** consisting of major and minor isomer was isolated and detected by HPLC chromatography. Conditions were later optimized to Hexane:*i*-PrOH = 97:3, Flow rate 0.5 mL/min, Daciel Chiralpak IA. Major and minor isomer in all reactions were checked with a diode array detector. For all reactions the resulting UV-spectrum is shown below the HPLC chromatogram.

---

<sup>a</sup> Institut für Organische Chemie, Universität Regensburg, D-93053 Regensburg, Germany. E-mail: ruth.gschwind@chemie.uni-regensburg.de

<sup>b</sup> Institute of Physical and Theoretical Chemistry, University of Regensburg, D-93053, Germany

## HPLC chromatograms

Asymmetric Mukaiyama-Mannich reaction with aldimine **13** and ketene silyl acetal **14** at r.t and 10% catalyst loading.

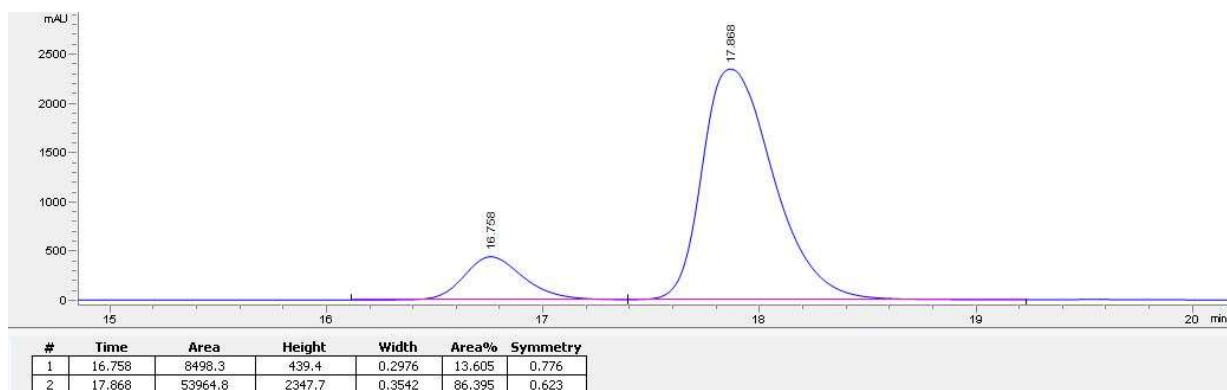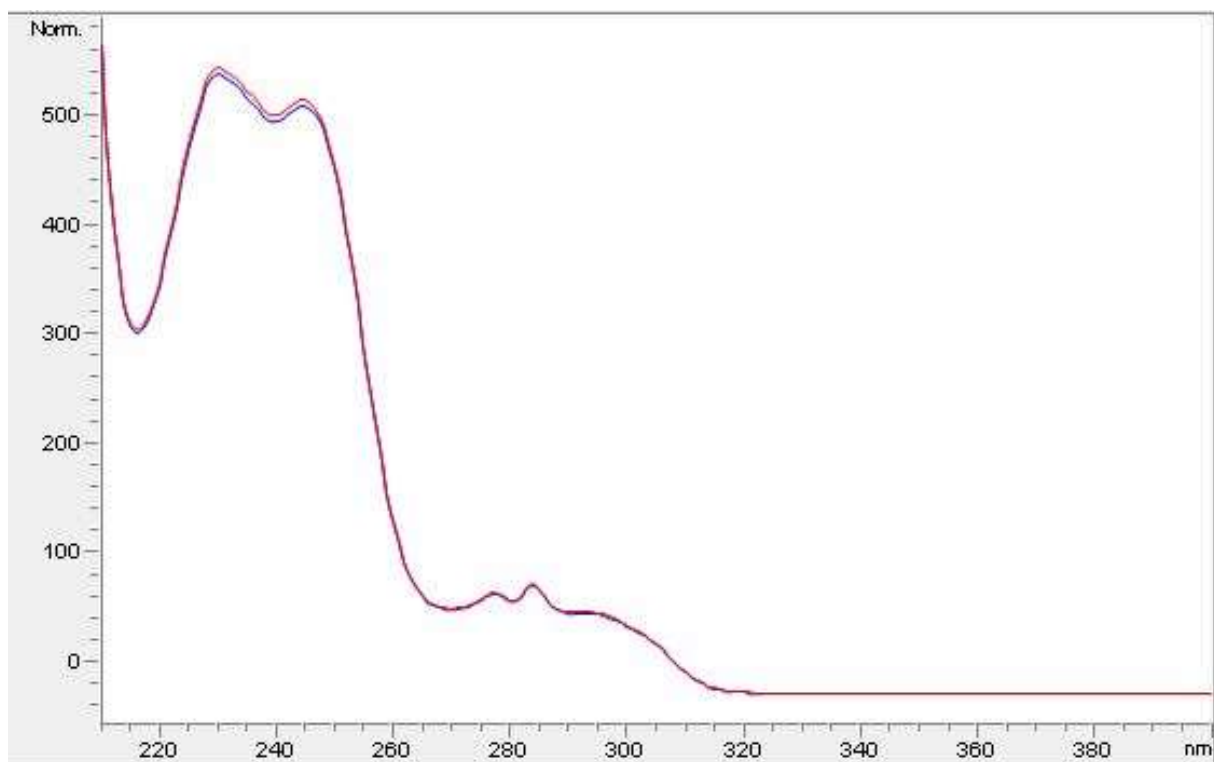

<sup>a</sup> Institut für Organische Chemie, Universität Regensburg, D-93053 Regensburg, Germany. E-mail: ruth.gschwind@chemie.uni-regensburg.de

<sup>b</sup> Institute of Physical and Theoretical Chemistry, University of Regensburg, D-93053, Germany



Asymmetric Mukaiyama-Mannich reaction with aldimine **13** and ketene silyl acetal **14** at r.t and 25% catalyst loading.

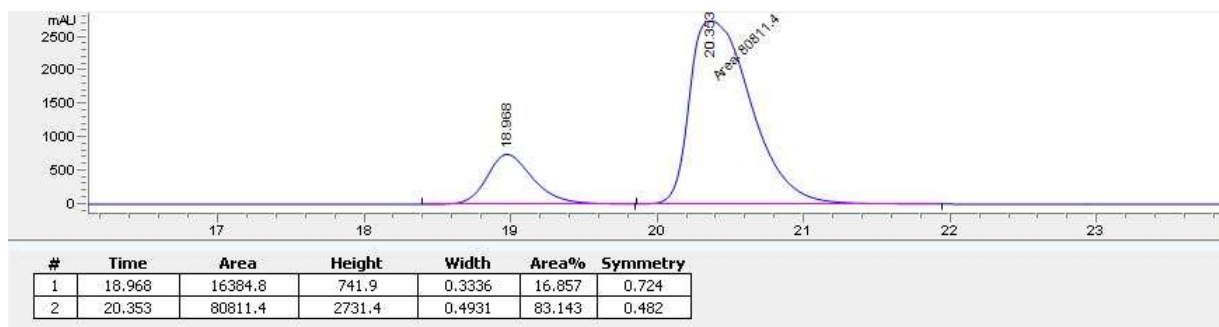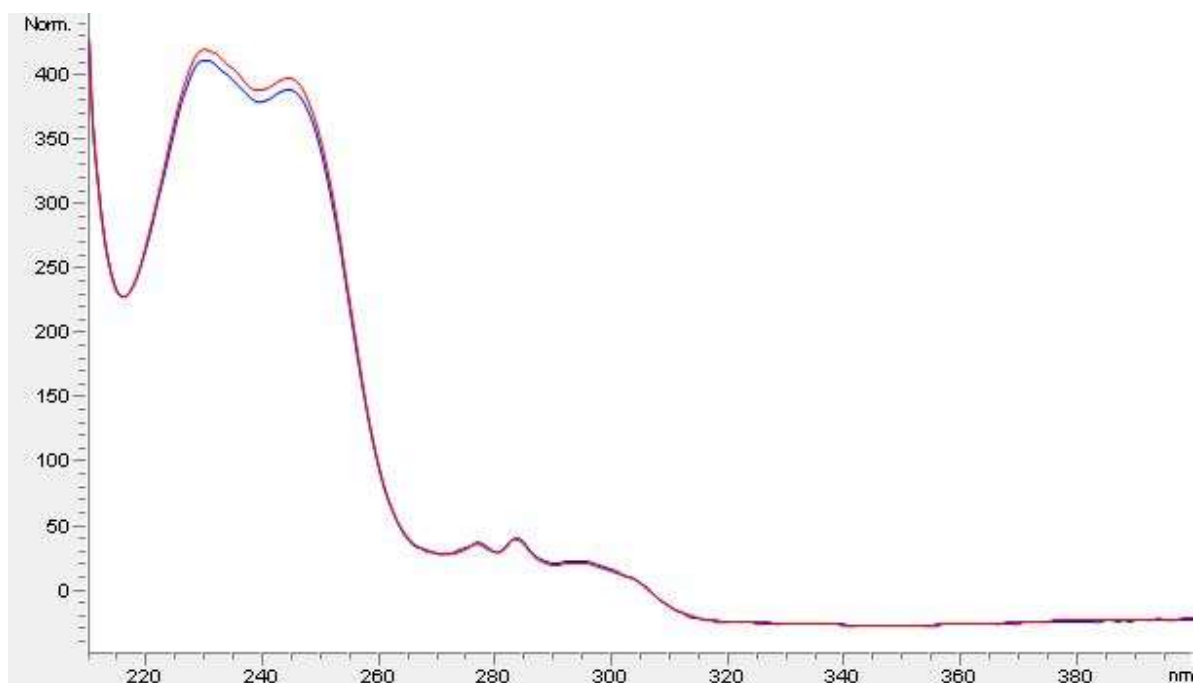

<sup>a</sup> Institut für Organische Chemie, Universität Regensburg, D-93053 Regensburg, Germany. E-mail: ruth.gschwind@chemie.uni-regensburg.de

<sup>b</sup> Institute of Physical and Theoretical Chemistry, University of Regensburg, D-93053, Germany

Asymmetric Mukaiyama-Mannich reaction with aldimine **13** and ketene silyl acetal **14** at -10 °C and 10% catalyst loading.

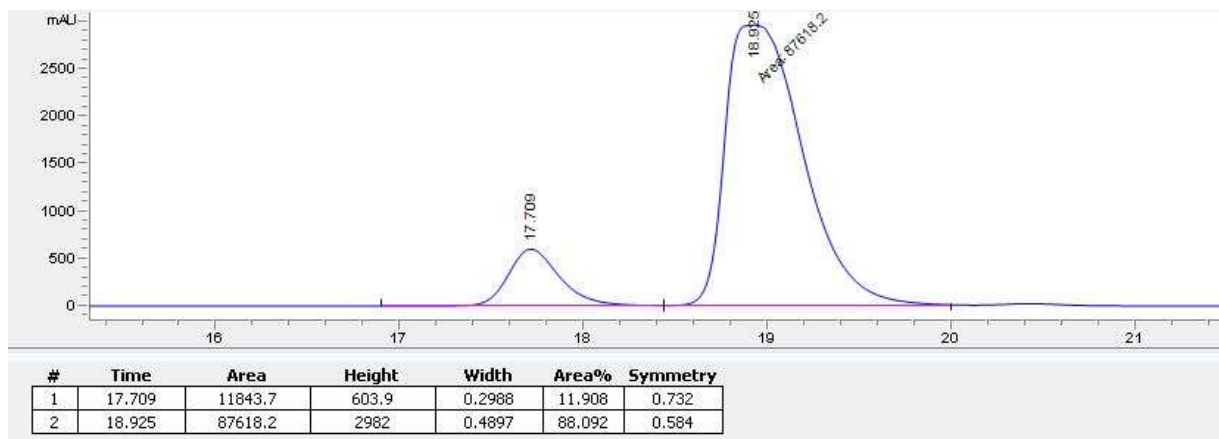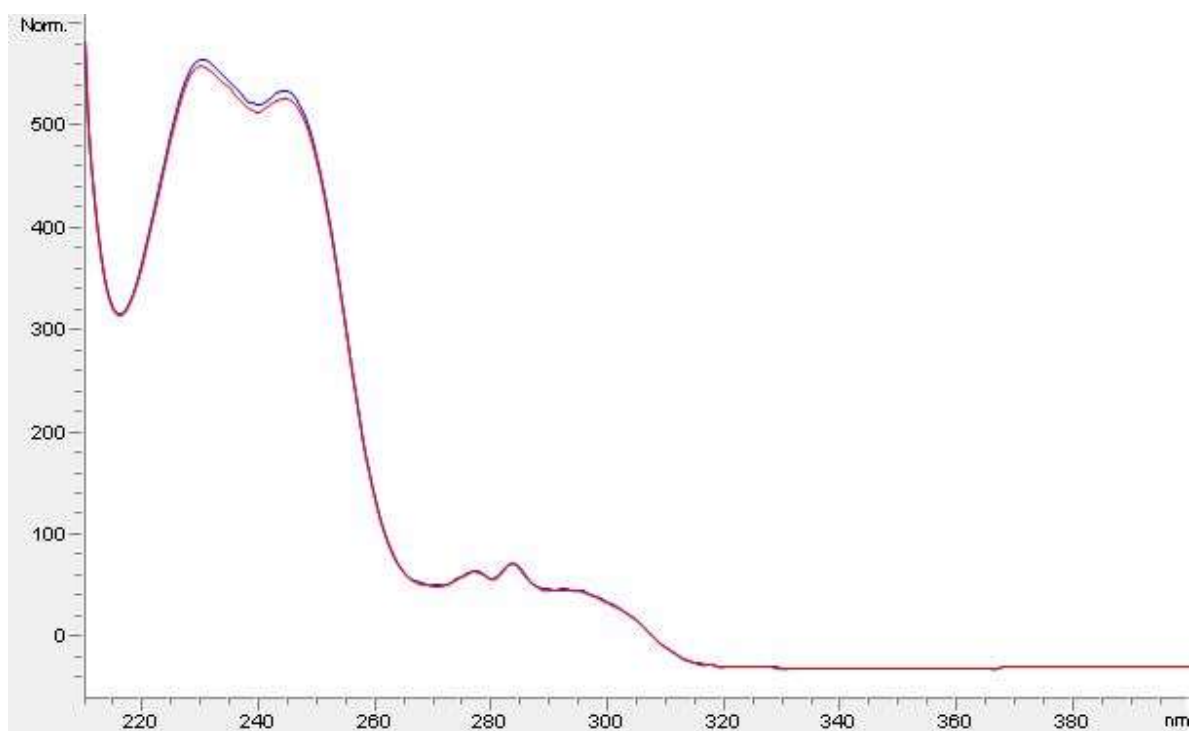

<sup>a</sup> Institut für Organische Chemie, Universität Regensburg, D-93053 Regensburg, Germany. E-mail: ruth.gschwind@chemie.uni-regensburg.de

<sup>b</sup> Institute of Physical and Theoretical Chemistry, University of Regensburg, D-93053, Germany

Asymmetric Mukaiyama-Mannich reaction with aldimine **13** and ketene silyl acetal **14** at -10 °C and 25% catalyst loading.

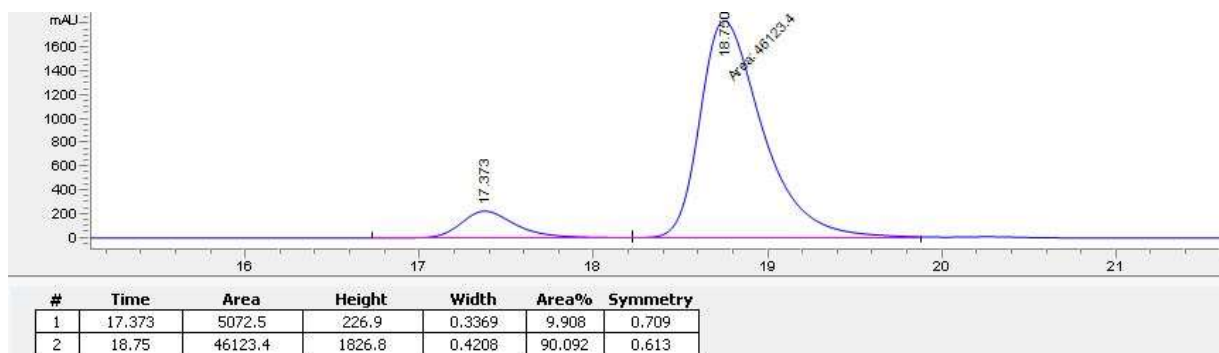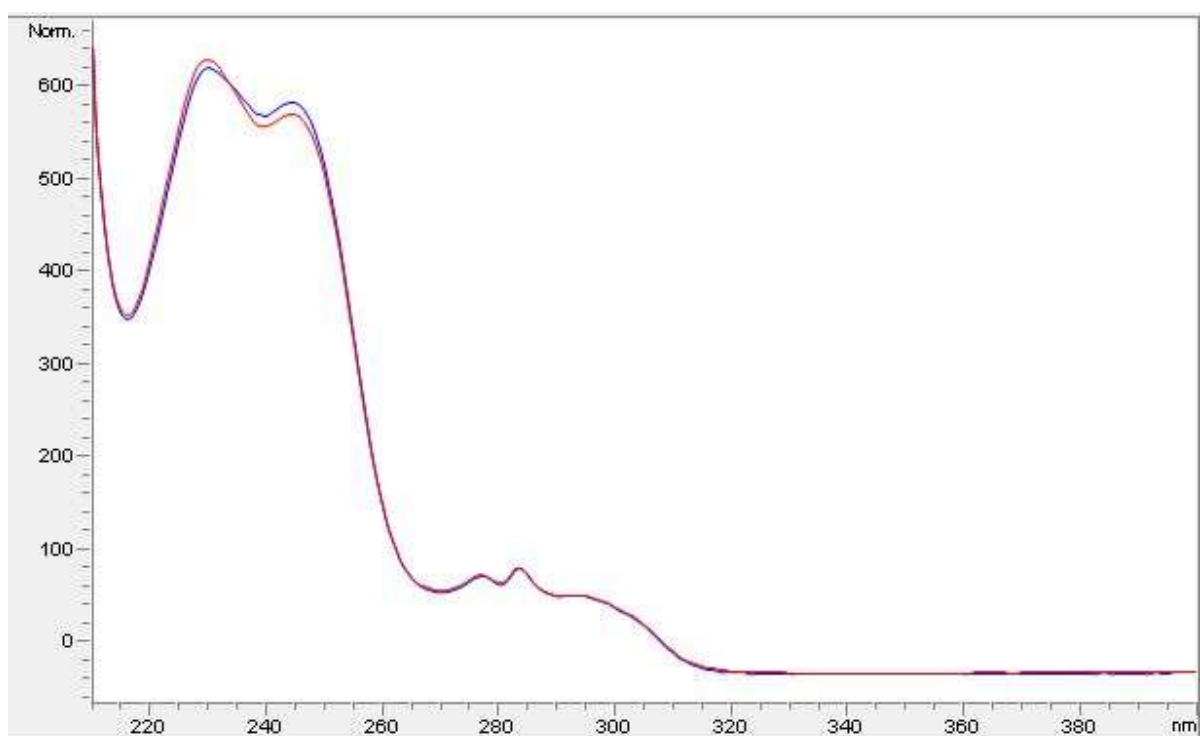

<sup>a</sup> Institut für Organische Chemie, Universität Regensburg, D-93053 Regensburg, Germany. E-mail: ruth.gschwind@chemie.uni-regensburg.de

<sup>b</sup> Institute of Physical and Theoretical Chemistry, University of Regensburg, D-93053, Germany

Asymmetric Mukaiyama-Mannich reaction with aldimine **13** and ketene silyl acetal **14** at 80 °C and 1% catalyst loading.

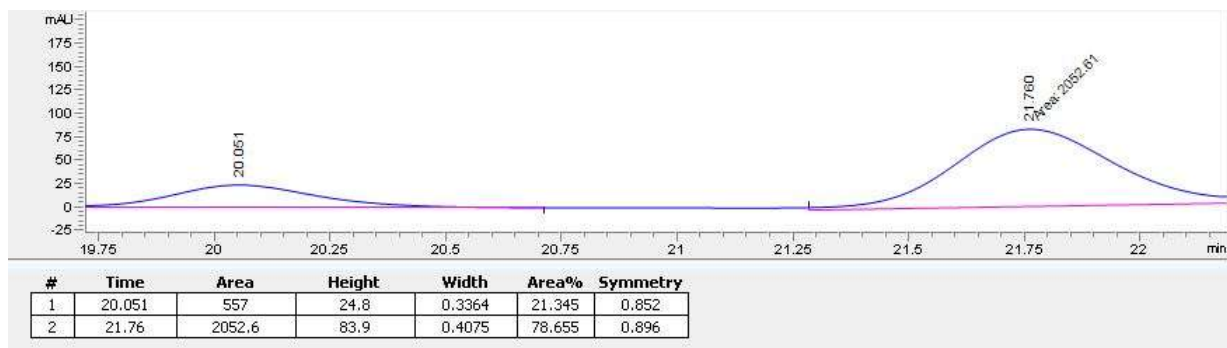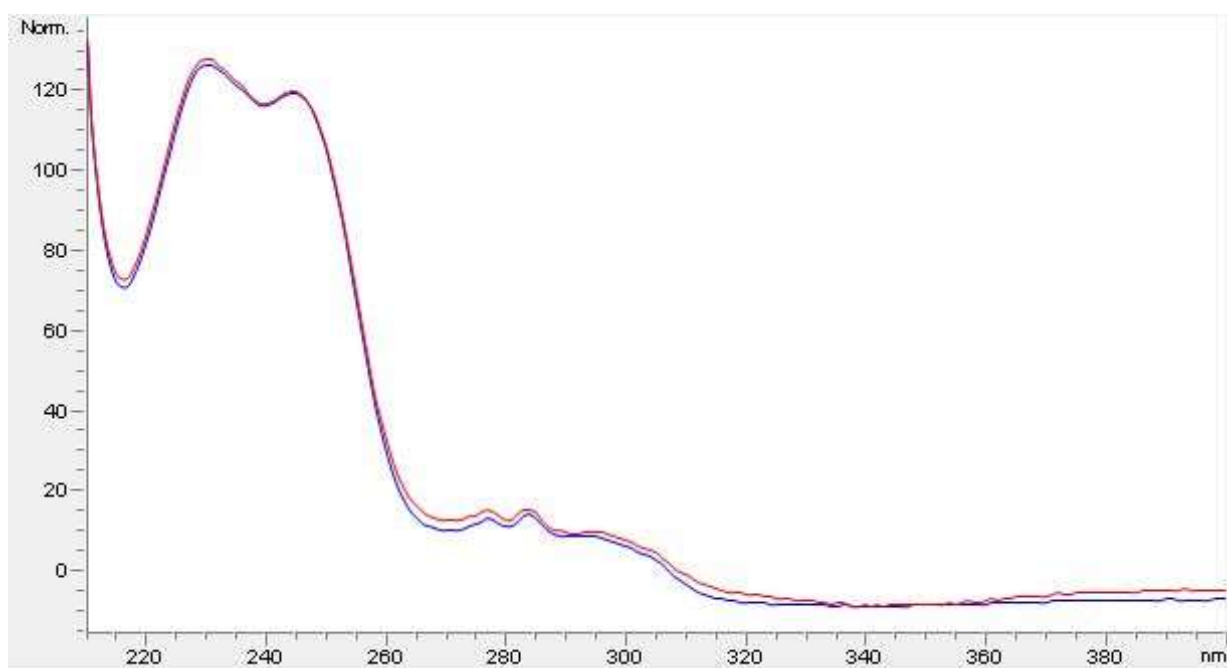

Asymmetric Mukaiyama-Mannich reaction with aldimine **13** and ketene silyl acetal **14** at 80 °C and 10% catalyst loading.

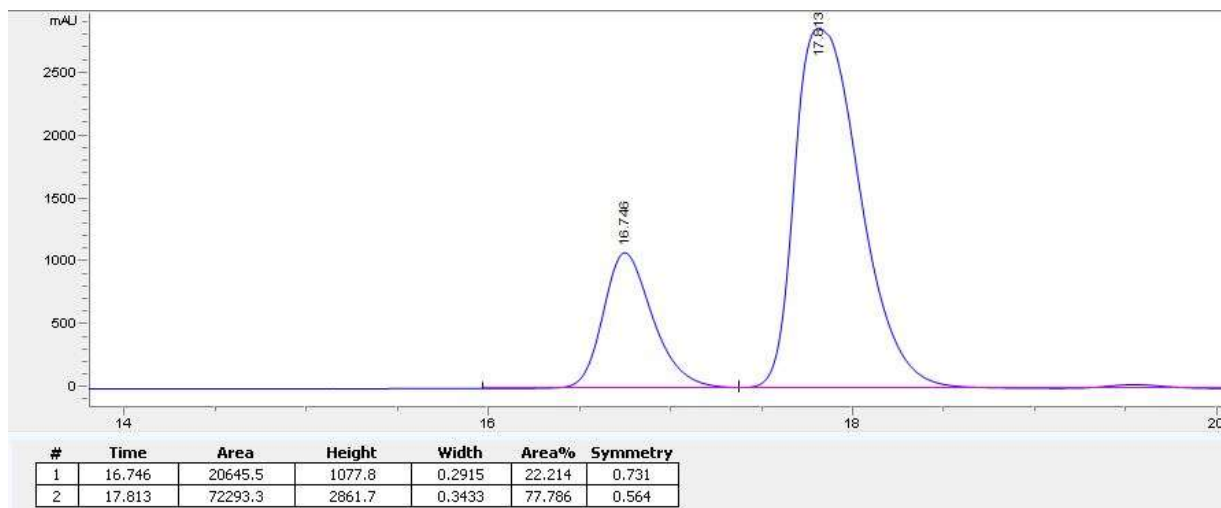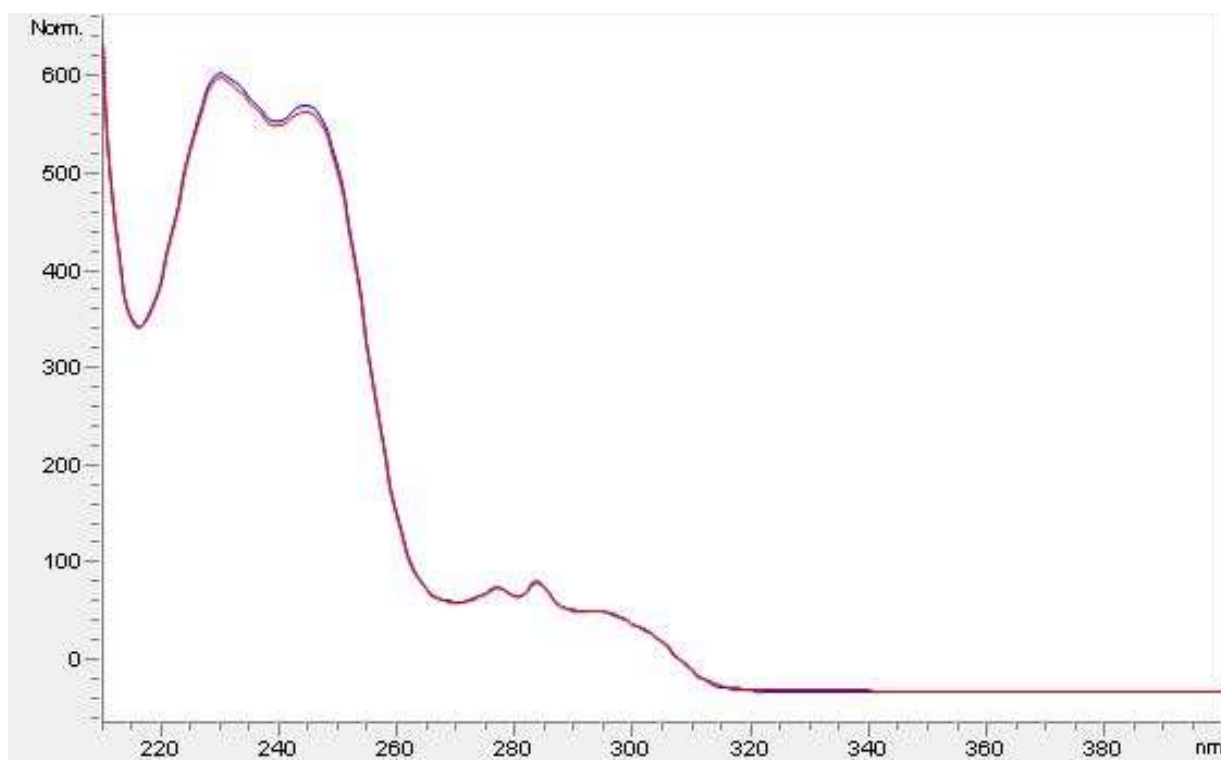

Asymmetric Mukaiyama-Mannich reaction with aldimine **13** and ketene silyl acetal **14** at -80 °C and 25% catalyst loading.

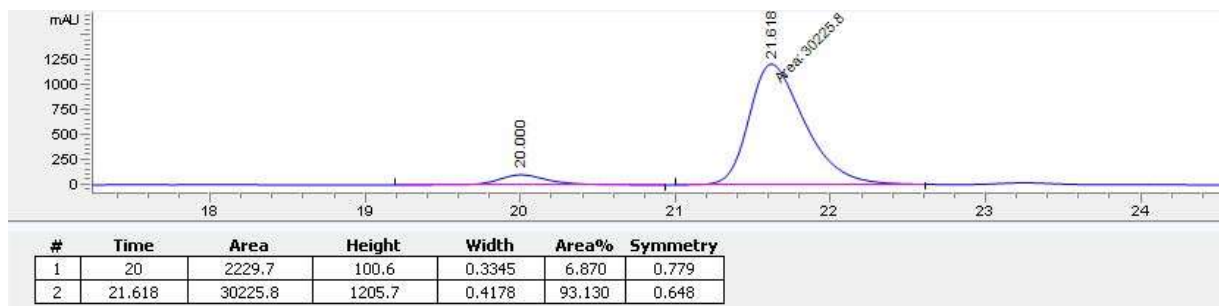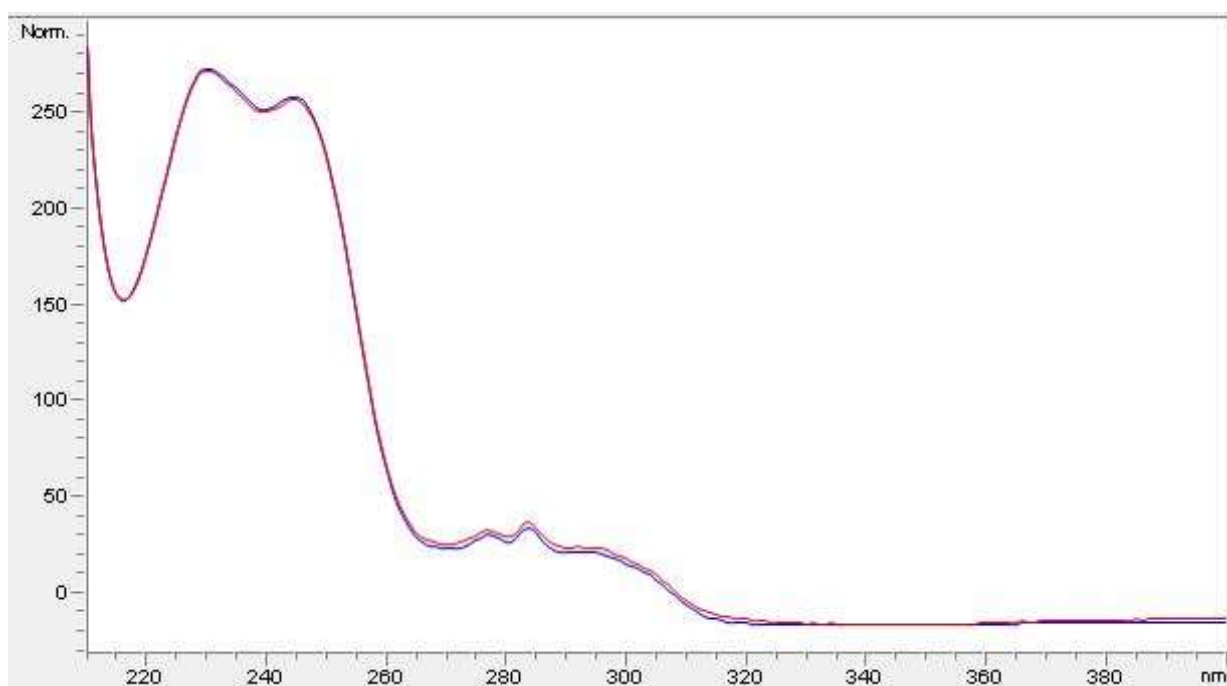

<sup>a</sup> Institut für Organische Chemie, Universität Regensburg, D-93053 Regensburg, Germany. E-mail: ruth.gschwind@chemie.uni-regensburg.de

<sup>b</sup> Institute of Physical and Theoretical Chemistry, University of Regensburg, D-93053, Germany

## Molecular dynamics (MD) simulations

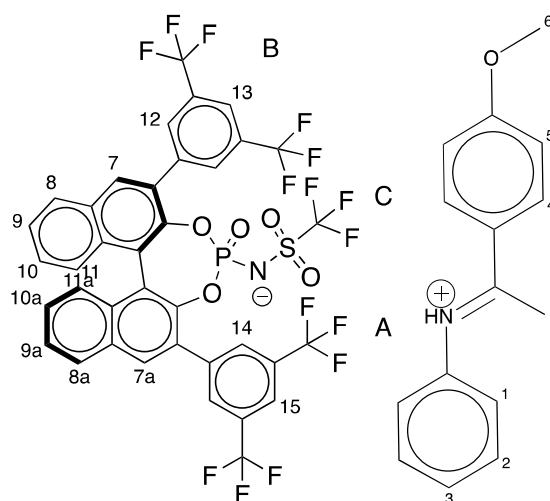

*Figure S25: Model system, with numbered for comparison with the subsequent distance distributions*

The model system consists of (2,6-bis(3,5-bis(trifluoromethyl)phenyl)-4-oxidodinaaphtho [2,1-d:1',2'-f][1,3,2]dioxaphosphepin-4-yl) ((trifluoromethyl)sulfonyl)amide and the molecule (E)-N-(1-(4-methoxyphenyl)-ethylidene)benzenaminium (see Figure S25).

The corresponding NMR-spectrum is given in Figure S26. Here it is not immediately clear how the underlying conformer species are constituted. MD-simulations were employed to suggest possible structures based on NOE-contacts. (see Figure S28)

<sup>a</sup> Institut für Organische Chemie, Universität Regensburg, D-93053 Regensburg, Germany. E-mail: ruth.gschwind@chemie.uni-regensburg.de

<sup>b</sup> Institute of Physical and Theoretical Chemistry, University of Regensburg, D-93053, Germany

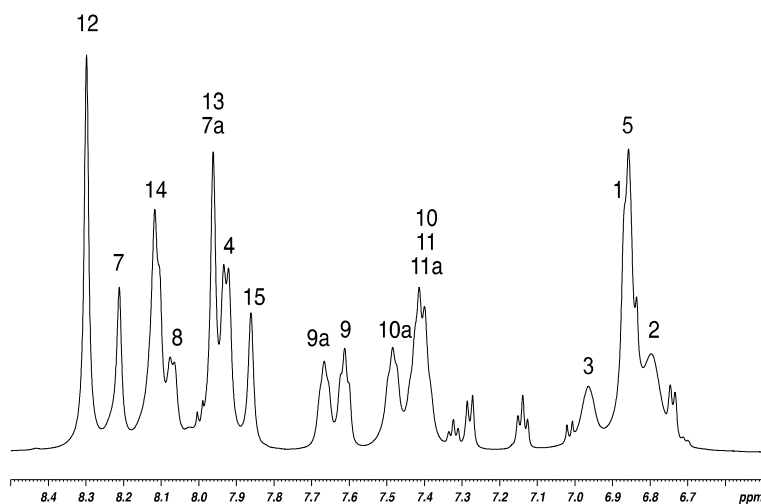

Figure S26:  $^1\text{H}$  NMR-spectrum of the model complex between and *E*-imine measured at 180 K and 600 MHz. Assignment by M. Hecht.

For brevity's sake those molecules in Figure S25 will be referred to as “NTPA” and “iminium” respectively.

For the MD-investigation only the *E*-imine was simulated, because this one led to clear NOE-signals. Furthermore, the strong acidity of the NTPA led to the description as a purely ionic system, as a  $\text{NTPA}^-$  and  $\text{iminium}^+$  species.

Accordingly, only simulations of the ionic species were done.

## Methods

### Force Field parameters

Using ORCA<sup>23</sup> version 5.0.2 geometry optimizations of the individual ions were obtained at B3LYP def2-TZVP level using the conductor-like polarizable continuum Model<sup>24</sup> (CPCM) for  $\text{CH}_2\text{Cl}_2$  and the D3BJ correction. The same parameters were used for optimization of the combined complex. Mayer bond orders were used as a check for validity.

<sup>a</sup> Institut für Organische Chemie, Universität Regensburg, D-93053 Regensburg, Germany. E-mail: ruth.gschwind@chemie.uni-regensburg.de

<sup>b</sup> Institute of Physical and Theoretical Chemistry, University of Regensburg, D-93053, Germany



For the structure “tight” optimization was chosen, as well as a change in the grid to “defgrid3”. Frequencies were obtained numerically. RESP charges were obtained with Multiwfn 3.7<sup>25</sup>. Antechamber<sup>26</sup> was used for assigning GAFF<sup>27</sup> parameters. The imine the parameters “ce” and “na” were used as an approximation within the GAFF context for the iminium nitrogen and the neighboring carbon atom.

Similarly, the N<sup>-</sup> of the NTPA-anion was approximated as an “ne” type, an inner sp<sup>2</sup> N in conjugated chain systems with 2 substituents.

Dichloromethane was described by a GAFF based force field, by Horinek<sup>28</sup>, which was modified, so it used virtual sites.

Acpype<sup>29</sup> was used for conversion of the topology file formats. The force fields are given below.

---

<sup>a</sup> Institut für Organische Chemie, Universität Regensburg, D-93053 Regensburg, Germany. E-mail: ruth.gschwind@chemie.uni-regensburg.de

<sup>b</sup> Institute of Physical and Theoretical Chemistry, University of Regensburg, D-93053, Germany

### *Simulation Details for comparison of distances with NOE data*

The GROMACS<sup>30</sup> simulation package was used for all MD-simulations in versions of 2018 and newer.

Simulations of the E-imine were carried out within a box containing 1 iminium, 605 DCM and 1 NTPA molecule with a timestep of 2 fs for a total simulation time of 1.6  $\mu$ s at 1 bar and 180 K.

For this the Parrinello-Rahman barostat (compressibility=  $2.5 \times 10^{-5}$  bar<sup>-1</sup>,  $\tau_p=1$  ps) and the v-rescale thermostat ( $\tau_T=1$  ps). For the data evaluation a relatively long equilibration period of 50 ns was excluded. This time corresponds to the initial formation of the complex.

At 180K no interconversion of I and II occurs. Complete ergodicity cannot be assumed.

Simulations at higher temperatures (300K and more) were also tested, to see whether new preferential structures occur or exchange between motifs I and II occur on the simulation time scale. As there were no significant changes, the simulations at 180K will be evaluated in the discussion. The usual corrections for energy and pressure were employed during the simulations.

### *Simulation Details for the determination of free energy differences along the H-bond donor and acceptor H-coordinate*

For the comparison between the H-bond possibilities towards the NTPA phosphate centered oxygen and nitrogen, umbrella sampling was performed with the parameters from above, starting from the oxygen bound situation (see Figure S65, Figure S66) at a umbrella distance of around 0.37 nm.

Umbrella windows were centered at distances of 0.42, 0.37, 0.32, 0.27, 0.22, 0.17, 0.12 and 0.08 nm between the E-iminium H and the NTPA's nitrogen atom with a force constant of  $k=1000$  kJ mol<sup>-1</sup> nm<sup>-2</sup>. For every subsequent umbrella simulation the end point of the previous ones was taken. The data was written to the file every 500 steps. Two different

---

<sup>a</sup> Institut für Organische Chemie, Universität Regensburg, D-93053 Regensburg, Germany. E-mail: ruth.gschwind@chemie.uni-regensburg.de

<sup>b</sup> Institute of Physical and Theoretical Chemistry, University of Regensburg, D-93053, Germany

PMFs were obtained with *gmx wham*.<sup>31</sup> Once for simulations that were run at 300K for 1000000000 steps (2 $\mu$ s), which also showed significant rotations of the iminium in the binding pocket along the umbrella steps. Subtrajectories yielded similar PMFs, which means quasi-ergodic sampling can be assumed (*Figure S68*).

Another short set (20 ns) of simulations at 180K, which do not show significant conformational changes (see *Figure S69*) along the umbrella coordinate, was also used to obtain PMFs as an estimate for moving the iminium molecule towards the nitrogen without rotations. Because of the qualitative similarity of the 180K and 300K PMFs the 300K simulations are assumed to be sufficiently sampled.

### **Mayer Bond Orders: An Initial Check for Validity**

As the N<sup>-</sup> atom is not a standardized atom in the GAFF context a quick check for validity of using the “ne” parameter was employed. This is by no means a comprehensive analysis. Instead serves as a plausibility argument: if the bond orders did not reflect the force field description, another model would be needed.

It is usually assumed that a negatively charged NTPA molecule has its charge centered fully on the nitrogen, which means that the bond towards its neighboring P and S atoms should be described as a single bond. The Mayer bond orders (from ORCA) obtained for the geometry optimization of the anion is shown in fig. Figure S27 (rounded to the second decimal point). The Mulliken gross atomic charge for the double bond oxygen atom is -0.5934 and for the formally negative nitrogen -0.4539.

The charges from the RESP fit are -0.6925900998/-0.7664559612 for O and N respectively using the default settings and -0.6978260556/-0.7417259377 after adding equivalencies for the fluoride atoms. The main charge seems nitrogen centered. Thus, an H-bond through oxygen is probably not caused simply by a higher charge on the oxygen compared to the nitrogen position.

---

<sup>a</sup> Institut für Organische Chemie, Universität Regensburg, D-93053 Regensburg, Germany. E-mail: ruth.gschwind@chemie.uni-regensburg.de

<sup>b</sup> Institute of Physical and Theoretical Chemistry, University of Regensburg, D-93053, Germany

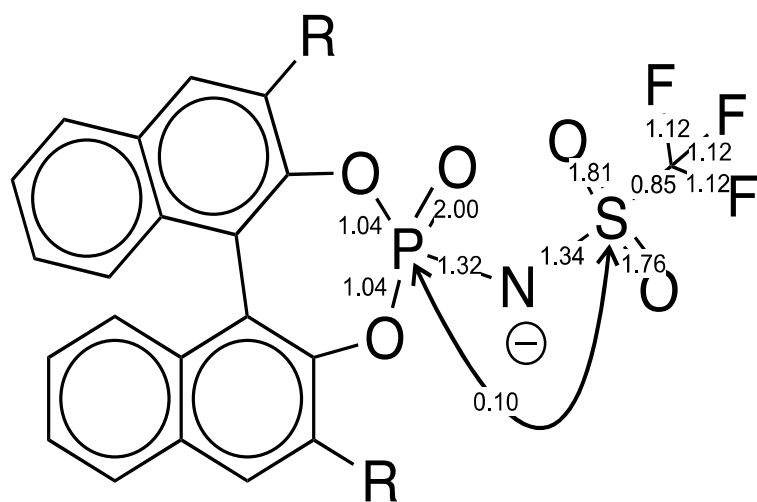

Figure S27: Mayer bond order between atoms of interest (rounded) for the NTPA anion (full data given in the DFT section)

<sup>a</sup> Institut für Organische Chemie, Universität Regensburg, D-93053 Regensburg, Germany. E-mail: ruth.gschwind@chemie.uni-regensburg.de

<sup>b</sup> Institute of Physical and Theoretical Chemistry, University of Regensburg, D-93053, Germany

## Comparison of Weighted Distances with NOE-Contacts

From the NMR-experiments the following NOE-contacts are known:

*Table S2: NOE contacts between H positions on the iminium molecule and the molecule; "/" denotes a logical "or". For these the signals could not be assigned completely by due to overlap.*

| iminium | NTPA       |
|---------|------------|
| 2       | 8a         |
| 3       | 8a         |
| 2       | 9a         |
| 3       | 9a         |
| 1/5     | 10a/11/11a |
| 2       | 10a/11/11a |
| 3       | 10a/11/11a |

*Table S3: HOE contacts; "/" denotes a logical "or"*

| iminium | NTPA     |
|---------|----------|
| 1/5     | C        |
| A + B   | 6 and Me |
| A + B   | 1/5      |

<sup>a</sup> Institut für Organische Chemie, Universität Regensburg, D-93053 Regensburg, Germany. E-mail: ruth.gschwind@chemie.uni-regensburg.de

<sup>b</sup> Institute of Physical and Theoretical Chemistry, University of Regensburg, D-93053, Germany

### *Evaluated Distances Related to the NOE-Contacts Allow for a Differentiation between Structure Motifs*

Two distinct structure motifs have emerged from the simulations: they differ mainly by the rotation of the iminium by 180 ° (see Figure S28).

They will be referred to as motifs **I** and **II** in the following section.

It will be shown that **II** most probably does not correspond to the observed NOE-contacts in Table S2. Additionally, it will be shown that motif **I** contains contributions of two main conformers.

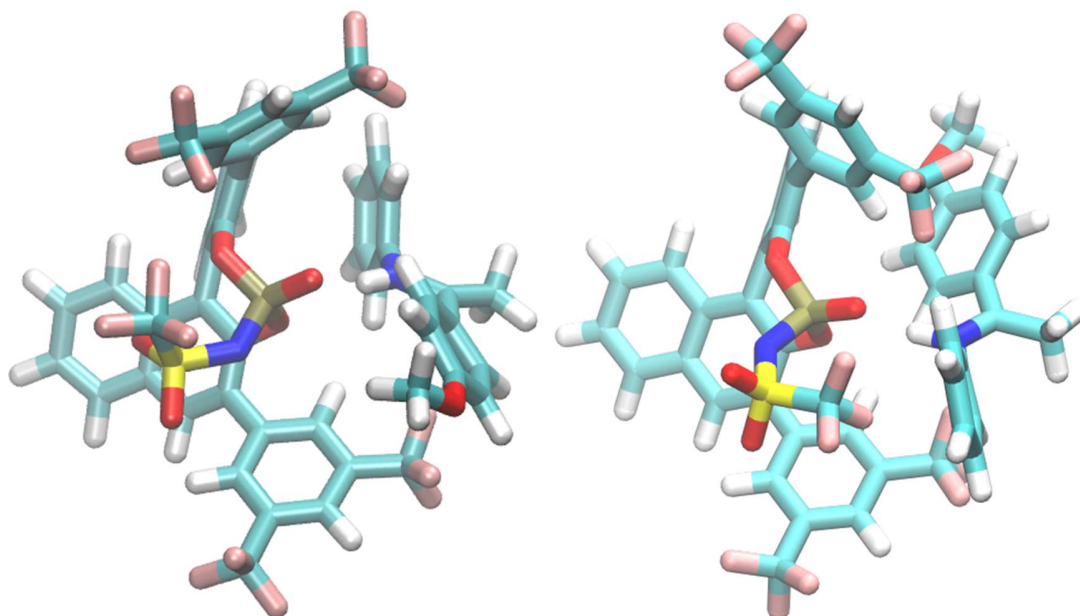

*Figure S28: Structure motif I (left) and II (right) differ by the rotation of the iminium molecule in the binding pocket*

As one can surmise from the NOE contacts (compare Figure S28 to Table S2) between the iminium positions **2** and **3** to the positions **8a**, **9a**, **10a** and possibly **11a**, the iminium-phenyl ring might be positioned on top of the NTPA-backbone.

We will discuss both sides of the NTPA-backbone separately. Due to the necessary number of distance distributions related to this discussion the results are presented first, and the distance distributions are shown afterwards. This is done for BINOL-sides separately.

<sup>a</sup> Institut für Organische Chemie, Universität Regensburg, D-93053 Regensburg, Germany. E-mail: ruth.gschwind@chemie.uni-regensburg.de

<sup>b</sup> Institute of Physical and Theoretical Chemistry, University of Regensburg, D-93053, Germany



### *Distances Towards Atoms Situated on the “a” BINOL Side*

First the BINOL-side denoted as “a” in Figure S25 will be discussed.

Due to the NOE-contacts small distances would have been expected between the iminium positions **2** and **3** towards positions **8a** and **9a** on the molecule. This is not the case for either motif **I** or **II** (in Figure S28) as the distances observed in the simulations are larger than 0.6 nm. NOE contacts can usually be found below this value (compare Figures S30, S31, S33, S34).

It is also not the case for the contacts assigned towards position **10a** from the imine positions **1**, **2** and **3** (compare Figures S35, S36, S37).

A possible contact from **11a** towards **1**, **2** and **3** seems possible only for structure motif **I**.

This lets us exclude the positioning of both motif **I** and **II** on the BINOL “a” side. In addition, it may be possible that just the nomenclature used for the BINOL “a” side and the “non-a” side needs to be reversed to be compatible with the NMR data.

### *Distances Towards Atoms Situated on the “non-a” BINOL Side*

The difference between structure motif **I** and **II** regarding the distances from the other side of the BINOL-backbone not denoted as “a” becomes prominent.

**I** shows close distances between positions **2** or **3** on the iminium towards **8**, **9** or **10** of the of around and below 0.5 nm, whereas **II** does not. These distances likely correspond to possible NOE-contacts (see Figures S42, S43, S45, S46, S48, S49).

This allows for a similar exclusion of structure motif **II** for the other -side and promotes **I** to a strong candidate for the experimentally measured structure – provided the HOE contacts correspond to reasonable distances. *Figure S53 ff* below confirm this. Still, it is not possible to differentiate whether **A** and **B** are in contact with atoms **1** or **5**. This means the initial arbitrary assignment of which side was denoted with “a” needs to be reversed. Motif **I** may well correspond to the NMR-results, whereas **II** can be excluded.

---

<sup>a</sup> Institut für Organische Chemie, Universität Regensburg, D-93053 Regensburg, Germany. E-mail: ruth.gschwind@chemie.uni-regensburg.de

<sup>b</sup> Institute of Physical and Theoretical Chemistry, University of Regensburg, D-93053, Germany



*Distance Distributions related to the NOE-Contacts of the "a" BINOL Side*

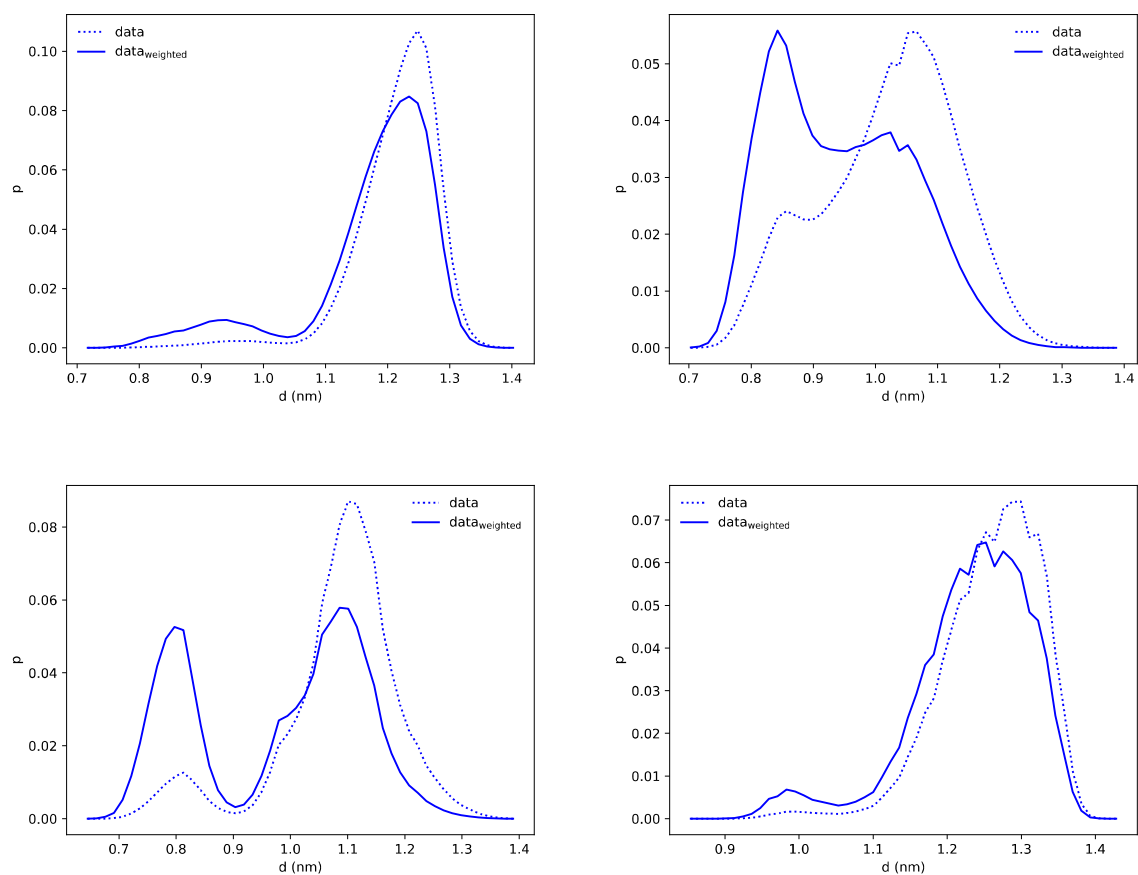

*Figure S29:  $r^{-6}$  weighted and unweighted distance distributions between 1 and 8a. As there are two possible hydrogen atoms corresponding to position 1, both are shown. Distances for structure motif I are shown on the top and for II on the bottom.*

<sup>a</sup> Institut für Organische Chemie, Universität Regensburg, D-93053 Regensburg, Germany. E-mail: ruth.gschwind@chemie.uni-regensburg.de

<sup>b</sup> Institute of Physical and Theoretical Chemistry, University of Regensburg, D-93053, Germany

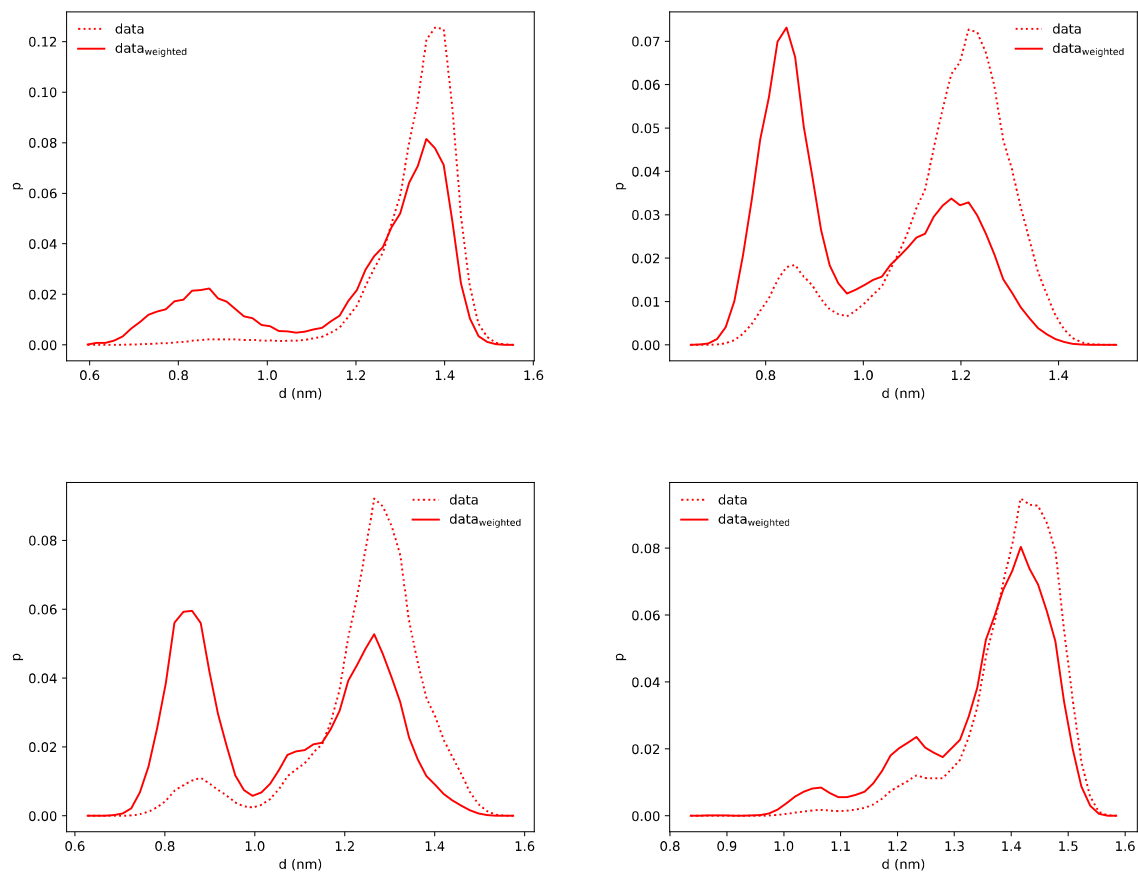

Figure S30:  $r^{-6}$  weighted and unweighted distance distributions between 2 and 8a. As there are two possible hydrogen atoms corresponding to position 2, both are shown. Distances for structure motif I are shown on the top and for II on the bottom.

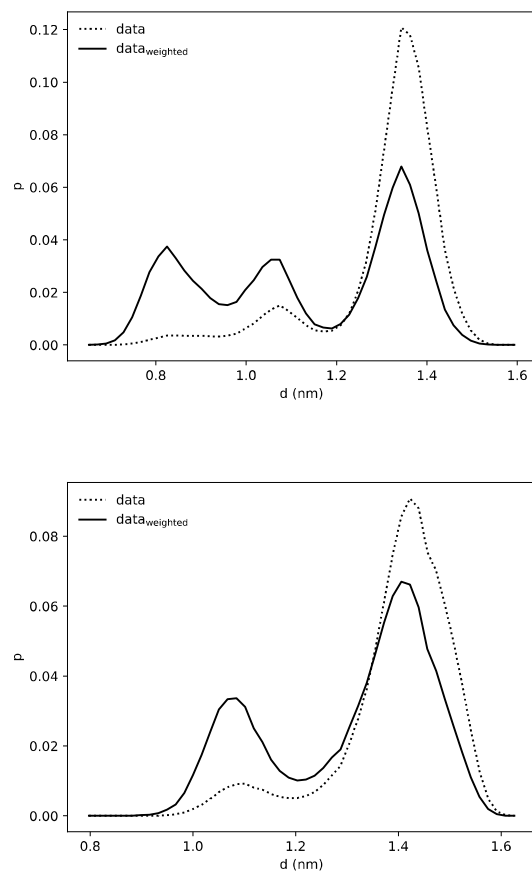

Figure S31:  $r^{-6}$  weighted and unweighted distance distributions between 3 and 8a. Distances for structure motif I are shown on the top and for II on the bottom.

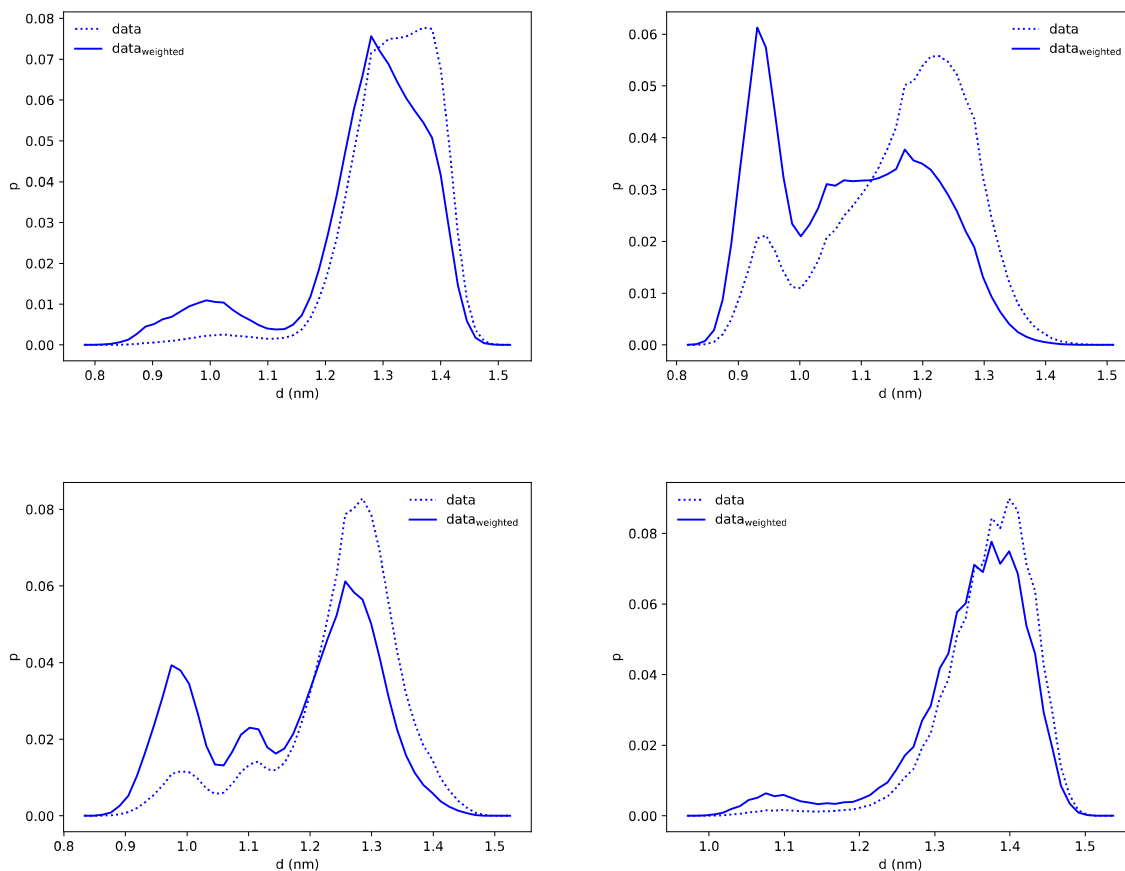

Figure S32:  $r^{-6}$  weighted and unweighted distance distributions between 1 and 9a. As there are two possible hydrogen atoms corresponding to position 1, both are shown. Distances for structure motif I are shown on the top and for II on the bottom.

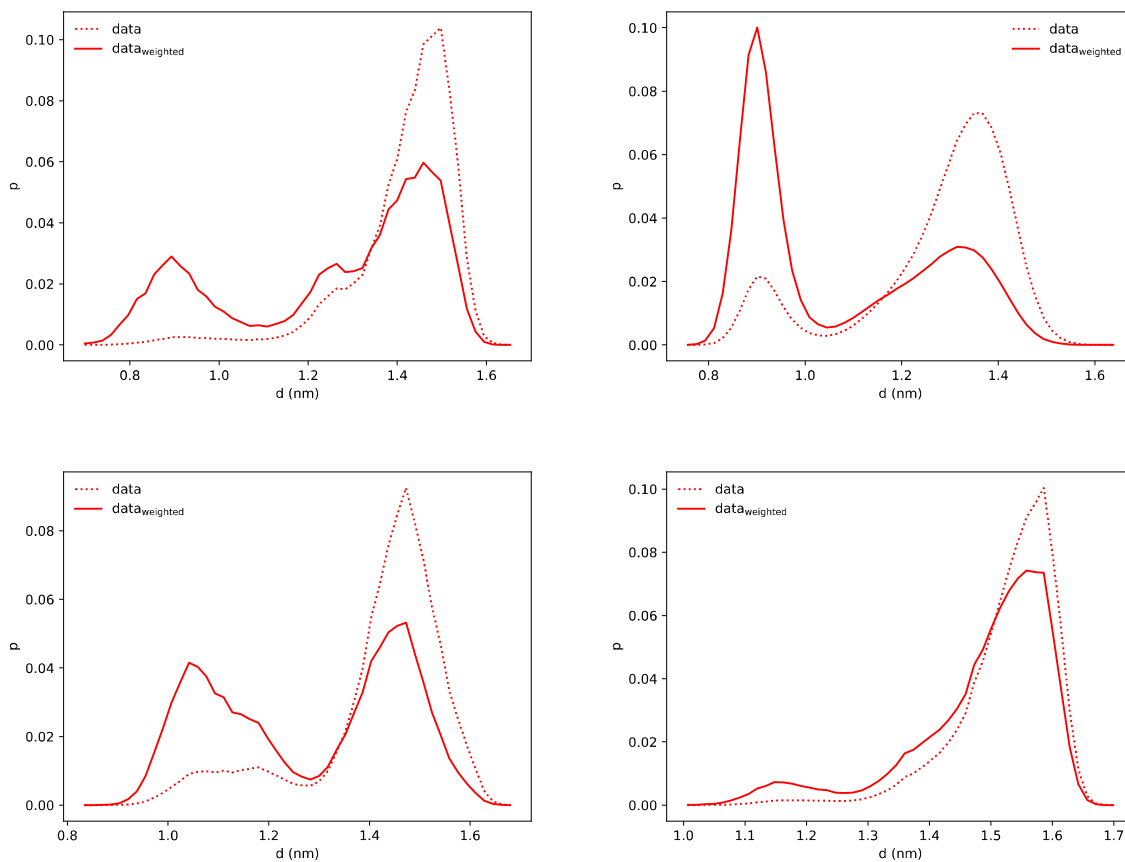

Figure S33:  $r^{-6}$  weighted and unweighted distance distributions between 2 and 9a. As there are two possible hydrogen atoms corresponding to position 2, both are shown. Distances for structure motif I are shown on the top and for II on the bottom.

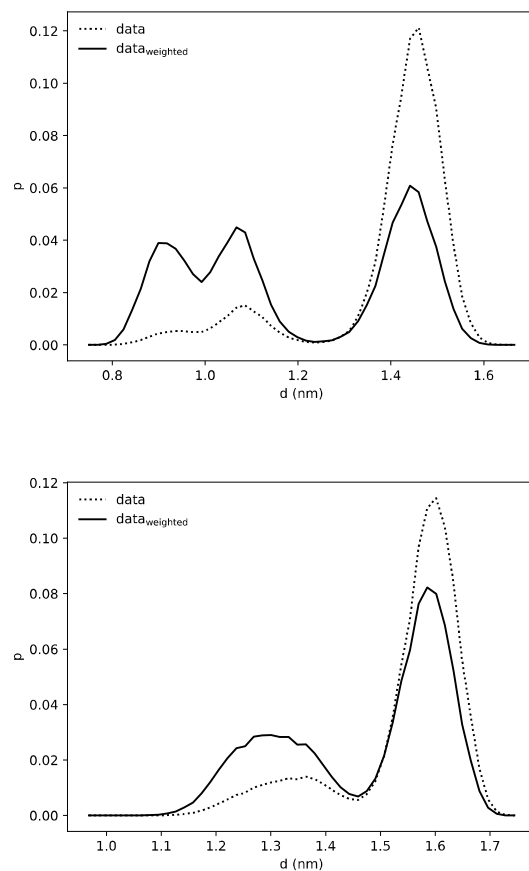

Figure S34:  $r^{-6}$  weighted and unweighted distance distributions between 3 and 9a. Distances for structure motif I are shown on the top and for II on the bottom.

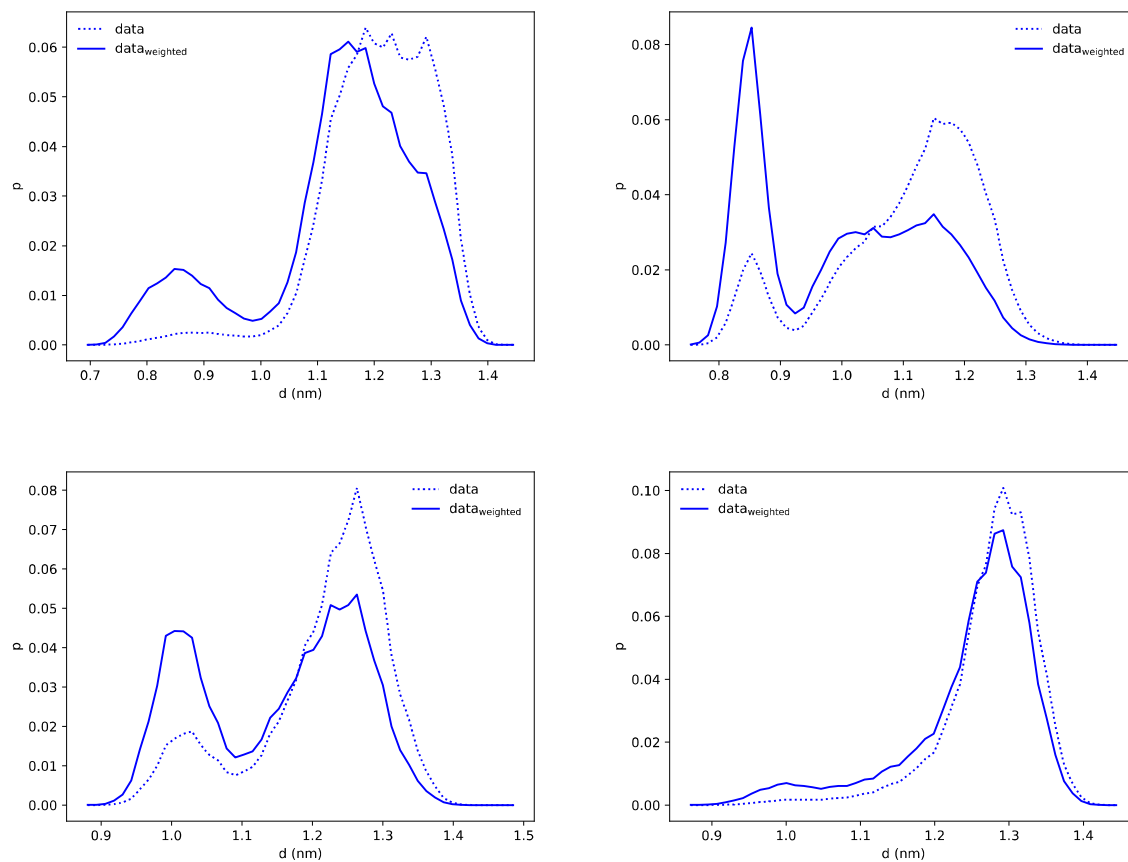

Figure S35:  $r^{-6}$  weighted and unweighted distance distributions between 1 and 10a. As there are two possible hydrogen atoms corresponding to position 1, both are shown. Distances for structure motif I are shown on the top and for II on the bottom.

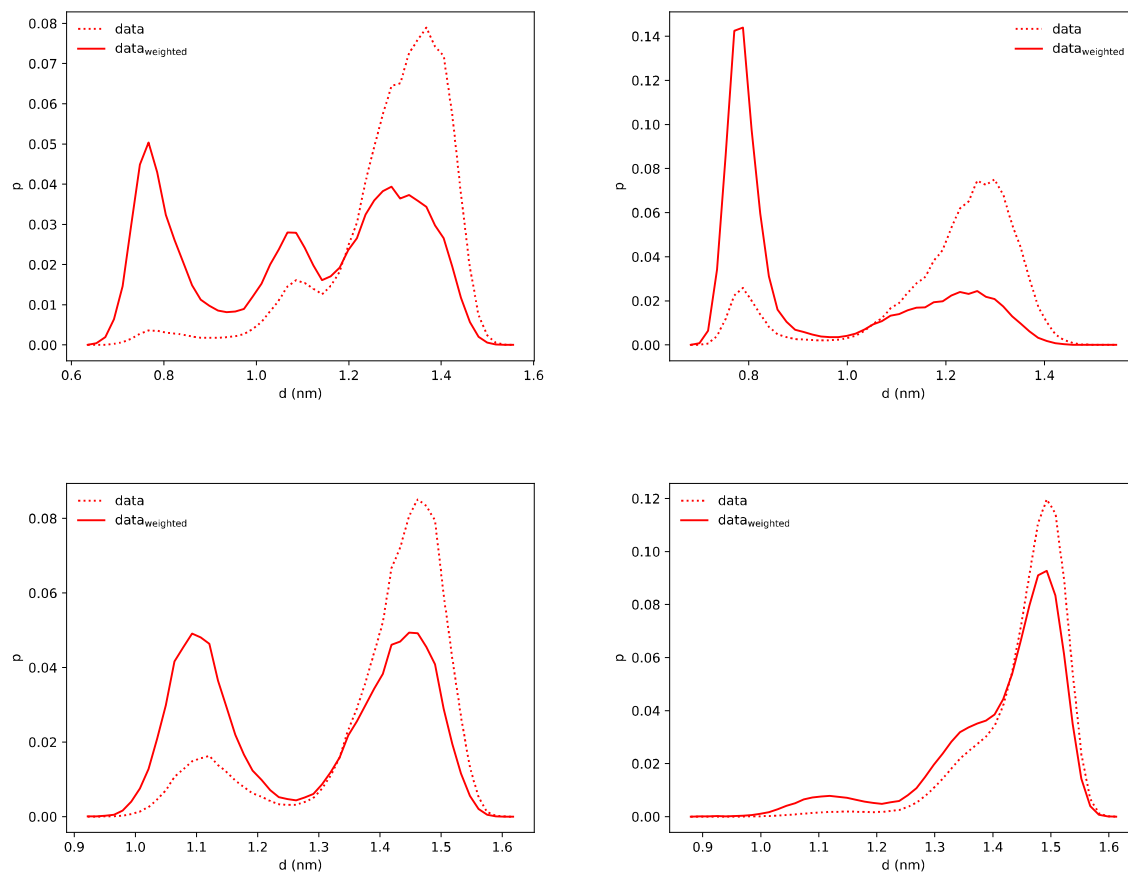

Figure S36:  $r^{-6}$  weighted and unweighted distance distributions between 2 and 10a. As there are two possible hydrogen atoms corresponding to position 2, both are shown. Distances for structure motif I are shown on the top and for II on the bottom.



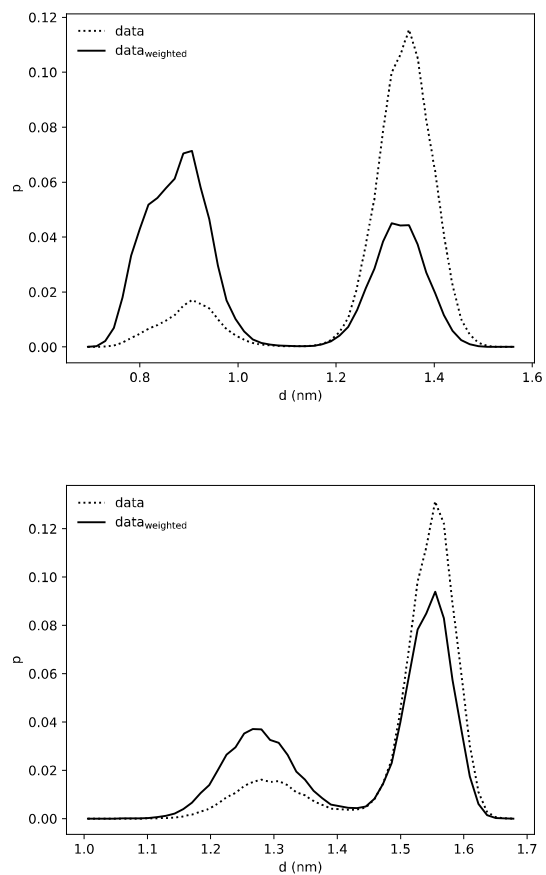

Figure S37:  $r^{-6}$  weighted and unweighted distance distributions between 3 and 10a. Distances for structure motif I are shown on the top and for II on the bottom.

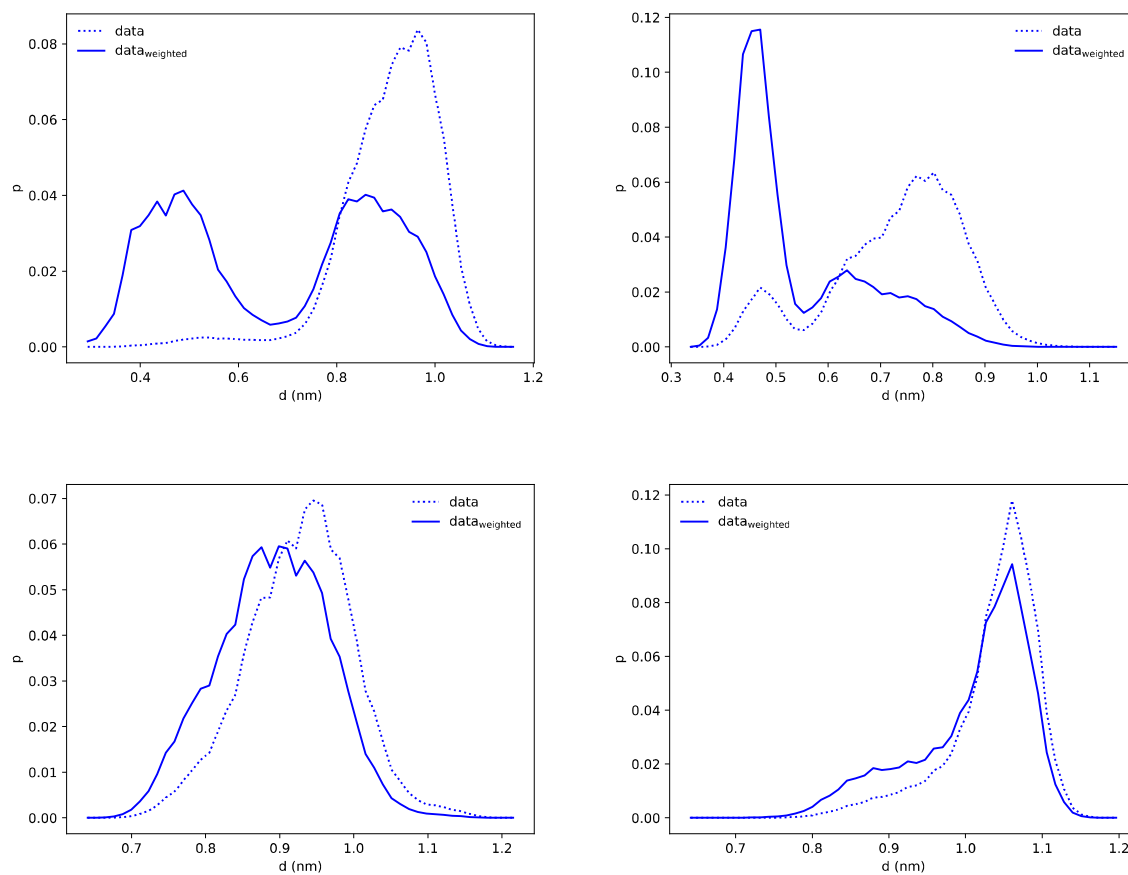

Figure S38:  $r^{-6}$  weighted and unweighted distance distributions between 1 and 11a. As there are two possible hydrogen atoms corresponding to position 1, both are shown. Distances for structure motif I are shown on the top and for II on the bottom.

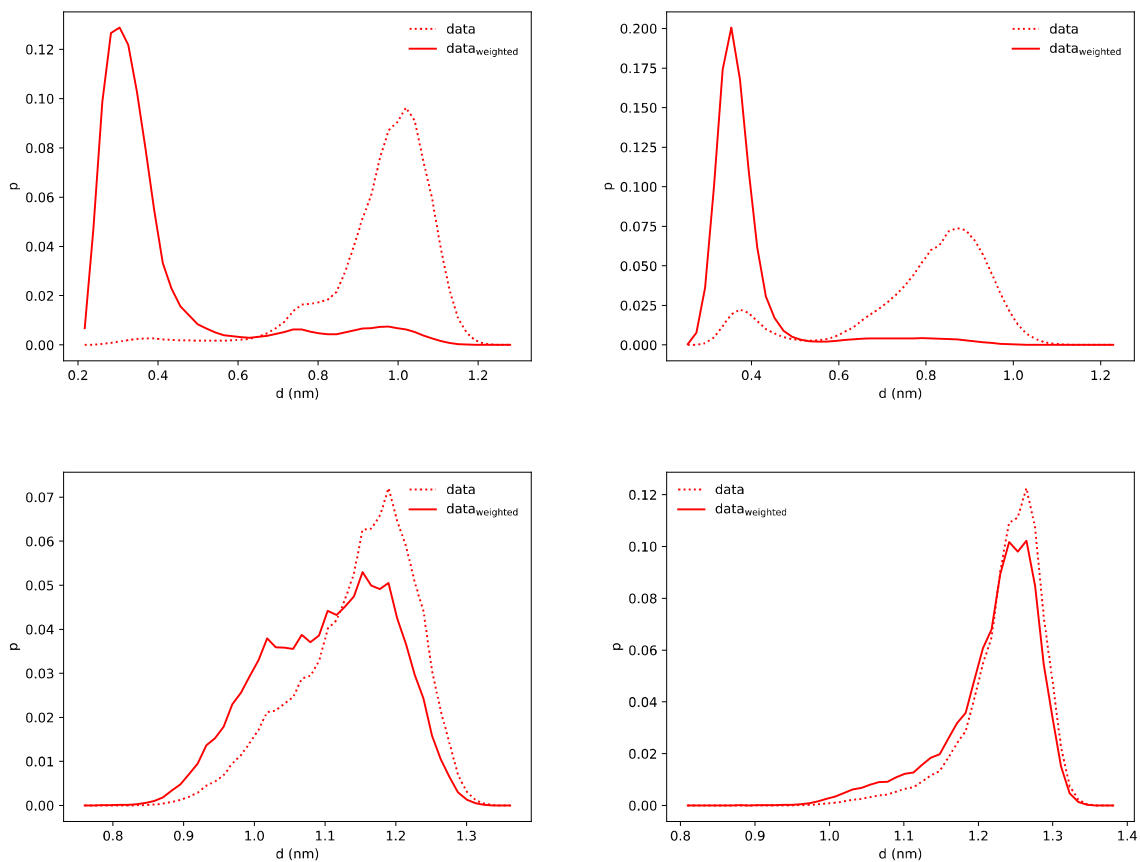

Figure S39:  $r^{-6}$  weighted and unweighted distance distributions between 2 and 11a. As there are two possible hydrogen atoms corresponding to position 2, both are shown. Distances for structure motif I are shown on the top and for II on the bottom.

<sup>a</sup> Institut für Organische Chemie, Universität Regensburg, D-93053 Regensburg, Germany. E-mail: ruth.gschwind@chemie.uni-regensburg.de

<sup>b</sup> Institute of Physical and Theoretical Chemistry, University of Regensburg, D-93053, Germany

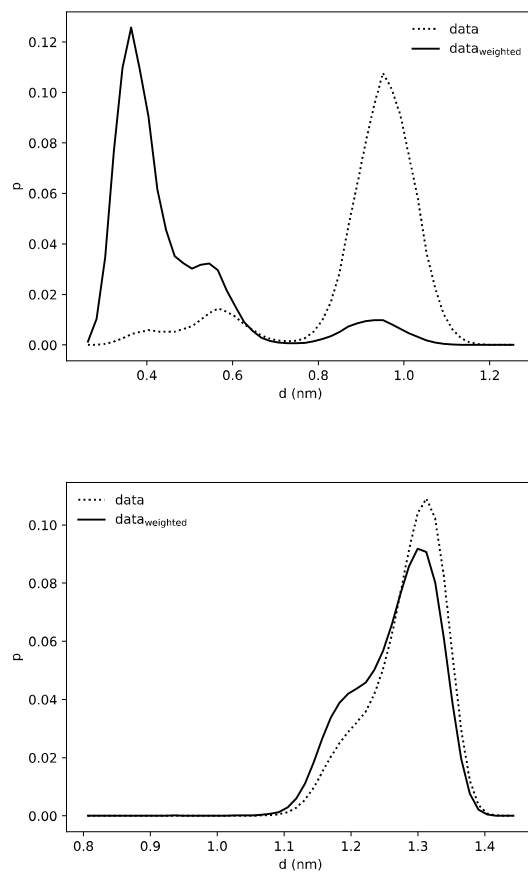

Figure S40:  $r^{-6}$  weighted and unweighted distance distributions between 3 and 11a. Distances for structure motif I are shown on the top and for II on the bottom.

<sup>a</sup> Institut für Organische Chemie, Universität Regensburg, D-93053 Regensburg, Germany. E-mail: ruth.gschwind@chemie.uni-regensburg.de

<sup>b</sup> Institute of Physical and Theoretical Chemistry, University of Regensburg, D-93053, Germany

Distance Distributions related to the NOE-Contacts of the “non- $\alpha$ ” BINOL Side

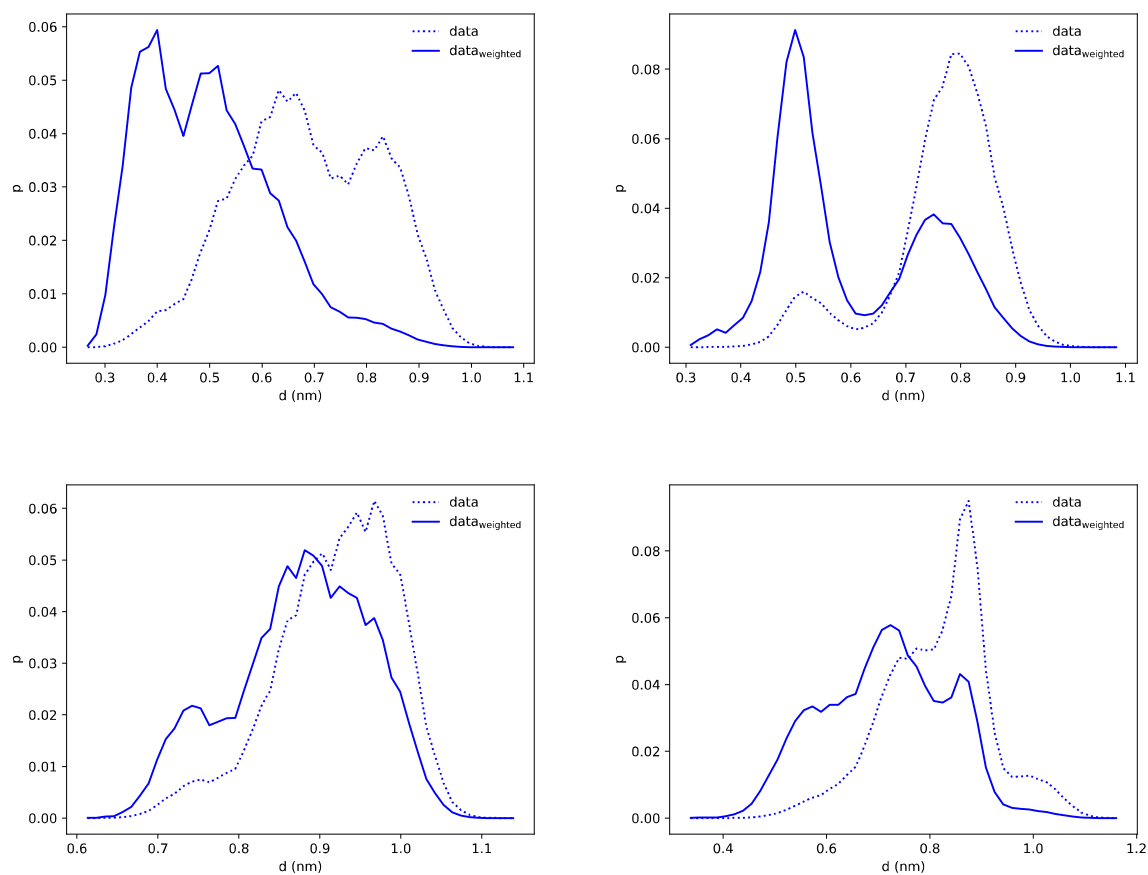

Figure S41:  $r^{-6}$  weighted and unweighted distance distributions between 1 and 8. As there are two possible hydrogen atoms corresponding to position 1, both are shown. Distances for structure motif I are shown on the top and for II on the bottom.

<sup>a</sup> Institut für Organische Chemie, Universität Regensburg, D-93053 Regensburg, Germany. E-mail: ruth.gschwind@chemie.uni-regensburg.de

<sup>b</sup> Institute of Physical and Theoretical Chemistry, University of Regensburg, D-93053, Germany

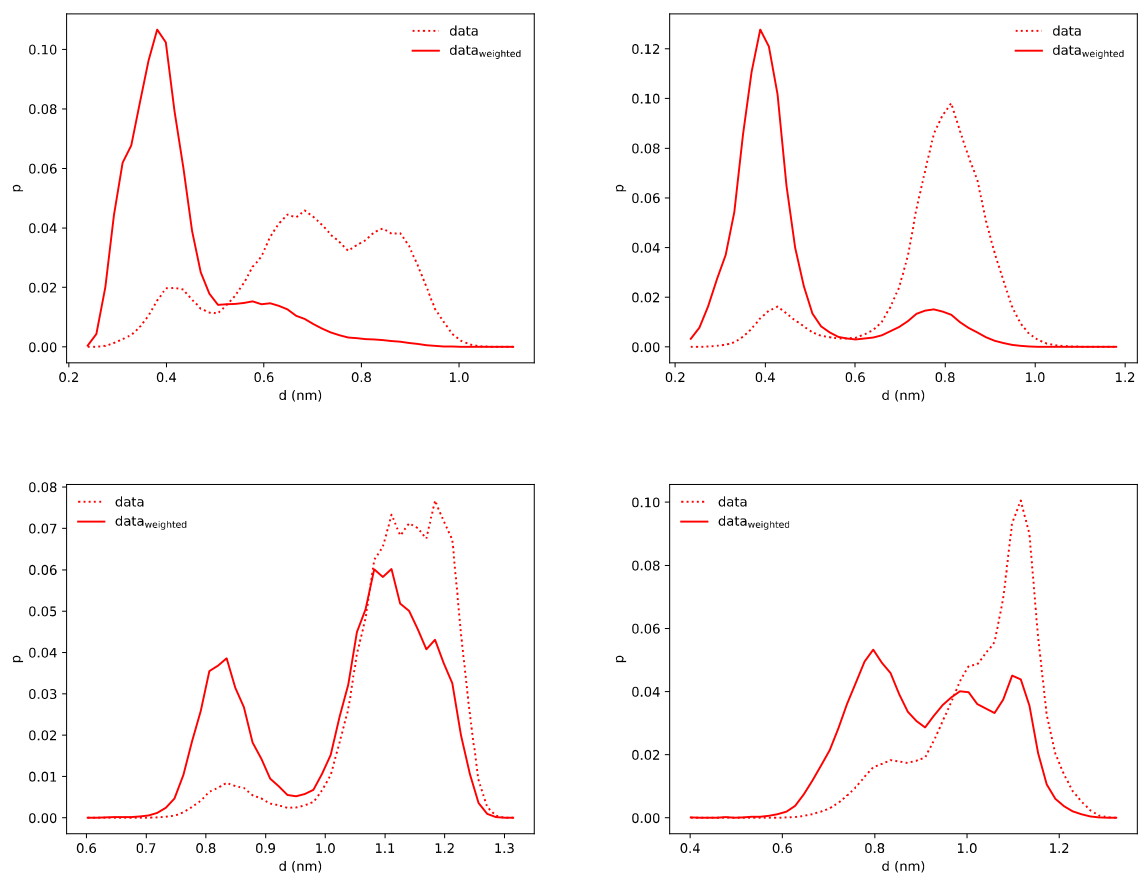

Figure S42:  $r^{-6}$  weighted and unweighted distance distributions between 2 and 8. As there are two possible hydrogen atoms corresponding to position 2, both are shown. Distances for structure motif I are shown on the top and for II on the bottom.

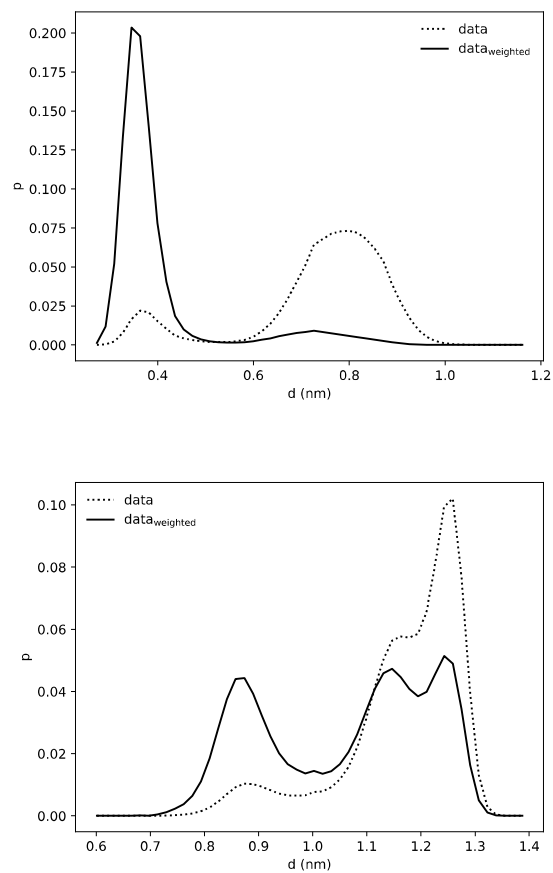

Figure S43:  $r^{-6}$  weighted and unweighted distance distributions between 3 and 8. Distances for structure motif I are shown on the top and for II on the bottom.

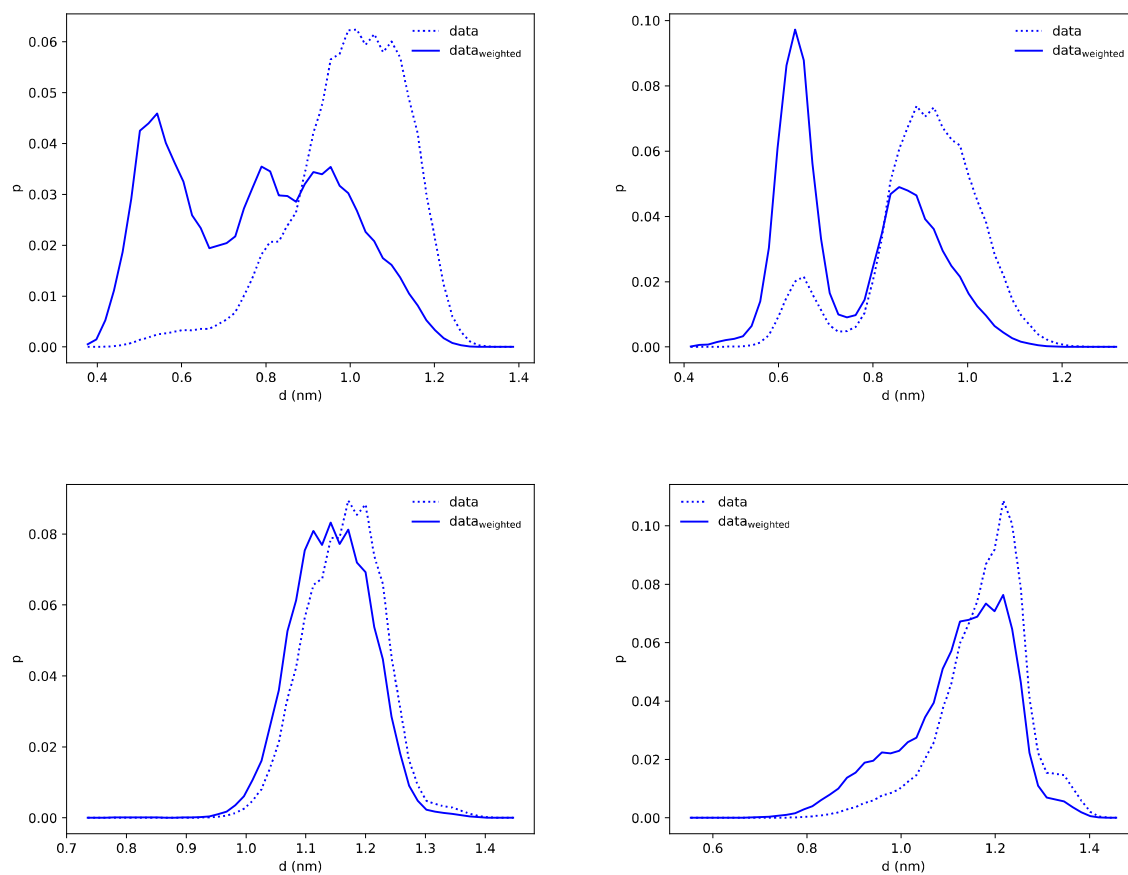

Figure S44:  $r^{-6}$  weighted and unweighted distance distributions between 1 and 9. As there are two possible hydrogen atoms corresponding to position 1, both are shown. Distances for structure motif I are shown on the top and for II on the bottom.



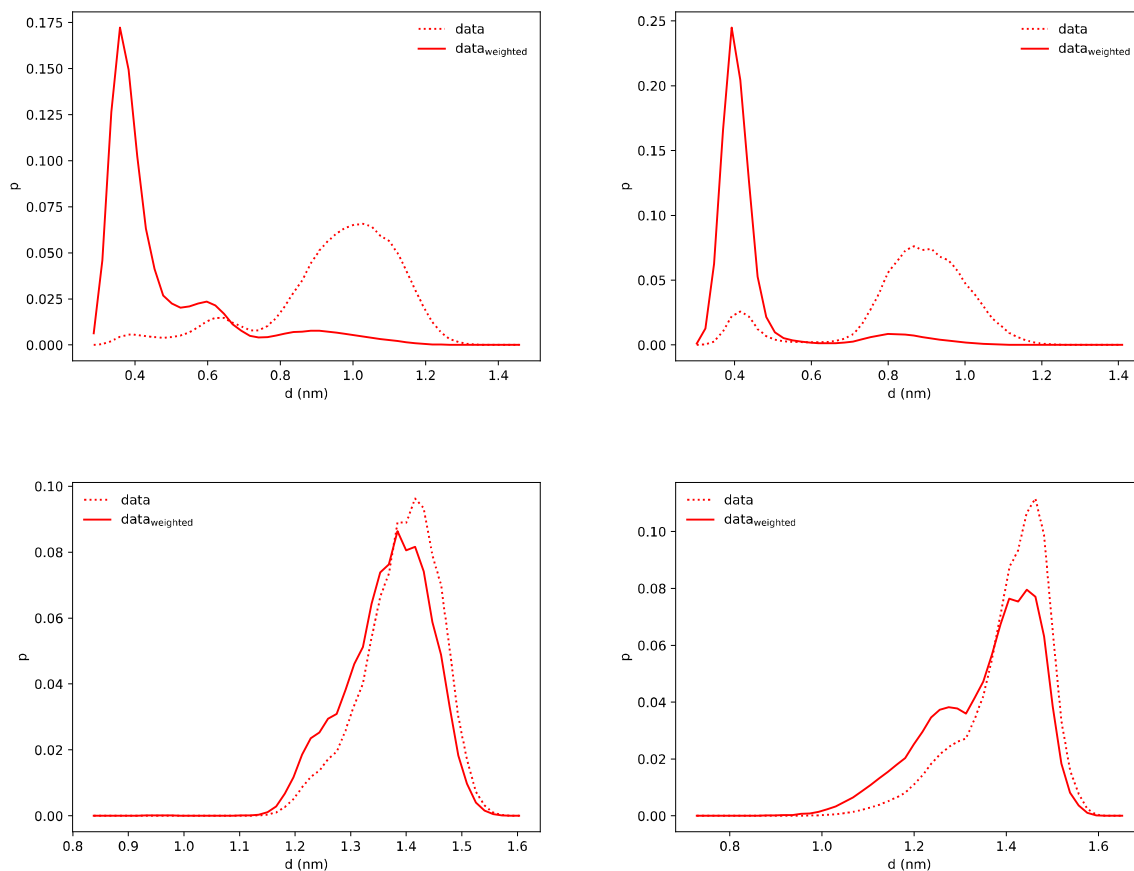

Figure S45:  $r^{-6}$  weighted and unweighted distance distributions between 2 and 9. As there are two possible hydrogen atoms corresponding to position 2, both are shown. Distances for structure motif I are shown on the top and for II on the bottom.

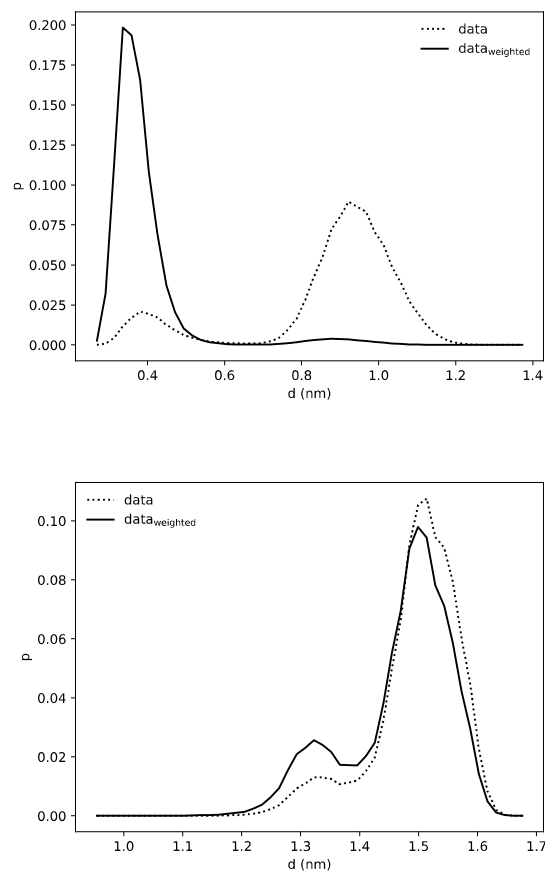

Figure S46:  $r^{-6}$  weighted and unweighted distance distributions between 3 and 9. Distances for structure motif I are shown on the top and for II on the bottom.

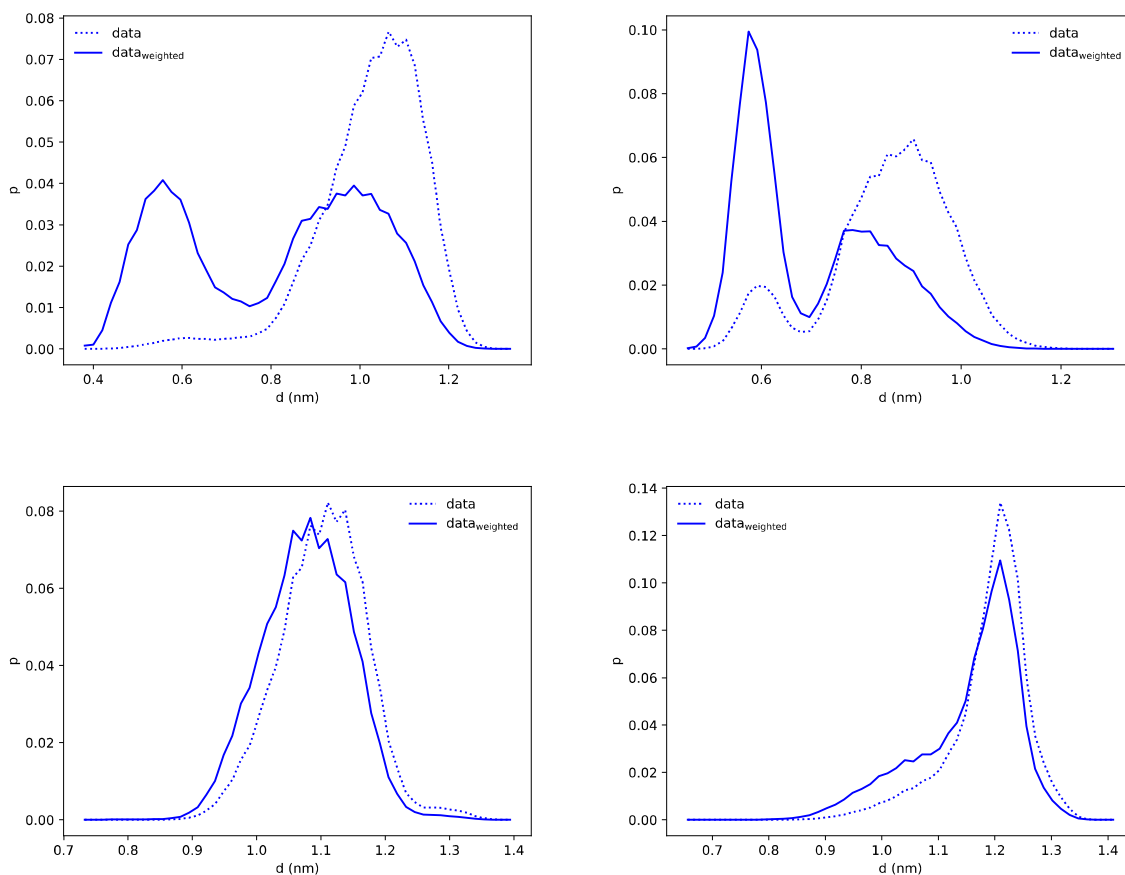

Figure S47:  $r^{-6}$  weighted and unweighted distance distributions between 1 and 10. As there are two possible hydrogen atoms corresponding to position 1, both are shown. Distances for structure motif I are shown on the top and for II on the bottom.

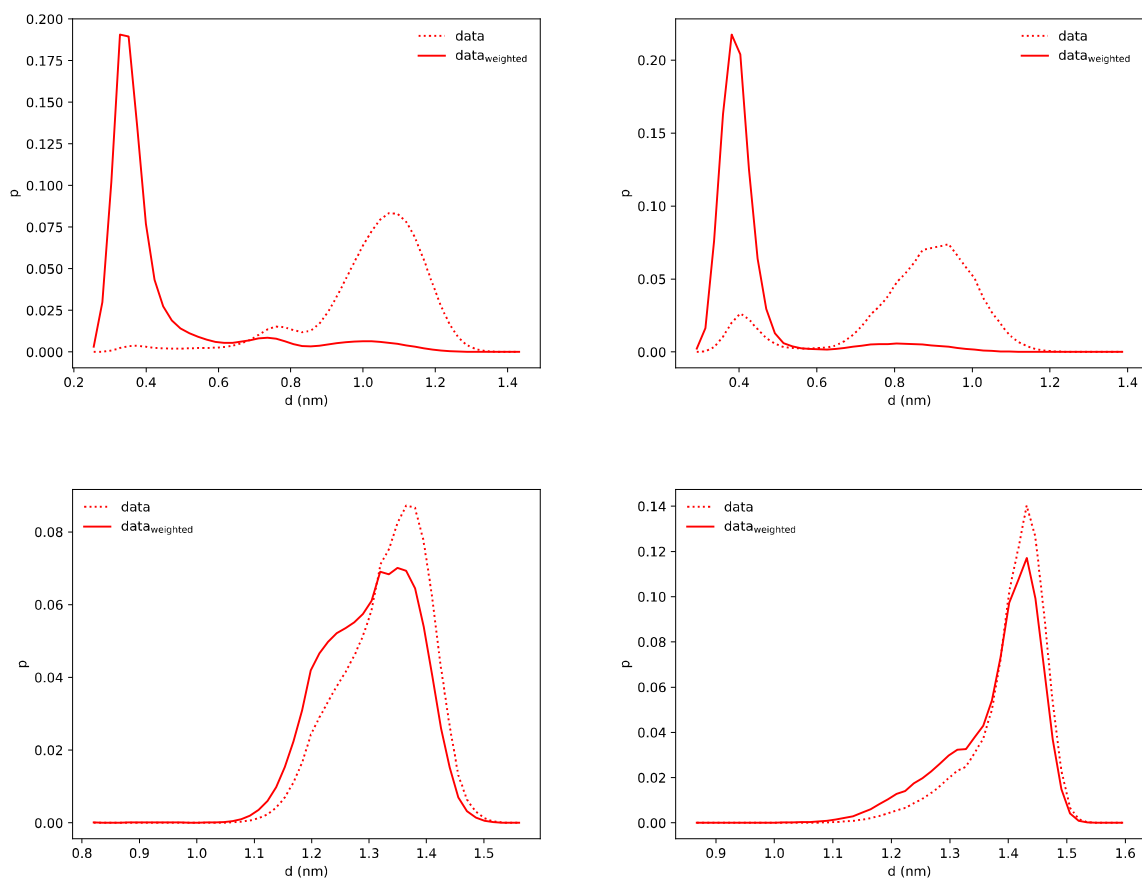

Figure S48:  $r^{-6}$  weighted and unweighted distance distributions between 2 and 10. As there are two possible hydrogen atoms corresponding to position 2, both are shown. Distances for structure motif I are shown on the top and for II on the bottom.

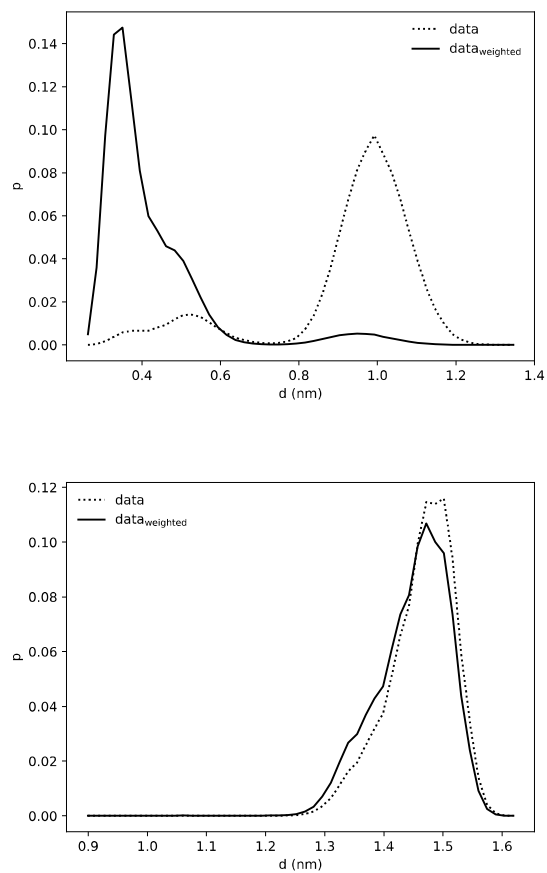

Figure S49:  $r^{-6}$  weighted and unweighted distance distributions between 3 and 10. Distances for structure motif I are shown on the top and for II on the bottom.

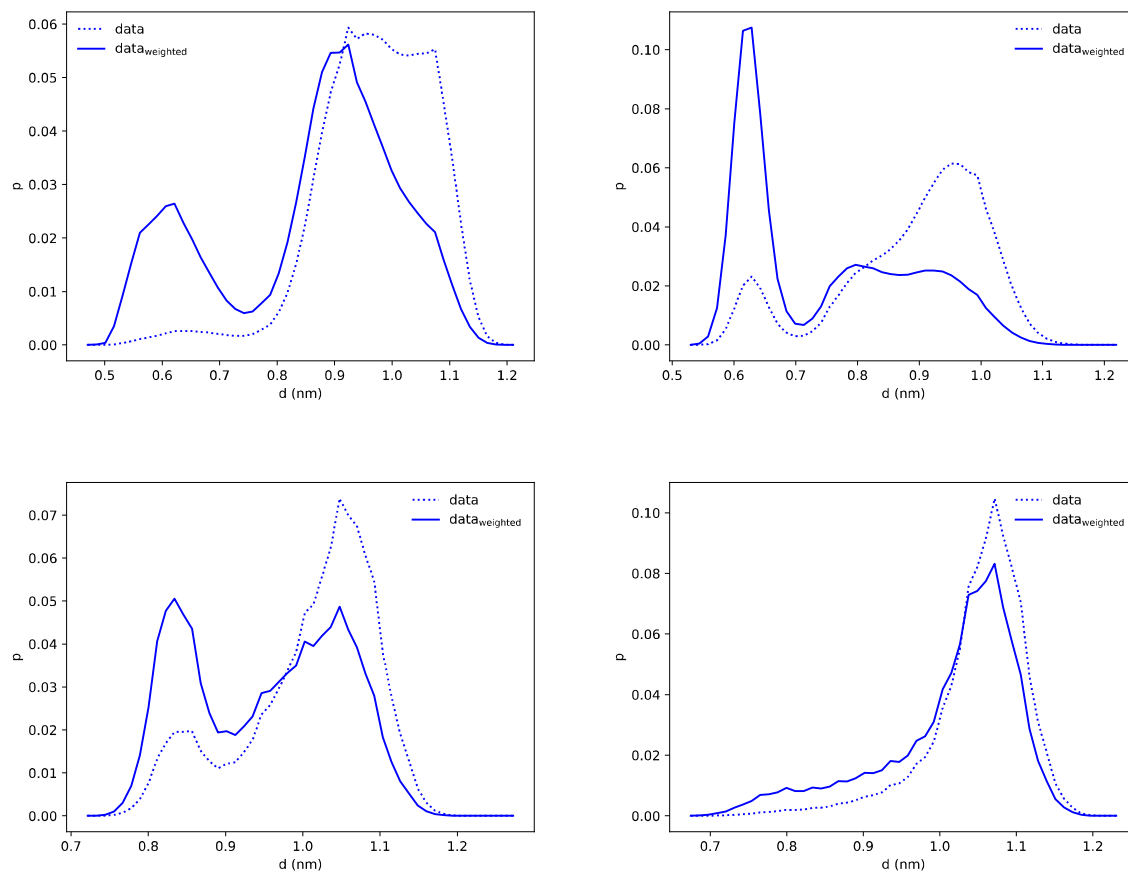

Figure S50:  $r^{-6}$  weighted and unweighted distance distributions between 1 and 11. As there are two possible hydrogen atoms corresponding to position 1, both are shown. Distances for structure motif I are shown on the top and for II on the bottom.

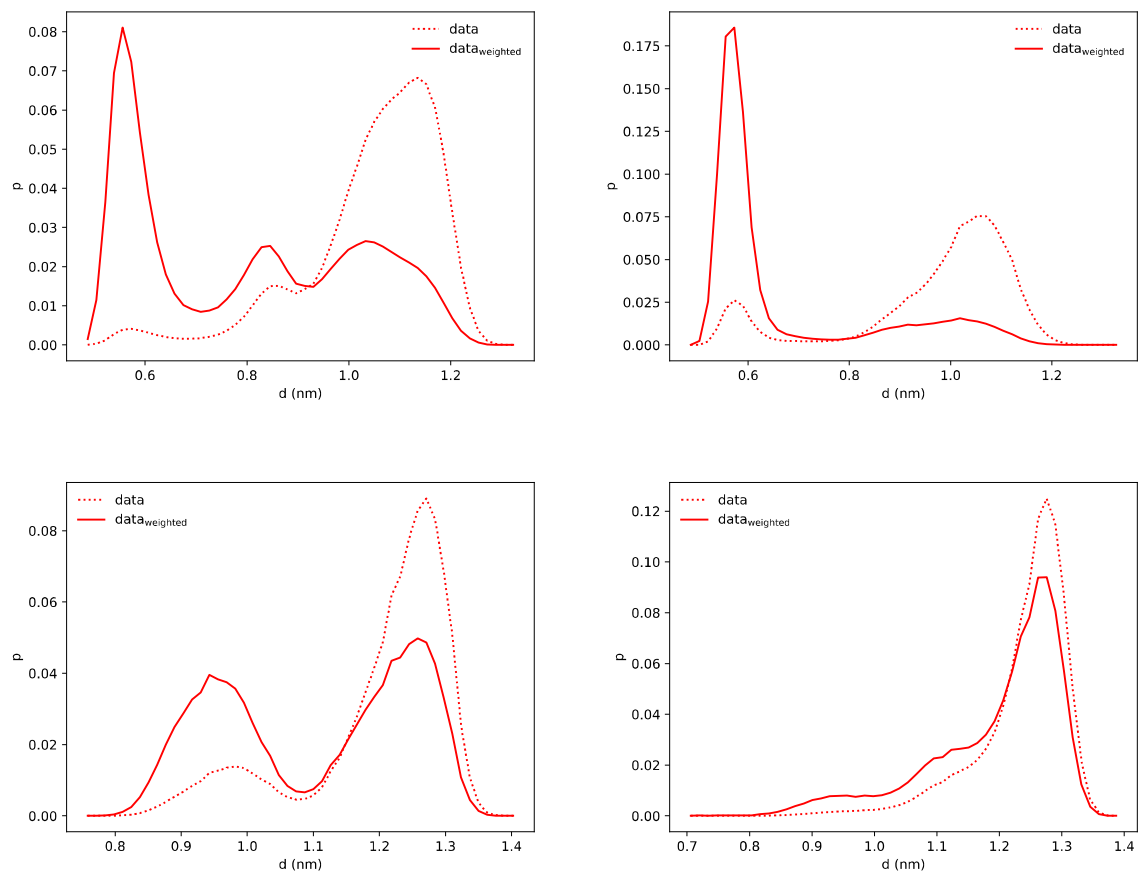

Figure S51:  $r^{-6}$  weighted and unweighted distance distributions between 2 and 11. As there are two possible hydrogen atoms corresponding to position 2, both are shown. Distances for structure motif I are shown on the top and for II on the bottom.

<sup>a</sup> Institut für Organische Chemie, Universität Regensburg, D-93053 Regensburg, Germany. E-mail: ruth.gschwind@chemie.uni-regensburg.de

<sup>b</sup> Institute of Physical and Theoretical Chemistry, University of Regensburg, D-93053, Germany

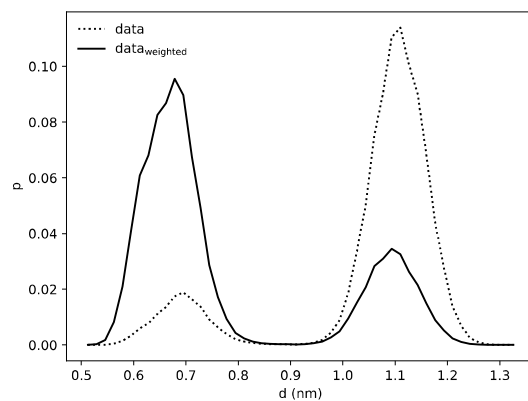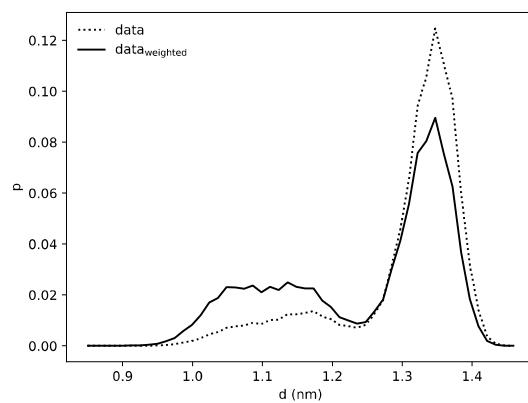

Figure S52:  $r^{-6}$  weighted and unweighted distance distributions between 3 and 11. Distances for structure motif I are shown on the top and for II on the bottom.



*HOE-Signals (involving CF<sub>3</sub> groups)*

*Differentiation between Iminium Positions 1 and 5*

As it couldn't be decided based on the spectra whether the HOE-contacts to **A**, **B** and **C** on the NTPA-molecule were due to the iminium positions **1** or **5**, this is analyzed for the simulation results of structure **I**.

An analysis for structure motif **II** is not done because motif II was already excluded based on the previously shown NOE contacts.

No unambiguous assignment for the NOE-signal to **A**<sub>NTPA</sub> is possible: It either arises from position **1** or **5**. (see Figures S53, S54)

The same holds for the contact to **B**<sub>NTPA</sub>. (see Figures S55, S56)

However, it seems that the contact to **C**<sub>NTPA</sub> is more likely to stem from the **5** position on the imine. (see Figures S57, S58)

---

<sup>a</sup> Institut für Organische Chemie, Universität Regensburg, D-93053 Regensburg, Germany. E-mail: ruth.gschwind@chemie.uni-regensburg.de

<sup>b</sup> Institute of Physical and Theoretical Chemistry, University of Regensburg, D-93053, Germany

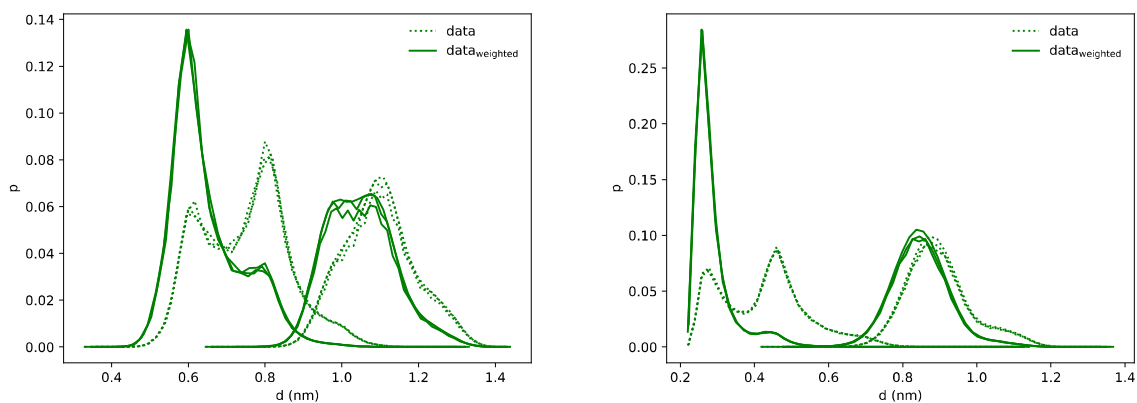

Figure S53: Distance distributions between iminium position 1 and the F atoms of the A ( $CF_3$ ) group.

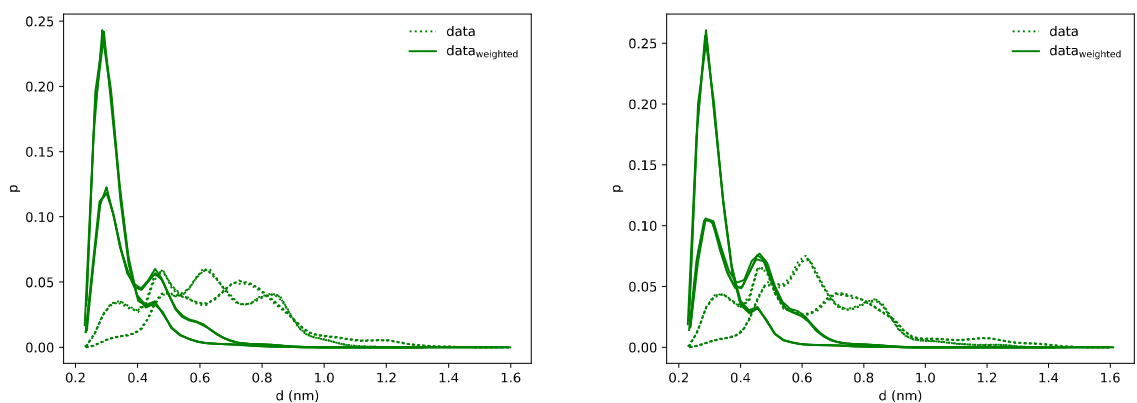

Figure S54: Distance distributions between iminium position 5 and the F atoms of the A ( $CF_3$ ) group.

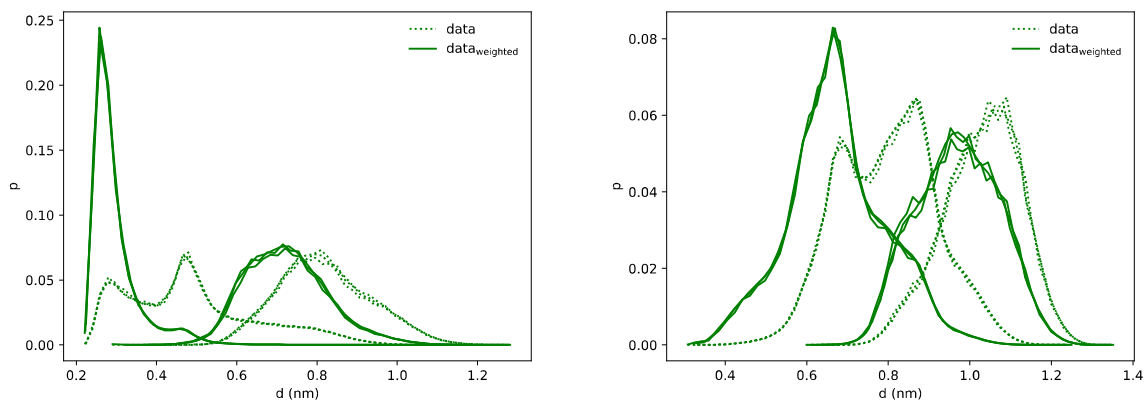

Figure S55: Distance distributions between iminium position 1 and the F atoms of the B (CF<sub>3</sub>) group.

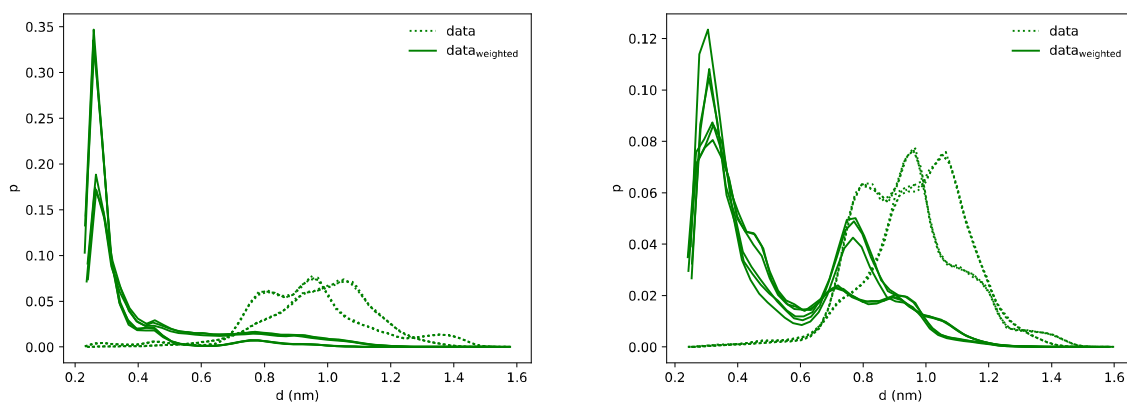

Figure S56: Distance distributions between iminium position 5 and the F atoms of the B (CF<sub>3</sub>) group.

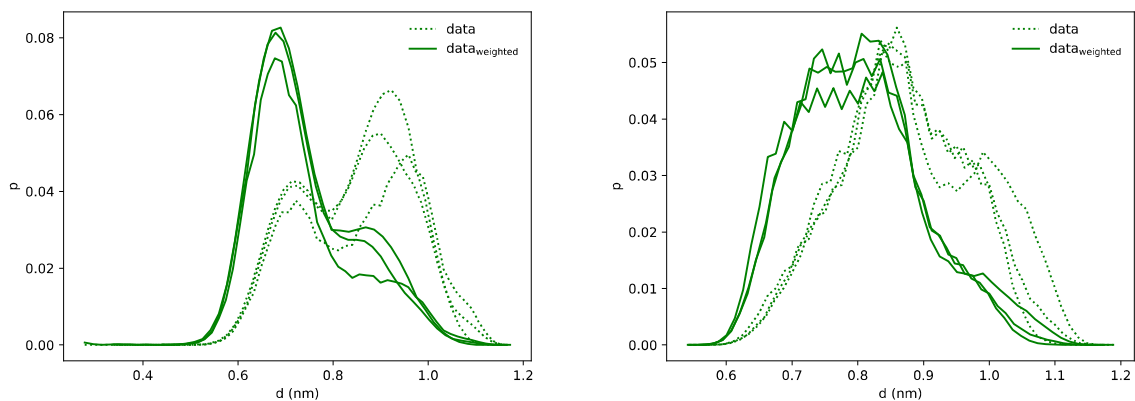

Figure S57: Distance distributions between iminium position 1 and the F atoms of the C (CF<sub>3</sub>) group.

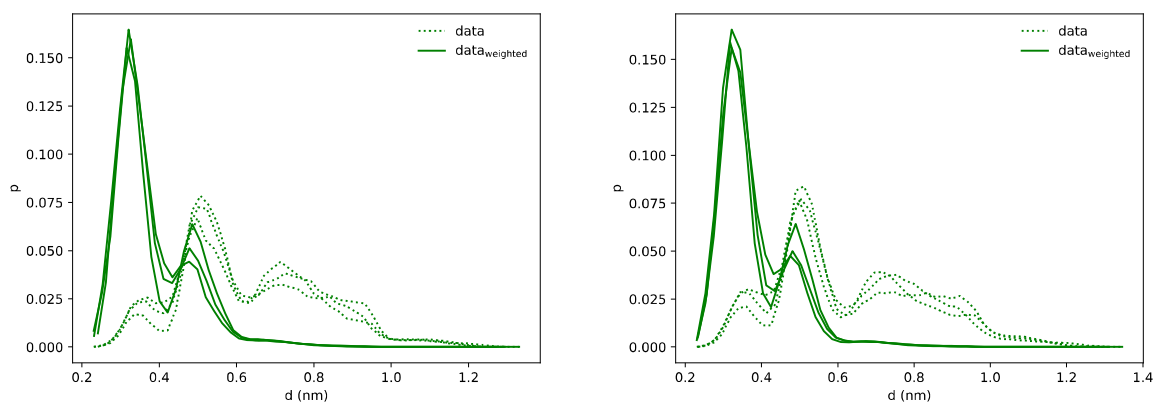

Figure S58: Distance distributions between iminium position 5 and the F atoms of the C (CF<sub>3</sub>) group.

### Distances to the Iminium Methoxy and Methyl Groups

The following figures only show the distance distributions for one of the equivalent H-atoms, because the distributions are representative. For all the distances can correspond to measurable contacts observable in the NMR spectra.

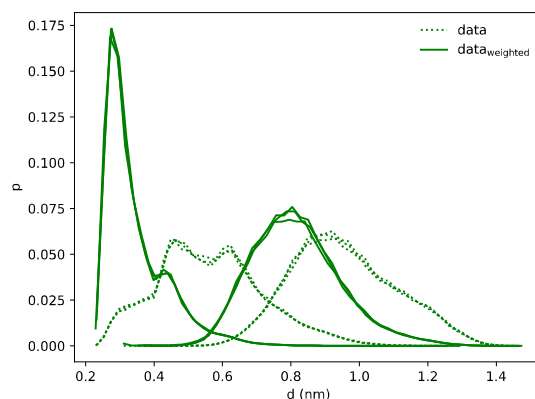

Figure S59:  $r^{-6}$  weighted and unweighted distance distributions between Me and the CF<sub>3</sub> group A. The individual lines shown are for each of the three F atoms of the A group.

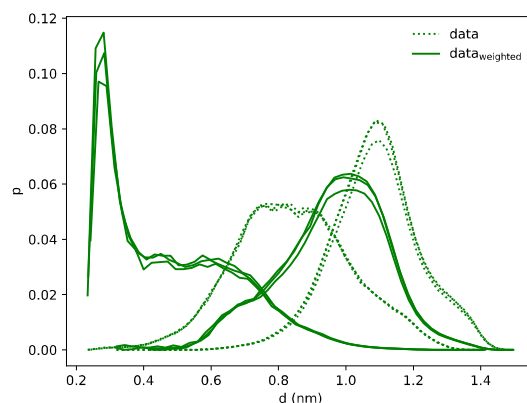

Figure S60:  $r^{-6}$  weighted and unweighted distance distributions between Me and the CF<sub>3</sub> group B. The individual lines shown are for each of the three F atoms of the B group.

<sup>a</sup> Institut für Organische Chemie, Universität Regensburg, D-93053 Regensburg, Germany. E-mail: ruth.gschwind@chemie.uni-regensburg.de

<sup>b</sup> Institute of Physical and Theoretical Chemistry, University of Regensburg, D-93053, Germany

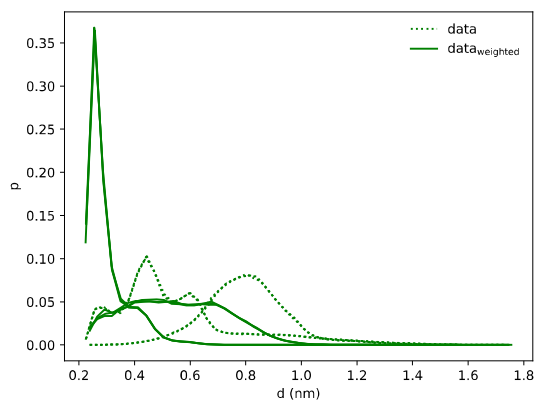

Figure S61:  $r^{-6}$  weighted and unweighted distance distributions between 6 and the  $CF_3$  group A. The individual lines shown are for each of the three F atoms of the A group.

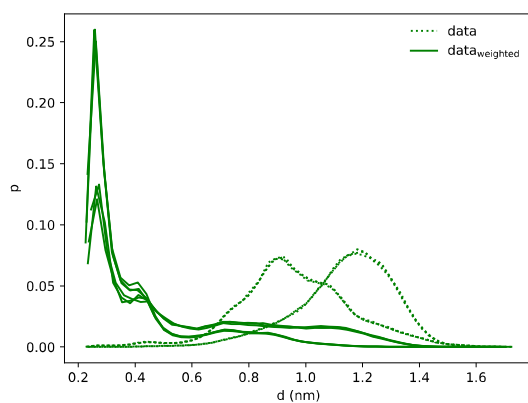

Figure S62:  $r^{-6}$  weighted and unweighted distance distributions between 6 and the  $CF_3$  group B. The individual lines shown are for each of the three F atoms of the B group.

### Multiple Conformers of Interest correspond to structure motif I

The distance distributions frequently contained more than a single distribution for the system of interest **I**. Therefore, differences in the conformation of the cluster are shown below in Figure S63. For differentiation distances, which correspond to NOEs in one case but not in the second case can be used: e.g. Figure S65 depicts the time resolved distance between the iminium position **3** and the position **10**. The exchange on the 1.6  $\mu$ s timescale is a rare event, so no quantitative population assignment is possible just from the simulation data. The times suggest a possible fast exchange on the NMR-timescale, so that a distinction between both species is probably unnecessary. Still, it seems that the right conformer of Figure S63 will be the one detected by its NOE-signals in the NMR and the left conformer (with a 3-10 distance of around 1 nm) should not show NOE signals. An additional DFT geometry optimization of the complex without explicit solvent (details see Methods above), starting from the solvated species (left side in Figure S63) obtained from the MD-simulation converged to the conformation, which corresponds to the NOE signals. This hints at the fact, that the second form (which should not correspond to NOE signals) may result from the solvation.

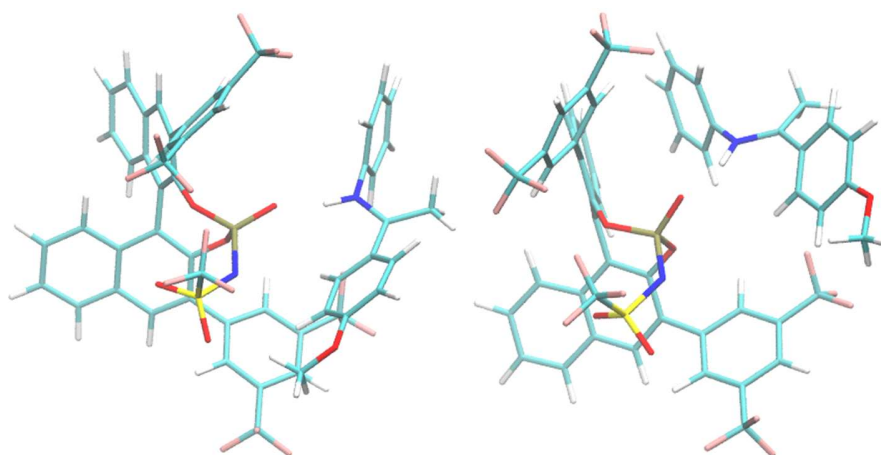

Figure S63: left: conformation with a 3-10 distance of around 1 nm - should not show NOE-signals; right: conformation with a 3-10 distance of around 0.5 nm - NOE-signals can be expected

<sup>a</sup> Institut für Organische Chemie, Universität Regensburg, D-93053 Regensburg, Germany. E-mail: ruth.gschwind@chemie.uni-regensburg.de

<sup>b</sup> Institute of Physical and Theoretical Chemistry, University of Regensburg, D-93053, Germany

### **The H-bond orientation towards the NTPA oxygen atom**

Complex **I** was identified as the most probable one. Considering the charge situation with a  $N^-$ , it seems unintuitive that a H-bond situation seems to occur on the phosphate oxygen. For such systems it is usually assumed that the H-bond occurs via the charged nitrogen atom. In the simulations of **I** closer contacts between the iminium hydrogen and the nitrogen anion had been expected - rather than the oxygen atom.

This stands in apparent opposition to the simulation results and is also surprising considering the charge distribution between oxygen and nitrogen. Figure S64 shows that in the simulations the distance distribution is inverted. The time resolved distances are given in Figure S66. A comparison with the time resolved distances of Figure S65 allows an assignment to the substructures of motif **I**. An additional (DFT) geometry optimization of the complex based on the structures obtained from MD did not deviate from the close oxygen distance compared to the nitrogen distance. In addition, the Mayer bond orders (given below with the optimized structure) resemble the ones of the geometry optimization of the isolated anion (given in Figure S27). While this is clearly no proof, these facts – together with the corresponding NMR evidence – strongly hints at a conformation, which looks like an oxygen-based hydrogen bond in the ground state. This casts doubt on possible transition states via an N-based hydrogen bond. Still, even if the TS occurs via N, it will mean that the TS occurs via a rare event, which is not favored by a pre-organization of the H-bond. This clearly shows that further investigations into the nature and catalytic mechanisms of NTPA systems are required.

---

<sup>a</sup> Institut für Organische Chemie, Universität Regensburg, D-93053 Regensburg, Germany. E-mail: ruth.gschwind@chemie.uni-regensburg.de

<sup>b</sup> Institute of Physical and Theoretical Chemistry, University of Regensburg, D-93053, Germany



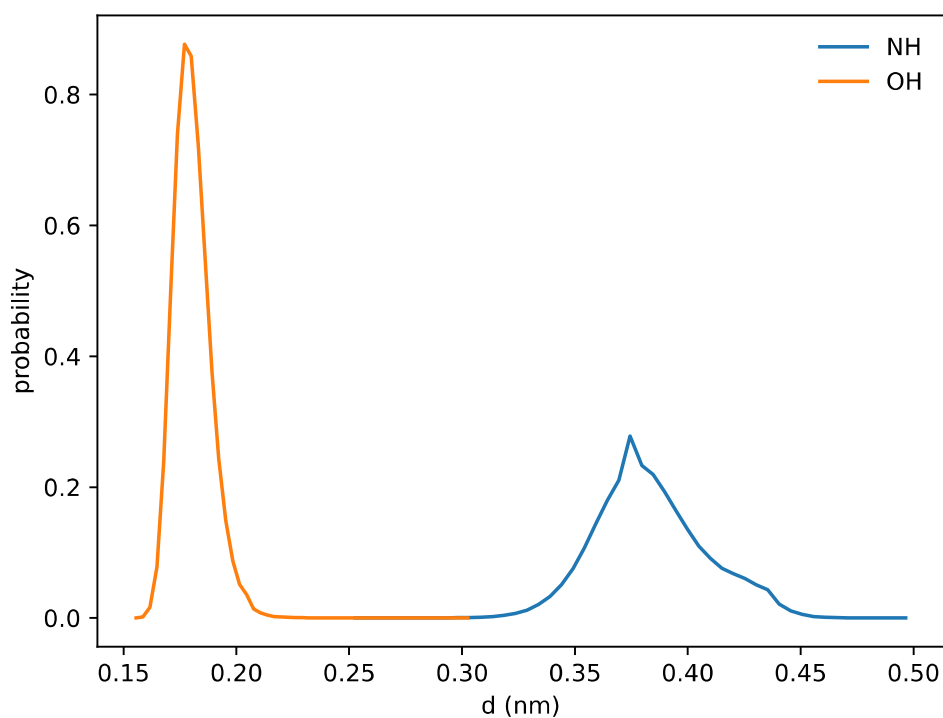

*Figure S64: The distance distribution between groups and the iminium H-binding hydrogen atom suggests H-bonding via the oxygen atom rather than the N.*

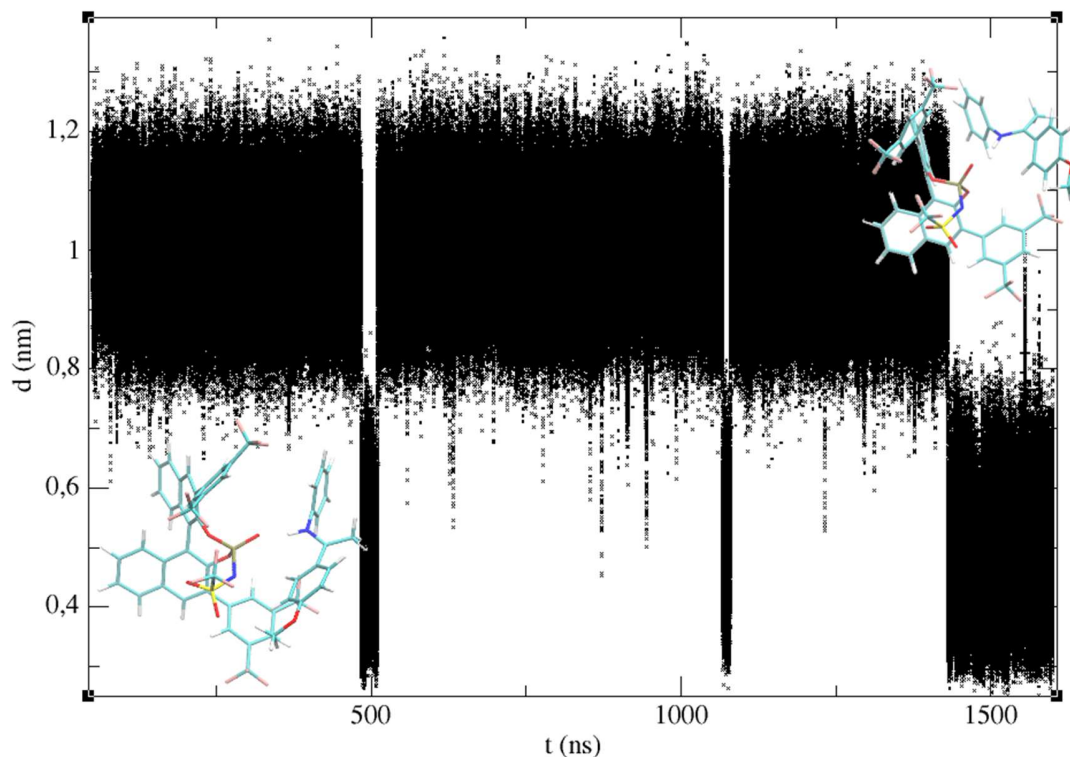

Figure S65: The distance between atoms, which correspond to an observed NOE contact can be used to differentiate species with and without a possible NOE signal provided the change in distances are sufficiently large. This is the case for example for the iminium position 3 and the position 10. It allows for a clear distinction between two different conformers. The exchange on the 1.6  $\mu$ s timescale is a rare event however (5 times for differently long periods), so no quantitative population assignment is possible. The times suggest a possible fast exchange on the NMR-timescale.

<sup>a</sup> Institut für Organische Chemie, Universität Regensburg, D-93053 Regensburg, Germany. E-mail: ruth.gschwind@chemie.uni-regensburg.de

<sup>b</sup> Institute of Physical and Theoretical Chemistry, University of Regensburg, D-93053, Germany

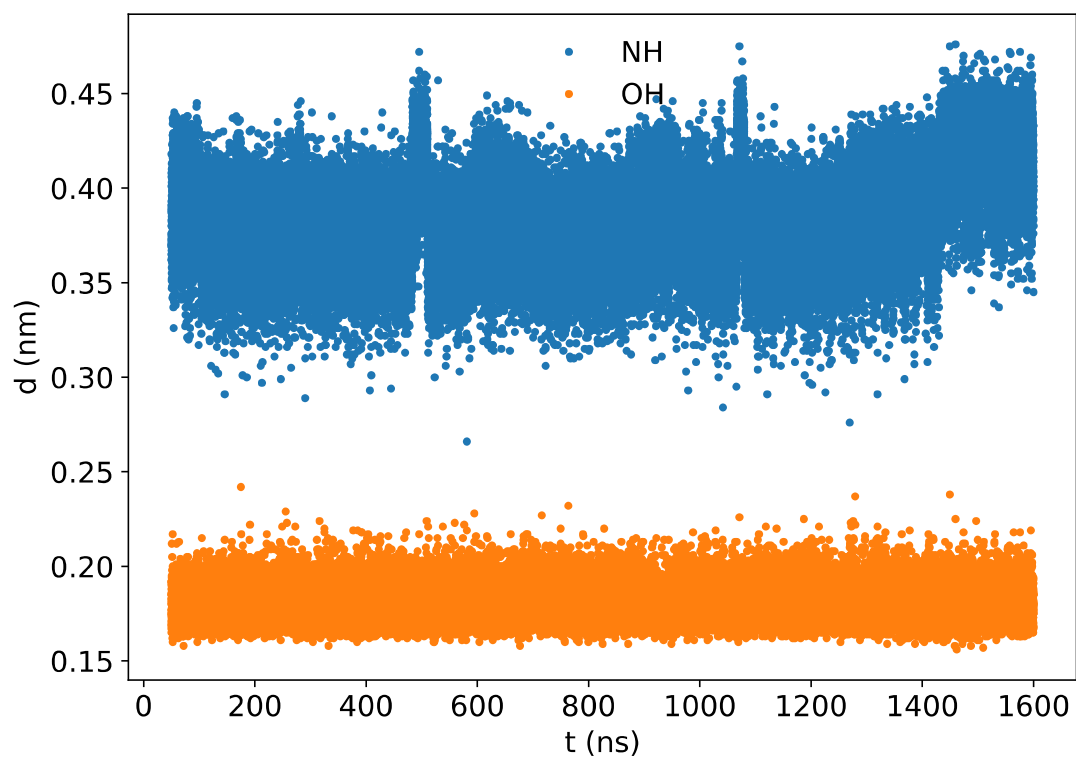

Figure S66: Time resolved distance between atoms on the NTPA (N/O) and the iminium H-binding hydrogen atom

**Potentials of mean force (PMFs) from umbrella sampling along the NTPA N<sup>-</sup> E-iminium H<sup>+</sup> distance suggests the “NTPA oxygen-based” H-bond as the preferred position**

Figure S68 and Figure S67 show the change in free energy for the process of umbrella pulling of the iminium H<sup>+</sup> towards the NTPA N<sup>-</sup> starting from the oxygen-based H-bond situation at around 0.38 nm.

It becomes clear that a second minimum exists closer towards the NTPA N<sup>-</sup>. However, this is not well sampled in the short 180K simulation and long times ( $\mu$ s) are needed to assume convergence for the 300K simulations.

While the actual value of the difference between the most stable (O centered) and the second minimum (between O and N<sup>-</sup>, closer to N<sup>-</sup>) will not be exact due to the assumption for the NTPA group in the forcefield, a qualitative agreement can be expected: that means with the thermal energy at 180K in the NMR the global minimum should be mainly populated, which supports the experimental results.

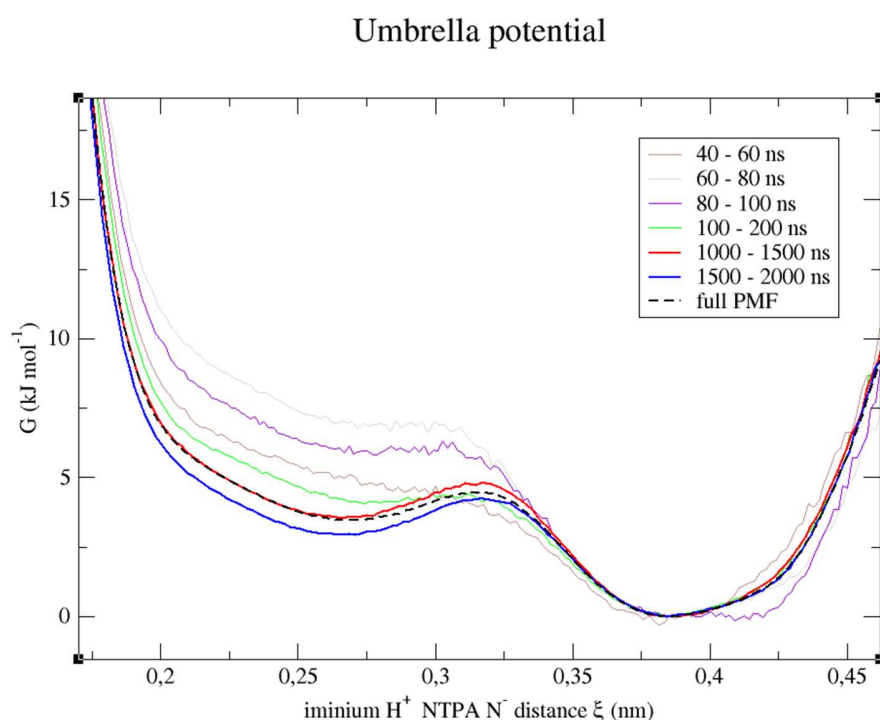

Figure S67: The 300K PMF shows a deeper minimum in the vicinity of the N<sup>-</sup> than the 180K simulation. PMFs of the corresponding sub-trajectories reveal that this is probably due to

<sup>a</sup> Institut für Organische Chemie, Universität Regensburg, D-93053 Regensburg, Germany. E-mail: ruth.gschwind@chemie.uni-regensburg.de

<sup>b</sup> Institute of Physical and Theoretical Chemistry, University of Regensburg, D-93053, Germany

*undersampling of the 180K PMF, and also occurs if only brief sub-trajectories are taken into account. If sufficiently long simulation times are taken into account the estimate of the PMF does (red, blue and dotted black curve) not change significantly.*

---

<sup>a</sup> Institut für Organische Chemie, Universität Regensburg, D-93053 Regensburg, Germany. E-mail: ruth.gschwind@chemie.uni-regensburg.de

<sup>b</sup> Institute of Physical and Theoretical Chemistry, University of Regensburg, D-93053, Germany

## Umbrella potential

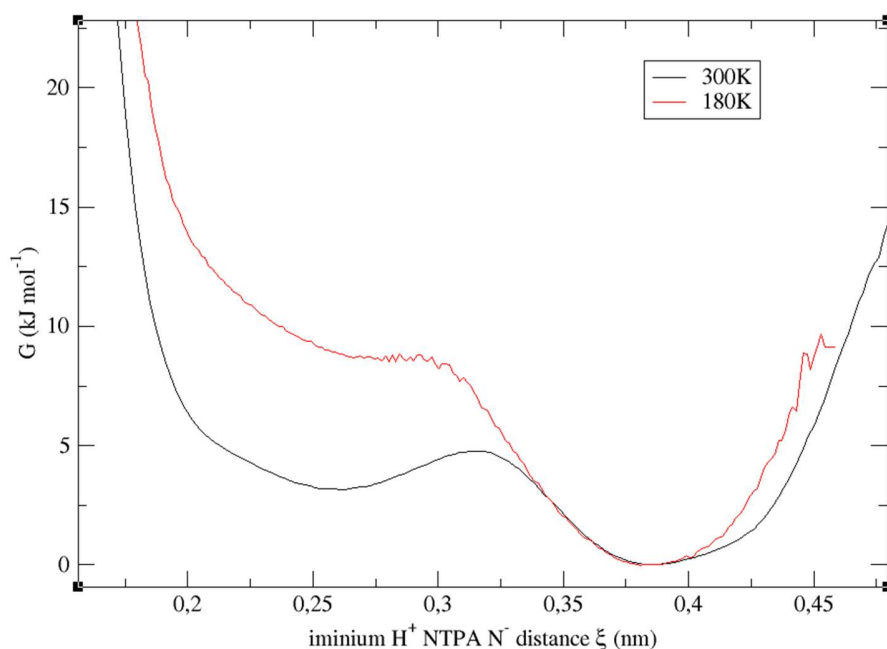

*Figure S68: The PMFs for process of pulling the iminium  $H^+$  towards the NTPA  $N^-$  starting from the “oxygen-bound” H-bond situation (minimum around 0.38nm), reveals a second possible minimum for the simulation at 300K (or plateau in the 180K control simulation, which was not fully converged but does not include the many possible rotations of the 300K simulation). The minimum closer to  $N^-$  (at around 0.2-0.3 nm) is less favored, suggesting the previously found structure with an oxygen based H-bond is prevalent in the system.*

<sup>a</sup> Institut für Organische Chemie, Universität Regensburg, D-93053 Regensburg, Germany. E-mail: ruth.gschwind@chemie.uni-regensburg.de

<sup>b</sup> Institute of Physical and Theoretical Chemistry, University of Regensburg, D-93053, Germany

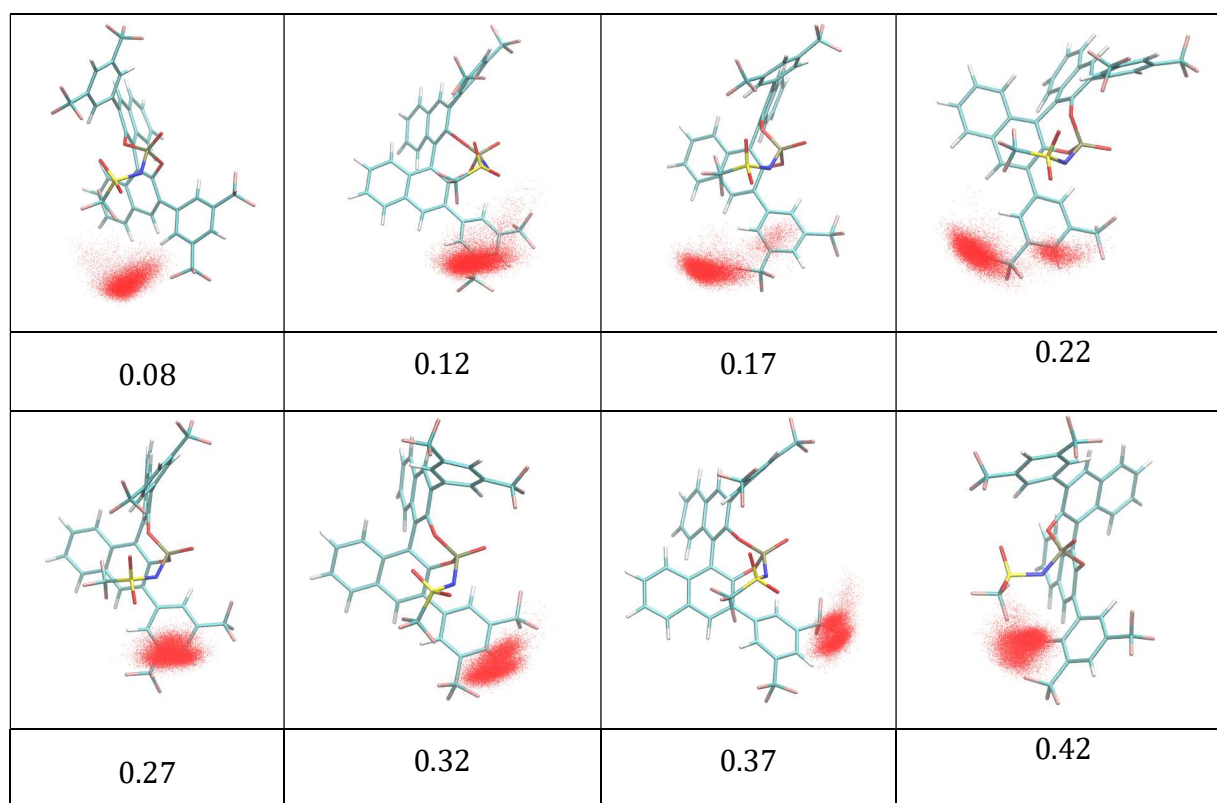

Figure S69: Overlay of 20000 subsequent MD-snapshots at 180K of the iminium methoxy oxygen (red points) relative to its position of the NTPA molecule (first frame shown: frames are rotated+translated to fit the NTPA molecule). The iminium's position is not changing much during the simulation windows.

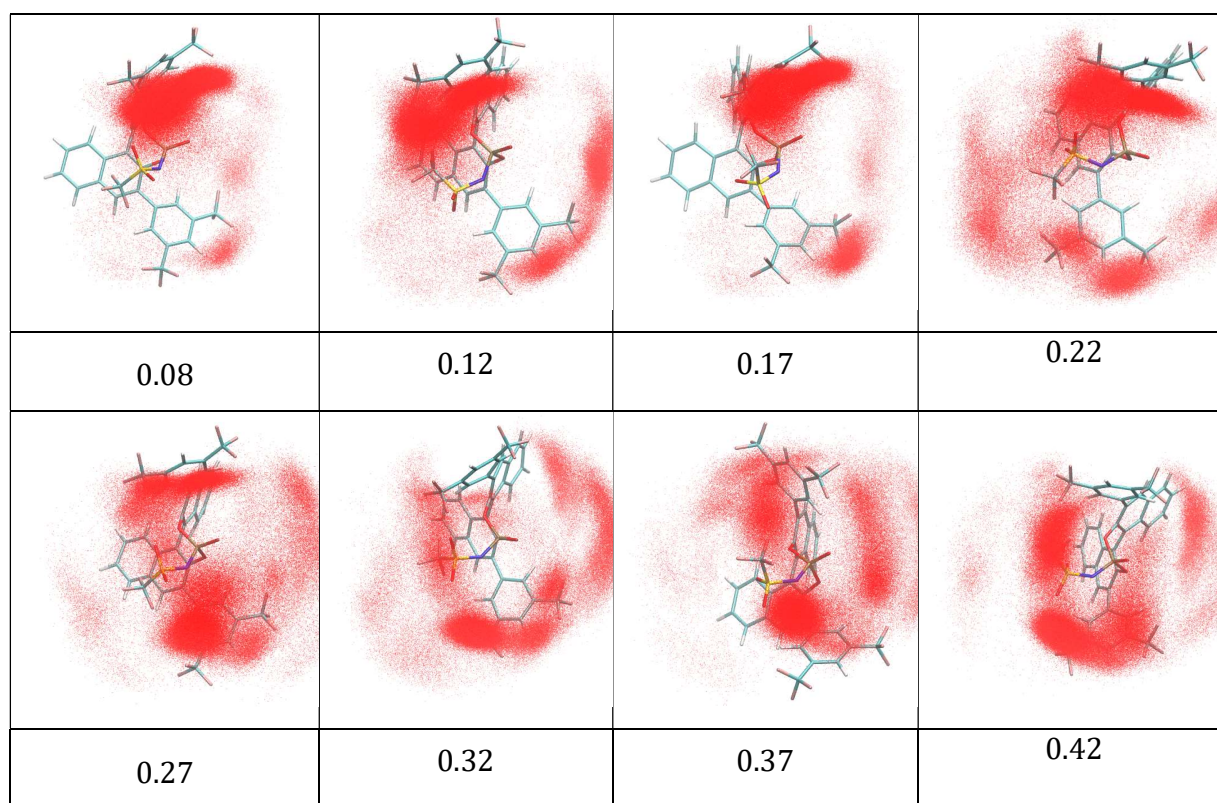

*Figure S70: Overlay of the first 200000 subsequent MD-snapshots at 300K of the iminium methoxy oxygen (red points) relative to its position of the NTPA molecule (first frame shown: frames are rotated+translated to fit the NTPA molecule). The iminium's position is clearly changing during the simulation windows: The deepening of the second minimum in the PMFs at around 0.2-0.3 nm is clearly connected to this process.*

<sup>a</sup> Institut für Organische Chemie, Universität Regensburg, D-93053 Regensburg, Germany. E-mail: ruth.gschwind@chemie.uni-regensburg.de

<sup>b</sup> Institute of Physical and Theoretical Chemistry, University of Regensburg, D-93053, Germany



## Forcefield parameters used for the MD-simulations

NTPA-anion

[ moleculetype ]

;name nrexcl

NTP 3

[ atoms ]

|    |    |   |     |     |    |               |          |
|----|----|---|-----|-----|----|---------------|----------|
| 1  | p5 | 1 | NTP | P   | 1  | 1.1271450579  | 30.97000 |
| 2  | o  | 1 | NTP | O   | 2  | -0.6978260556 | 16.00000 |
| 3  | ne | 1 | NTP | N   | 3  | -0.7417259377 | 14.01000 |
| 4  | os | 1 | NTP | O1  | 4  | -0.4652712854 | 16.00000 |
| 5  | os | 1 | NTP | O2  | 5  | -0.3038336509 | 16.00000 |
| 6  | cp | 1 | NTP | C   | 6  | -0.2713862117 | 12.01000 |
| 7  | ca | 1 | NTP | C1  | 7  | 0.3851728678  | 12.01000 |
| 8  | cp | 1 | NTP | C2  | 8  | -0.1209486910 | 12.01000 |
| 9  | ca | 1 | NTP | C3  | 9  | -0.2692929487 | 12.01000 |
| 10 | ca | 1 | NTP | C4  | 10 | 0.0844331351  | 12.01000 |
| 11 | ca | 1 | NTP | C5  | 11 | -0.2256462747 | 12.01000 |
| 12 | ca | 1 | NTP | C6  | 12 | -0.1345093487 | 12.01000 |
| 13 | ca | 1 | NTP | C7  | 13 | -0.1264692488 | 12.01000 |
| 14 | ca | 1 | NTP | C8  | 14 | -0.3047518097 | 12.01000 |
| 15 | ca | 1 | NTP | C9  | 15 | 0.3681113917  | 12.01000 |
| 16 | cp | 1 | NTP | C10 | 16 | 0.0214851165  | 12.01000 |
| 17 | ca | 1 | NTP | C11 | 17 | 0.1536764988  | 12.01000 |
| 18 | cp | 1 | NTP | C12 | 18 | -0.0531660126 | 12.01000 |
| 19 | ca | 1 | NTP | C13 | 19 | -0.3569141602 | 12.01000 |
| 20 | ca | 1 | NTP | C14 | 20 | 0.2948932857  | 12.01000 |

<sup>a</sup> Institut für Organische Chemie, Universität Regensburg, D-93053 Regensburg, Germany. E-mail: ruth.gschwind@chemie.uni-regensburg.de

<sup>b</sup> Institute of Physical and Theoretical Chemistry, University of Regensburg, D-93053, Germany

|    |    |   |     |     |    |               |          |
|----|----|---|-----|-----|----|---------------|----------|
| 21 | ca | 1 | NTP | C15 | 21 | -0.3024262197 | 12.01000 |
| 22 | ca | 1 | NTP | C16 | 22 | -0.0778468635 | 12.01000 |
| 23 | ca | 1 | NTP | C17 | 23 | -0.2249180615 | 12.01000 |
| 24 | ca | 1 | NTP | C18 | 24 | -0.0360539262 | 12.01000 |
| 25 | ca | 1 | NTP | C19 | 25 | -0.0530868561 | 12.01000 |
| 26 | cp | 1 | NTP | C20 | 26 | 0.2842854286  | 12.01000 |
| 27 | cp | 1 | NTP | C21 | 27 | 0.2988807348  | 12.01000 |
| 28 | sy | 1 | NTP | S   | 28 | 0.9467154126  | 32.06000 |
| 29 | o  | 1 | NTP | O3  | 29 | -0.5921943706 | 16.00000 |
| 30 | o  | 1 | NTP | O4  | 30 | -0.5688279615 | 16.00000 |
| 31 | c3 | 1 | NTP | C22 | 31 | 0.4100038100  | 12.01000 |
| 32 | f  | 1 | NTP | F   | 32 | -0.1610135216 | 19.00000 |
| 33 | f  | 1 | NTP | F1  | 33 | -0.1610135216 | 19.00000 |
| 34 | f  | 1 | NTP | F2  | 34 | -0.1610135216 | 19.00000 |
| 35 | ca | 1 | NTP | C23 | 35 | -0.2815115983 | 12.01000 |
| 36 | ca | 1 | NTP | C24 | 36 | 0.0263520303  | 12.01000 |
| 37 | ca | 1 | NTP | C25 | 37 | -0.2124409418 | 12.01000 |
| 38 | ca | 1 | NTP | C26 | 38 | -0.0016129669 | 12.01000 |
| 39 | ca | 1 | NTP | C27 | 39 | -0.2445550345 | 12.01000 |
| 40 | ca | 1 | NTP | C28 | 40 | -0.2651172589 | 12.01000 |
| 41 | ca | 1 | NTP | C29 | 41 | -0.0011313726 | 12.01000 |
| 42 | ca | 1 | NTP | C30 | 42 | -0.1852256654 | 12.01000 |
| 43 | ca | 1 | NTP | C31 | 43 | 0.0381590648  | 12.01000 |
| 44 | ca | 1 | NTP | C32 | 44 | -0.2593918241 | 12.01000 |
| 45 | c3 | 1 | NTP | C33 | 45 | 0.6181732748  | 12.01000 |
| 46 | f  | 1 | NTP | F3  | 46 | -0.2206155246 | 19.00000 |
| 47 | f  | 1 | NTP | F4  | 47 | -0.2206155246 | 19.00000 |
| 48 | f  | 1 | NTP | F5  | 48 | -0.2206155246 | 19.00000 |
| 49 | c3 | 1 | NTP | C34 | 49 | 0.6282597501  | 12.01000 |
| 50 | f  | 1 | NTP | F6  | 50 | -0.2245655745 | 19.00000 |

---

<sup>a</sup> Institut für Organische Chemie, Universität Regensburg, D-93053 Regensburg, Germany. E-mail: ruth.gschwind@chemie.uni-regensburg.de

<sup>b</sup> Institute of Physical and Theoretical Chemistry, University of Regensburg, D-93053, Germany

|    |    |   |     |     |    |               |          |
|----|----|---|-----|-----|----|---------------|----------|
| 51 | f  | 1 | NTP | F7  | 51 | -0.2245655745 | 19.00000 |
| 52 | f  | 1 | NTP | F8  | 52 | -0.2245655745 | 19.00000 |
| 53 | c3 | 1 | NTP | C35 | 53 | 0.5493890203  | 12.01000 |
| 54 | f  | 1 | NTP | F9  | 54 | -0.2035594284 | 19.00000 |
| 55 | f  | 1 | NTP | F10 | 55 | -0.2035594284 | 19.00000 |
| 56 | f  | 1 | NTP | F11 | 56 | -0.2035594284 | 19.00000 |
| 57 | c3 | 1 | NTP | C36 | 57 | 0.6217899328  | 12.01000 |
| 58 | f  | 1 | NTP | F12 | 58 | -0.2224720550 | 19.00000 |
| 59 | f  | 1 | NTP | F13 | 59 | -0.2224720550 | 19.00000 |
| 60 | f  | 1 | NTP | F14 | 60 | -0.2224720550 | 19.00000 |
| 61 | ha | 1 | NTP | H   | 61 | 0.1811800175  | 1.00800  |
| 62 | ha | 1 | NTP | H1  | 62 | 0.1558360623  | 1.00800  |
| 63 | ha | 1 | NTP | H2  | 63 | 0.1411753796  | 1.00800  |
| 64 | ha | 1 | NTP | H3  | 64 | 0.1432679458  | 1.00800  |
| 65 | ha | 1 | NTP | H4  | 65 | 0.1691164871  | 1.00800  |
| 66 | ha | 1 | NTP | H5  | 66 | 0.1847317680  | 1.00800  |
| 67 | ha | 1 | NTP | H6  | 67 | 0.1681273015  | 1.00800  |
| 68 | ha | 1 | NTP | H7  | 68 | 0.1334808251  | 1.00800  |
| 69 | ha | 1 | NTP | H8  | 69 | 0.1618543896  | 1.00800  |
| 70 | ha | 1 | NTP | H9  | 70 | 0.0691988656  | 1.00800  |
| 71 | ha | 1 | NTP | H10 | 71 | 0.1740367411  | 1.00800  |
| 72 | ha | 1 | NTP | H11 | 72 | 0.1770541639  | 1.00800  |
| 73 | ha | 1 | NTP | H12 | 73 | 0.2260367016  | 1.00800  |
| 74 | ha | 1 | NTP | H13 | 74 | 0.1835987238  | 1.00800  |
| 75 | ha | 1 | NTP | H14 | 75 | 0.1683930151  | 1.00800  |
| 76 | ha | 1 | NTP | H15 | 76 | 0.1807466697  | 1.00800  |

[ bonds ]

; ai aj funct r k  
 1 2 1 1.4866e-01 4.0125e+05; P - O  
 1 3 1 1.6050e-01 3.6685e+05; P - N

<sup>a</sup> Institut für Organische Chemie, Universität Regensburg, D-93053 Regensburg, Germany. E-mail: ruth.gschwind@chemie.uni-regensburg.de

<sup>b</sup> Institute of Physical and Theoretical Chemistry, University of Regensburg, D-93053, Germany

1 4 1 1.6147e-01 2.7665e+05; P - O1  
1 5 1 1.6147e-01 2.7665e+05; P - O2  
3 28 1 1.6723e-01 2.6535e+05; N - S  
4 7 1 1.3696e-01 3.1514e+05; O1 - C1  
5 17 1 1.3696e-01 3.1514e+05; O2 - C11  
6 7 1 1.4058e-01 3.7673e+05; C - C1  
6 15 1 1.4058e-01 3.7673e+05; C - C9  
6 16 1 1.4854e-01 2.9405e+05; C - C10  
7 8 1 1.4058e-01 3.7673e+05; C1 - C2  
8 9 1 1.4058e-01 3.7673e+05; C2 - C3  
8 27 1 1.4854e-01 2.9405e+05; C2 - C21  
9 10 1 1.3984e-01 3.8585e+05; C3 - C4  
9 61 1 1.0860e-01 2.8937e+05; C3 - H  
10 11 1 1.3984e-01 3.8585e+05; C4 - C5  
10 15 1 1.3984e-01 3.8585e+05; C4 - C9  
11 12 1 1.3984e-01 3.8585e+05; C5 - C6  
11 62 1 1.0860e-01 2.8937e+05; C5 - H1  
12 13 1 1.3984e-01 3.8585e+05; C6 - C7  
12 63 1 1.0860e-01 2.8937e+05; C6 - H2  
13 14 1 1.3984e-01 3.8585e+05; C7 - C8  
13 64 1 1.0860e-01 2.8937e+05; C7 - H3  
14 15 1 1.3984e-01 3.8585e+05; C8 - C9  
14 65 1 1.0860e-01 2.8937e+05; C8 - H4  
16 17 1 1.4058e-01 3.7673e+05; C10 - C11  
16 25 1 1.4058e-01 3.7673e+05; C10 - C19  
17 18 1 1.4058e-01 3.7673e+05; C11 - C12  
18 19 1 1.4058e-01 3.7673e+05; C12 - C13  
18 26 1 1.4854e-01 2.9405e+05; C12 - C20  
19 20 1 1.3984e-01 3.8585e+05; C13 - C14  
19 66 1 1.0860e-01 2.8937e+05; C13 - H5

---

<sup>a</sup> Institut für Organische Chemie, Universität Regensburg, D-93053 Regensburg, Germany. E-mail: ruth.gschwind@chemie.uni-regensburg.de

<sup>b</sup> Institute of Physical and Theoretical Chemistry, University of Regensburg, D-93053, Germany

|    |    |   |            |            |             |
|----|----|---|------------|------------|-------------|
| 20 | 21 | 1 | 1.3984e-01 | 3.8585e+05 | ; C14 - C15 |
| 20 | 25 | 1 | 1.3984e-01 | 3.8585e+05 | ; C14 - C19 |
| 21 | 22 | 1 | 1.3984e-01 | 3.8585e+05 | ; C15 - C16 |
| 21 | 67 | 1 | 1.0860e-01 | 2.8937e+05 | ; C15 - H6  |
| 22 | 23 | 1 | 1.3984e-01 | 3.8585e+05 | ; C16 - C17 |
| 22 | 68 | 1 | 1.0860e-01 | 2.8937e+05 | ; C16 - H7  |
| 23 | 24 | 1 | 1.3984e-01 | 3.8585e+05 | ; C17 - C18 |
| 23 | 69 | 1 | 1.0860e-01 | 2.8937e+05 | ; C17 - H8  |
| 24 | 25 | 1 | 1.3984e-01 | 3.8585e+05 | ; C18 - C19 |
| 24 | 70 | 1 | 1.0860e-01 | 2.8937e+05 | ; C18 - H9  |
| 26 | 40 | 1 | 1.4058e-01 | 3.7673e+05 | ; C20 - C28 |
| 26 | 44 | 1 | 1.4058e-01 | 3.7673e+05 | ; C20 - C32 |
| 27 | 35 | 1 | 1.4058e-01 | 3.7673e+05 | ; C21 - C23 |
| 27 | 39 | 1 | 1.4058e-01 | 3.7673e+05 | ; C21 - C27 |
| 28 | 29 | 1 | 1.4660e-01 | 4.1254e+05 | ; S - 03    |
| 28 | 30 | 1 | 1.4660e-01 | 4.1254e+05 | ; S - 04    |
| 28 | 31 | 1 | 1.8087e-01 | 1.9481e+05 | ; S - C22   |
| 31 | 32 | 1 | 1.3497e-01 | 2.9865e+05 | ; C22 - F   |
| 31 | 33 | 1 | 1.3497e-01 | 2.9865e+05 | ; C22 - F1  |
| 31 | 34 | 1 | 1.3497e-01 | 2.9865e+05 | ; C22 - F2  |
| 35 | 36 | 1 | 1.3984e-01 | 3.8585e+05 | ; C23 - C24 |
| 35 | 71 | 1 | 1.0860e-01 | 2.8937e+05 | ; C23 - H10 |
| 36 | 37 | 1 | 1.3984e-01 | 3.8585e+05 | ; C24 - C25 |
| 36 | 49 | 1 | 1.5156e-01 | 2.6861e+05 | ; C24 - C34 |
| 37 | 38 | 1 | 1.3984e-01 | 3.8585e+05 | ; C25 - C26 |
| 37 | 72 | 1 | 1.0860e-01 | 2.8937e+05 | ; C25 - H11 |
| 38 | 39 | 1 | 1.3984e-01 | 3.8585e+05 | ; C26 - C27 |
| 38 | 45 | 1 | 1.5156e-01 | 2.6861e+05 | ; C26 - C33 |
| 39 | 73 | 1 | 1.0860e-01 | 2.8937e+05 | ; C27 - H12 |
| 40 | 41 | 1 | 1.3984e-01 | 3.8585e+05 | ; C28 - C29 |

---

<sup>a</sup> Institut für Organische Chemie, Universität Regensburg, D-93053 Regensburg, Germany. E-mail: ruth.gschwind@chemie.uni-regensburg.de

<sup>b</sup> Institute of Physical and Theoretical Chemistry, University of Regensburg, D-93053, Germany

40 74 1 1.0860e-01 2.8937e+05 ; C28 - H13  
 41 42 1 1.3984e-01 3.8585e+05 ; C29 - C30  
 41 57 1 1.5156e-01 2.6861e+05 ; C29 - C36  
 42 43 1 1.3984e-01 3.8585e+05 ; C30 - C31  
 42 75 1 1.0860e-01 2.8937e+05 ; C30 - H14  
 43 44 1 1.3984e-01 3.8585e+05 ; C31 - C32  
 43 53 1 1.5156e-01 2.6861e+05 ; C31 - C35  
 44 76 1 1.0860e-01 2.8937e+05 ; C32 - H15  
 45 46 1 1.3497e-01 2.9865e+05 ; C33 - F3  
 45 47 1 1.3497e-01 2.9865e+05 ; C33 - F4  
 45 48 1 1.3497e-01 2.9865e+05 ; C33 - F5  
 49 50 1 1.3497e-01 2.9865e+05 ; C34 - F6  
 49 51 1 1.3497e-01 2.9865e+05 ; C34 - F7  
 49 52 1 1.3497e-01 2.9865e+05 ; C34 - F8  
 53 54 1 1.3497e-01 2.9865e+05 ; C35 - F9  
 53 55 1 1.3497e-01 2.9865e+05 ; C35 - F10  
 53 56 1 1.3497e-01 2.9865e+05 ; C35 - F11  
 57 58 1 1.3497e-01 2.9865e+05 ; C36 - F12  
 57 59 1 1.3497e-01 2.9865e+05 ; C36 - F13  
 57 60 1 1.3497e-01 2.9865e+05 ; C36 - F14

[ pairs ]

; ai aj funct

1 6 1; P - C  
 1 8 1; P - C2  
 1 16 1; P - C10  
 1 18 1; P - C12  
 1 29 1; P - O3  
 1 30 1; P - O4  
 1 31 1; P - C22

<sup>a</sup> Institut für Organische Chemie, Universität Regensburg, D-93053 Regensburg, Germany. E-mail: ruth.gschwind@chemie.uni-regensburg.de

<sup>b</sup> Institute of Physical and Theoretical Chemistry, University of Regensburg, D-93053, Germany

2 7 1; O - C1  
2 17 1; O - C11  
2 28 1; O - S  
3 7 1; N - C1  
3 17 1; N - C11  
3 32 1; N - F  
3 33 1; N - F1  
3 34 1; N - F2  
4 9 1; O1 - C3  
4 15 1; O1 - C9  
4 16 1; O1 - C10  
4 17 1; O1 - C11  
4 27 1; O1 - C21  
4 28 1; O1 - S  
5 6 1; O2 - C  
5 7 1; O2 - C1  
5 19 1; O2 - C13  
5 25 1; O2 - C19  
5 26 1; O2 - C20  
5 28 1; O2 - S  
6 9 1; C - C3  
6 11 1; C - C5  
6 13 1; C - C7  
6 18 1; C - C12  
6 20 1; C - C14  
6 24 1; C - C18  
6 27 1; C - C21  
6 65 1; C - H4  
7 10 1; C1 - C4  
7 14 1; C1 - C8

---

<sup>a</sup> Institut für Organische Chemie, Universität Regensburg, D-93053 Regensburg, Germany. E-mail: ruth.gschwind@chemie.uni-regensburg.de

<sup>b</sup> Institute of Physical and Theoretical Chemistry, University of Regensburg, D-93053, Germany

7 17 1; C1 - C11  
7 25 1; C1 - C19  
7 35 1; C1 - C23  
7 39 1; C1 - C27  
7 61 1; C1 - H  
8 11 1; C2 - C5  
8 15 1; C2 - C9  
8 16 1; C2 - C10  
8 36 1; C2 - C24  
8 38 1; C2 - C26  
8 71 1; C2 - H10  
8 73 1; C2 - H12  
9 12 1; C3 - C6  
9 14 1; C3 - C8  
9 35 1; C3 - C23  
9 39 1; C3 - C27  
9 62 1; C3 - H1  
10 13 1; C4 - C7  
10 16 1; C4 - C10  
10 27 1; C4 - C21  
10 63 1; C4 - H2  
10 65 1; C4 - H4  
11 14 1; C5 - C8  
11 61 1; C5 - H  
11 64 1; C5 - H3  
12 15 1; C6 - C9  
12 65 1; C6 - H4  
13 62 1; C7 - H1  
14 16 1; C8 - C10  
14 63 1; C8 - H2

---

<sup>a</sup> Institut für Organische Chemie, Universität Regensburg, D-93053 Regensburg, Germany. E-mail: ruth.gschwind@chemie.uni-regensburg.de

<sup>b</sup> Institute of Physical and Theoretical Chemistry, University of Regensburg, D-93053, Germany



15 17 1; C9 - C11  
15 25 1; C9 - C19  
15 61 1; C9 - H  
15 62 1; C9 - H1  
15 64 1; C9 - H3  
16 19 1; C10 - C13  
16 21 1; C10 - C15  
16 23 1; C10 - C17  
16 26 1; C10 - C20  
16 70 1; C10 - H9  
17 20 1; C11 - C14  
17 24 1; C11 - C18  
17 40 1; C11 - C28  
17 44 1; C11 - C32  
17 66 1; C11 - H5  
18 21 1; C12 - C15  
18 25 1; C12 - C19  
18 41 1; C12 - C29  
18 43 1; C12 - C31  
18 74 1; C12 - H13  
18 76 1; C12 - H15  
19 22 1; C13 - C16  
19 24 1; C13 - C18  
19 40 1; C13 - C28  
19 44 1; C13 - C32  
19 67 1; C13 - H6  
20 23 1; C14 - C17  
20 26 1; C14 - C20  
20 68 1; C14 - H7  
20 70 1; C14 - H9

---

<sup>a</sup> Institut für Organische Chemie, Universität Regensburg, D-93053 Regensburg, Germany. E-mail: ruth.gschwind@chemie.uni-regensburg.de

<sup>b</sup> Institute of Physical and Theoretical Chemistry, University of Regensburg, D-93053, Germany

21 24 1; C15 - C18  
21 66 1; C15 - H5  
21 69 1; C15 - H8  
22 25 1; C16 - C19  
22 70 1; C16 - H9  
23 67 1; C17 - H6  
24 68 1; C18 - H7  
25 66 1; C19 - H5  
25 67 1; C19 - H6  
25 69 1; C19 - H8  
26 42 1; C20 - C30  
26 53 1; C20 - C35  
26 57 1; C20 - C36  
26 66 1; C20 - H5  
27 37 1; C21 - C25  
27 45 1; C21 - C33  
27 49 1; C21 - C34  
27 61 1; C21 - H  
29 32 1; O3 - F  
29 33 1; O3 - F1  
29 34 1; O3 - F2  
30 32 1; O4 - F  
30 33 1; O4 - F1  
30 34 1; O4 - F2  
35 38 1; C23 - C26  
35 50 1; C23 - F6  
35 51 1; C23 - F7  
35 52 1; C23 - F8  
35 72 1; C23 - H11  
35 73 1; C23 - H12

---

<sup>a</sup> Institut für Organische Chemie, Universität Regensburg, D-93053 Regensburg, Germany. E-mail: ruth.gschwind@chemie.uni-regensburg.de

<sup>b</sup> Institute of Physical and Theoretical Chemistry, University of Regensburg, D-93053, Germany

36 39 1; C24 - C27  
36 45 1; C24 - C33  
37 46 1; C25 - F3  
37 47 1; C25 - F4  
37 48 1; C25 - F5  
37 50 1; C25 - F6  
37 51 1; C25 - F7  
37 52 1; C25 - F8  
37 71 1; C25 - H10  
37 73 1; C25 - H12  
38 49 1; C26 - C34  
39 46 1; C27 - F3  
39 47 1; C27 - F4  
39 48 1; C27 - F5  
39 71 1; C27 - H10  
39 72 1; C27 - H11  
40 43 1; C28 - C31  
40 58 1; C28 - F12  
40 59 1; C28 - F13  
40 60 1; C28 - F14  
40 75 1; C28 - H14  
40 76 1; C28 - H15  
41 44 1; C29 - C32  
41 53 1; C29 - C35  
42 54 1; C30 - F9  
42 55 1; C30 - F10  
42 56 1; C30 - F11  
42 58 1; C30 - F12  
42 59 1; C30 - F13  
42 60 1; C30 - F14

---

<sup>a</sup> Institut für Organische Chemie, Universität Regensburg, D-93053 Regensburg, Germany. E-mail: ruth.gschwind@chemie.uni-regensburg.de

<sup>b</sup> Institute of Physical and Theoretical Chemistry, University of Regensburg, D-93053, Germany

42 74 1; C30 - H13  
 42 76 1; C30 - H15  
 43 57 1; C31 - C36  
 44 54 1; C32 - F9  
 44 55 1; C32 - F10  
 44 56 1; C32 - F11  
 44 74 1; C32 - H13  
 44 75 1; C32 - H14  
 45 72 1; C33 - H11  
 45 73 1; C33 - H12  
 49 71 1; C34 - H10  
 49 72 1; C34 - H11  
 53 75 1; C35 - H14  
 53 76 1; C35 - H15  
 57 74 1; C36 - H13  
 57 75 1; C36 - H14  
 62 63 1; H1 - H2  
 63 64 1; H2 - H3  
 64 65 1; H3 - H4  
 67 68 1; H6 - H7  
 68 69 1; H7 - H8  
 69 70 1; H8 - H9

[ angles ]

|  | ai | aj | ak | funct | theta      | cth         |        |       |
|--|----|----|----|-------|------------|-------------|--------|-------|
|  | 1  | 3  | 28 | 1     | 1.3184e+02 | 6.5689e+02; | P - N  | - S   |
|  | 1  | 4  | 7  | 1     | 1.2318e+02 | 6.5019e+02; | P - O1 | - C1  |
|  | 1  | 5  | 17 | 1     | 1.2318e+02 | 6.5019e+02; | P - O2 | - C11 |
|  | 2  | 1  | 3  | 1     | 1.1353e+02 | 3.6987e+02; | O - P  | - N   |
|  | 2  | 1  | 4  | 1     | 1.1546e+02 | 3.6736e+02; | O - P  | - O1  |

<sup>a</sup> Institut für Organische Chemie, Universität Regensburg, D-93053 Regensburg, Germany. E-mail: ruth.gschwind@chemie.uni-regensburg.de

<sup>b</sup> Institute of Physical and Theoretical Chemistry, University of Regensburg, D-93053, Germany

|    |    |    |   |            |             |          |       |
|----|----|----|---|------------|-------------|----------|-------|
| 2  | 1  | 5  | 1 | 1.1546e+02 | 3.6736e+02; | O - P    | - O2  |
| 3  | 1  | 4  | 1 | 1.0240e+02 | 3.7489e+02; | N - P    | - O1  |
| 3  | 1  | 5  | 1 | 1.0240e+02 | 3.7489e+02; | N - P    | - O2  |
| 3  | 28 | 29 | 1 | 1.0965e+02 | 5.8827e+02; | N - S    | - O3  |
| 3  | 28 | 30 | 1 | 1.0965e+02 | 5.8827e+02; | N - S    | - O4  |
| 3  | 28 | 31 | 1 | 1.0219e+02 | 5.3639e+02; | N - S    | - C22 |
| 4  | 1  | 5  | 1 | 1.0184e+02 | 3.7656e+02; | O1 - P   | - O2  |
| 4  | 7  | 6  | 1 | 1.1691e+02 | 5.8660e+02; | O1 - C1  | - C   |
| 4  | 7  | 8  | 1 | 1.1691e+02 | 5.8660e+02; | O1 - C1  | - C2  |
| 5  | 17 | 16 | 1 | 1.1691e+02 | 5.8660e+02; | O2 - C11 | - C10 |
| 5  | 17 | 18 | 1 | 1.1691e+02 | 5.8660e+02; | O2 - C11 | - C12 |
| 6  | 7  | 8  | 1 | 1.1152e+02 | 5.7572e+02; | C - C1   | - C2  |
| 6  | 15 | 10 | 1 | 1.2069e+02 | 5.5480e+02; | C - C9   | - C4  |
| 6  | 15 | 14 | 1 | 1.2069e+02 | 5.5480e+02; | C - C9   | - C8  |
| 6  | 16 | 17 | 1 | 1.2111e+02 | 5.3555e+02; | C - C10  | - C11 |
| 6  | 16 | 25 | 1 | 1.2111e+02 | 5.3555e+02; | C - C10  | - C19 |
| 7  | 6  | 15 | 1 | 1.1838e+02 | 5.5815e+02; | C1 - C   | - C9  |
| 7  | 6  | 16 | 1 | 1.2111e+02 | 5.3555e+02; | C1 - C   | - C10 |
| 7  | 8  | 9  | 1 | 1.1838e+02 | 5.5815e+02; | C1 - C2  | - C3  |
| 7  | 8  | 27 | 1 | 1.2111e+02 | 5.3555e+02; | C1 - C2  | - C21 |
| 8  | 9  | 10 | 1 | 1.2069e+02 | 5.5480e+02; | C2 - C3  | - C4  |
| 8  | 9  | 61 | 1 | 1.1986e+02 | 4.0166e+02; | C2 - C3  | - H   |
| 8  | 27 | 35 | 1 | 1.2111e+02 | 5.3555e+02; | C2 - C21 | - C23 |
| 8  | 27 | 39 | 1 | 1.2111e+02 | 5.3555e+02; | C2 - C21 | - C27 |
| 9  | 8  | 27 | 1 | 1.2111e+02 | 5.3555e+02; | C3 - C2  | - C21 |
| 9  | 10 | 11 | 1 | 1.2002e+02 | 5.5731e+02; | C3 - C4  | - C5  |
| 9  | 10 | 15 | 1 | 1.2002e+02 | 5.5731e+02; | C3 - C4  | - C9  |
| 10 | 9  | 61 | 1 | 1.1988e+02 | 4.0334e+02; | C4 - C3  | - H   |
| 10 | 11 | 12 | 1 | 1.2002e+02 | 5.5731e+02; | C4 - C5  | - C6  |
| 10 | 11 | 62 | 1 | 1.1988e+02 | 4.0334e+02; | C4 - C5  | - H1  |

<sup>a</sup> Institut für Organische Chemie, Universität Regensburg, D-93053 Regensburg, Germany. E-mail: ruth.gschwind@chemie.uni-regensburg.de

<sup>b</sup> Institute of Physical and Theoretical Chemistry, University of Regensburg, D-93053, Germany

|    |    |    |   |            |             |           |       |
|----|----|----|---|------------|-------------|-----------|-------|
| 10 | 15 | 14 | 1 | 1.2002e+02 | 5.5731e+02; | C4 - C9   | - C8  |
| 11 | 10 | 15 | 1 | 1.2002e+02 | 5.5731e+02; | C5 - C4   | - C9  |
| 11 | 12 | 13 | 1 | 1.2002e+02 | 5.5731e+02; | C5 - C6   | - C7  |
| 11 | 12 | 63 | 1 | 1.1988e+02 | 4.0334e+02; | C5 - C6   | - H2  |
| 12 | 11 | 62 | 1 | 1.1988e+02 | 4.0334e+02; | C6 - C5   | - H1  |
| 12 | 13 | 14 | 1 | 1.2002e+02 | 5.5731e+02; | C6 - C7   | - C8  |
| 12 | 13 | 64 | 1 | 1.1988e+02 | 4.0334e+02; | C6 - C7   | - H3  |
| 13 | 12 | 63 | 1 | 1.1988e+02 | 4.0334e+02; | C7 - C6   | - H2  |
| 13 | 14 | 15 | 1 | 1.2002e+02 | 5.5731e+02; | C7 - C8   | - C9  |
| 13 | 14 | 65 | 1 | 1.1988e+02 | 4.0334e+02; | C7 - C8   | - H4  |
| 14 | 13 | 64 | 1 | 1.1988e+02 | 4.0334e+02; | C8 - C7   | - H3  |
| 15 | 6  | 16 | 1 | 1.2111e+02 | 5.3555e+02; | C9 - C    | - C10 |
| 15 | 14 | 65 | 1 | 1.1988e+02 | 4.0334e+02; | C9 - C8   | - H4  |
| 16 | 17 | 18 | 1 | 1.1152e+02 | 5.7572e+02; | C10 - C11 | - C12 |
| 16 | 25 | 20 | 1 | 1.2069e+02 | 5.5480e+02; | C10 - C19 | - C14 |
| 16 | 25 | 24 | 1 | 1.2069e+02 | 5.5480e+02; | C10 - C19 | - C18 |
| 17 | 16 | 25 | 1 | 1.1838e+02 | 5.5815e+02; | C11 - C10 | - C19 |
| 17 | 18 | 19 | 1 | 1.1838e+02 | 5.5815e+02; | C11 - C12 | - C13 |
| 17 | 18 | 26 | 1 | 1.2111e+02 | 5.3555e+02; | C11 - C12 | - C20 |
| 18 | 19 | 20 | 1 | 1.2069e+02 | 5.5480e+02; | C12 - C13 | - C14 |
| 18 | 19 | 66 | 1 | 1.1986e+02 | 4.0166e+02; | C12 - C13 | - H5  |
| 18 | 26 | 40 | 1 | 1.2111e+02 | 5.3555e+02; | C12 - C20 | - C28 |
| 18 | 26 | 44 | 1 | 1.2111e+02 | 5.3555e+02; | C12 - C20 | - C32 |
| 19 | 18 | 26 | 1 | 1.2111e+02 | 5.3555e+02; | C13 - C12 | - C20 |
| 19 | 20 | 21 | 1 | 1.2002e+02 | 5.5731e+02; | C13 - C14 | - C15 |
| 19 | 20 | 25 | 1 | 1.2002e+02 | 5.5731e+02; | C13 - C14 | - C19 |
| 20 | 19 | 66 | 1 | 1.1988e+02 | 4.0334e+02; | C14 - C13 | - H5  |
| 20 | 21 | 22 | 1 | 1.2002e+02 | 5.5731e+02; | C14 - C15 | - C16 |
| 20 | 21 | 67 | 1 | 1.1988e+02 | 4.0334e+02; | C14 - C15 | - H6  |
| 20 | 25 | 24 | 1 | 1.2002e+02 | 5.5731e+02; | C14 - C19 | - C18 |

<sup>a</sup> Institut für Organische Chemie, Universität Regensburg, D-93053 Regensburg, Germany. E-mail: ruth.gschwind@chemie.uni-regensburg.de

<sup>b</sup> Institute of Physical and Theoretical Chemistry, University of Regensburg, D-93053, Germany

|    |    |    |   |            |            |                   |
|----|----|----|---|------------|------------|-------------------|
| 21 | 20 | 25 | 1 | 1.2002e+02 | 5.5731e+02 | ; C15 - C14 - C19 |
| 21 | 22 | 23 | 1 | 1.2002e+02 | 5.5731e+02 | ; C15 - C16 - C17 |
| 21 | 22 | 68 | 1 | 1.1988e+02 | 4.0334e+02 | ; C15 - C16 - H7  |
| 22 | 21 | 67 | 1 | 1.1988e+02 | 4.0334e+02 | ; C16 - C15 - H6  |
| 22 | 23 | 24 | 1 | 1.2002e+02 | 5.5731e+02 | ; C16 - C17 - C18 |
| 22 | 23 | 69 | 1 | 1.1988e+02 | 4.0334e+02 | ; C16 - C17 - H8  |
| 23 | 22 | 68 | 1 | 1.1988e+02 | 4.0334e+02 | ; C17 - C16 - H7  |
| 23 | 24 | 25 | 1 | 1.2002e+02 | 5.5731e+02 | ; C17 - C18 - C19 |
| 23 | 24 | 70 | 1 | 1.1988e+02 | 4.0334e+02 | ; C17 - C18 - H9  |
| 24 | 23 | 69 | 1 | 1.1988e+02 | 4.0334e+02 | ; C18 - C17 - H8  |
| 25 | 24 | 70 | 1 | 1.1988e+02 | 4.0334e+02 | ; C19 - C18 - H9  |
| 26 | 40 | 41 | 1 | 1.2069e+02 | 5.5480e+02 | ; C20 - C28 - C29 |
| 26 | 40 | 74 | 1 | 1.1986e+02 | 4.0166e+02 | ; C20 - C28 - H13 |
| 26 | 44 | 43 | 1 | 1.2069e+02 | 5.5480e+02 | ; C20 - C32 - C31 |
| 26 | 44 | 76 | 1 | 1.1986e+02 | 4.0166e+02 | ; C20 - C32 - H15 |
| 27 | 35 | 36 | 1 | 1.2069e+02 | 5.5480e+02 | ; C21 - C23 - C24 |
| 27 | 35 | 71 | 1 | 1.1986e+02 | 4.0166e+02 | ; C21 - C23 - H10 |
| 27 | 39 | 38 | 1 | 1.2069e+02 | 5.5480e+02 | ; C21 - C27 - C26 |
| 27 | 39 | 73 | 1 | 1.1986e+02 | 4.0166e+02 | ; C21 - C27 - H12 |
| 28 | 31 | 32 | 1 | 1.0968e+02 | 5.2802e+02 | ; S - C22 - F     |
| 28 | 31 | 33 | 1 | 1.0968e+02 | 5.2802e+02 | ; S - C22 - F1    |
| 28 | 31 | 34 | 1 | 1.0968e+02 | 5.2802e+02 | ; S - C22 - F2    |
| 29 | 28 | 30 | 1 | 1.2141e+02 | 6.0668e+02 | ; O3 - S - O4     |
| 29 | 28 | 31 | 1 | 1.0785e+02 | 5.4727e+02 | ; O3 - S - C22    |
| 30 | 28 | 31 | 1 | 1.0785e+02 | 5.4727e+02 | ; O4 - S - C22    |
| 32 | 31 | 33 | 1 | 1.0736e+02 | 5.9329e+02 | ; F - C22 - F1    |
| 32 | 31 | 34 | 1 | 1.0736e+02 | 5.9329e+02 | ; F - C22 - F2    |
| 33 | 31 | 34 | 1 | 1.0736e+02 | 5.9329e+02 | ; F1 - C22 - F2   |
| 35 | 27 | 39 | 1 | 1.1838e+02 | 5.5815e+02 | ; C23 - C21 - C27 |
| 35 | 36 | 37 | 1 | 1.2002e+02 | 5.5731e+02 | ; C23 - C24 - C25 |

<sup>a</sup> Institut für Organische Chemie, Universität Regensburg, D-93053 Regensburg, Germany. E-mail: ruth.gschwind@chemie.uni-regensburg.de

<sup>b</sup> Institute of Physical and Theoretical Chemistry, University of Regensburg, D-93053, Germany

|    |    |    |   |            |            |             |       |
|----|----|----|---|------------|------------|-------------|-------|
| 35 | 36 | 49 | 1 | 1.2077e+02 | 5.3137e+02 | ; C23 - C24 | - C34 |
| 36 | 35 | 71 | 1 | 1.1988e+02 | 4.0334e+02 | ; C24 - C23 | - H10 |
| 36 | 37 | 38 | 1 | 1.2002e+02 | 5.5731e+02 | ; C24 - C25 | - C26 |
| 36 | 37 | 72 | 1 | 1.1988e+02 | 4.0334e+02 | ; C24 - C25 | - H11 |
| 36 | 49 | 50 | 1 | 1.1177e+02 | 5.5229e+02 | ; C24 - C34 | - F6  |
| 36 | 49 | 51 | 1 | 1.1177e+02 | 5.5229e+02 | ; C24 - C34 | - F7  |
| 36 | 49 | 52 | 1 | 1.1177e+02 | 5.5229e+02 | ; C24 - C34 | - F8  |
| 37 | 36 | 49 | 1 | 1.2077e+02 | 5.3137e+02 | ; C25 - C24 | - C34 |
| 37 | 38 | 39 | 1 | 1.2002e+02 | 5.5731e+02 | ; C25 - C26 | - C27 |
| 37 | 38 | 45 | 1 | 1.2077e+02 | 5.3137e+02 | ; C25 - C26 | - C33 |
| 38 | 37 | 72 | 1 | 1.1988e+02 | 4.0334e+02 | ; C26 - C25 | - H11 |
| 38 | 39 | 73 | 1 | 1.1988e+02 | 4.0334e+02 | ; C26 - C27 | - H12 |
| 38 | 45 | 46 | 1 | 1.1177e+02 | 5.5229e+02 | ; C26 - C33 | - F3  |
| 38 | 45 | 47 | 1 | 1.1177e+02 | 5.5229e+02 | ; C26 - C33 | - F4  |
| 38 | 45 | 48 | 1 | 1.1177e+02 | 5.5229e+02 | ; C26 - C33 | - F5  |
| 39 | 38 | 45 | 1 | 1.2077e+02 | 5.3137e+02 | ; C27 - C26 | - C33 |
| 40 | 26 | 44 | 1 | 1.1838e+02 | 5.5815e+02 | ; C28 - C20 | - C32 |
| 40 | 41 | 42 | 1 | 1.2002e+02 | 5.5731e+02 | ; C28 - C29 | - C30 |
| 40 | 41 | 57 | 1 | 1.2077e+02 | 5.3137e+02 | ; C28 - C29 | - C36 |
| 41 | 40 | 74 | 1 | 1.1988e+02 | 4.0334e+02 | ; C29 - C28 | - H13 |
| 41 | 42 | 43 | 1 | 1.2002e+02 | 5.5731e+02 | ; C29 - C30 | - C31 |
| 41 | 42 | 75 | 1 | 1.1988e+02 | 4.0334e+02 | ; C29 - C30 | - H14 |
| 41 | 57 | 58 | 1 | 1.1177e+02 | 5.5229e+02 | ; C29 - C36 | - F12 |
| 41 | 57 | 59 | 1 | 1.1177e+02 | 5.5229e+02 | ; C29 - C36 | - F13 |
| 41 | 57 | 60 | 1 | 1.1177e+02 | 5.5229e+02 | ; C29 - C36 | - F14 |
| 42 | 41 | 57 | 1 | 1.2077e+02 | 5.3137e+02 | ; C30 - C29 | - C36 |
| 42 | 43 | 44 | 1 | 1.2002e+02 | 5.5731e+02 | ; C30 - C31 | - C32 |
| 42 | 43 | 53 | 1 | 1.2077e+02 | 5.3137e+02 | ; C30 - C31 | - C35 |
| 43 | 42 | 75 | 1 | 1.1988e+02 | 4.0334e+02 | ; C31 - C30 | - H14 |
| 43 | 44 | 76 | 1 | 1.1988e+02 | 4.0334e+02 | ; C31 - C32 | - H15 |

<sup>a</sup> Institut für Organische Chemie, Universität Regensburg, D-93053 Regensburg, Germany. E-mail: ruth.gschwind@chemie.uni-regensburg.de

<sup>b</sup> Institute of Physical and Theoretical Chemistry, University of Regensburg, D-93053, Germany



43 53 54 1 1.1177e+02 5.5229e+02; C31 - C35 - F9  
 43 53 55 1 1.1177e+02 5.5229e+02; C31 - C35 - F10  
 43 53 56 1 1.1177e+02 5.5229e+02; C31 - C35 - F11  
 44 43 53 1 1.2077e+02 5.3137e+02; C32 - C31 - C35  
 46 45 47 1 1.0736e+02 5.9329e+02; F3 - C33 - F4  
 46 45 48 1 1.0736e+02 5.9329e+02; F3 - C33 - F5  
 47 45 48 1 1.0736e+02 5.9329e+02; F4 - C33 - F5  
 50 49 51 1 1.0736e+02 5.9329e+02; F6 - C34 - F7  
 50 49 52 1 1.0736e+02 5.9329e+02; F6 - C34 - F8  
 51 49 52 1 1.0736e+02 5.9329e+02; F7 - C34 - F8  
 54 53 55 1 1.0736e+02 5.9329e+02; F9 - C35 - F10  
 54 53 56 1 1.0736e+02 5.9329e+02; F9 - C35 - F11  
 55 53 56 1 1.0736e+02 5.9329e+02; F10 - C35 - F11  
 58 57 59 1 1.0736e+02 5.9329e+02; F12 - C36 - F13  
 58 57 60 1 1.0736e+02 5.9329e+02; F12 - C36 - F14  
 59 57 60 1 1.0736e+02 5.9329e+02; F13 - C36 - F14

[ dihedrals ]; propers

; for gromacs 4.5 or higher, using funct 9

; i j k l func phase kd pn

1 3 28 29 9 180.00 2.09200 3; P- N- S- O3  
 1 3 28 29 9 180.00 28.45120 1; P- N- S- O3  
 1 3 28 30 9 180.00 2.09200 3; P- N- S- O4  
 1 3 28 30 9 180.00 28.45120 1; P- N- S- O4  
 1 3 28 31 9 180.00 2.09200 3; P- N- S- C22  
 1 3 28 31 9 180.00 28.45120 1; P- N- S- C22  
 1 4 7 6 9 180.00 3.76560 2; P- O1- C1- C  
 1 4 7 8 9 180.00 3.76560 2; P- O1- C1- C2  
 1 5 17 16 9 180.00 3.76560 2; P- O2- C11- C10  
 1 5 17 18 9 180.00 3.76560 2; P- O2- C11- C12

<sup>a</sup> Institut für Organische Chemie, Universität Regensburg, D-93053 Regensburg, Germany. E-mail: ruth.gschwind@chemie.uni-regensburg.de

<sup>b</sup> Institute of Physical and Theoretical Chemistry, University of Regensburg, D-93053, Germany

2 1 3 28 9 180.00 4.18400 3; O- P- N- S  
 2 1 4 7 9 0.00 0.41840 3; O- P- O1- C1  
 2 1 4 7 9 180.00 3.34720 2; O- P- O1- C1  
 2 1 5 17 9 0.00 0.41840 3; O- P- O2- C11  
 2 1 5 17 9 180.00 3.34720 2; O- P- O2- C11  
 3 1 4 7 9 0.00 3.34720 2; N- P- O1- C1  
 3 1 5 17 9 0.00 3.34720 2; N- P- O2- C11  
 3 28 31 32 9 0.00 0.60436 3; N- S- C22- F  
 3 28 31 33 9 0.00 0.60436 3; N- S- C22- F1  
 3 28 31 34 9 0.00 0.60436 3; N- S- C22- F2  
 4 1 3 28 9 180.00 4.18400 3; O1- P- N- S  
 4 1 5 17 9 0.00 3.34720 2; O1- P- O2- C11  
 4 7 6 15 9 180.00 15.16700 2; O1- C1- C- C9  
 4 7 6 16 9 180.00 15.16700 2; O1- C1- C- C10  
 4 7 8 9 9 180.00 15.16700 2; O1- C1- C2- C3  
 4 7 8 27 9 180.00 15.16700 2; O1- C1- C2- C21  
 5 1 3 28 9 180.00 4.18400 3; O2- P- N- S  
 5 1 4 7 9 0.00 3.34720 2; O2- P- O1- C1  
 5 17 16 6 9 180.00 15.16700 2; O2- C11- C10- C  
 5 17 16 25 9 180.00 15.16700 2; O2- C11- C10- C19  
 5 17 18 19 9 180.00 15.16700 2; O2- C11- C12- C13  
 5 17 18 26 9 180.00 15.16700 2; O2- C11- C12- C20  
 6 7 8 9 9 180.00 15.16700 2; C- C1- C2- C3  
 6 7 8 27 9 180.00 15.16700 2; C- C1- C2- C21  
 6 15 10 9 9 180.00 15.16700 2; C- C9- C4- C3  
 6 15 10 11 9 180.00 15.16700 2; C- C9- C4- C5  
 6 15 14 13 9 180.00 15.16700 2; C- C9- C8- C7  
 6 15 14 65 9 180.00 15.16700 2; C- C9- C8- H4  
 6 16 17 18 9 180.00 15.16700 2; C- C10- C11- C12  
 6 16 25 20 9 180.00 15.16700 2; C- C10- C19- C14

<sup>a</sup> Institut für Organische Chemie, Universität Regensburg, D-93053 Regensburg, Germany. E-mail: ruth.gschwind@chemie.uni-regensburg.de

<sup>b</sup> Institute of Physical and Theoretical Chemistry, University of Regensburg, D-93053, Germany

6 16 25 24 9 180.00 15.16700 2; C- C10- C19- C18  
 7 6 15 10 9 180.00 15.16700 2; C1- C- C9- C4  
 7 6 15 14 9 180.00 15.16700 2; C1- C- C9- C8  
 7 6 16 17 9 180.00 4.18400 2; C1- C- C10- C11  
 7 6 16 25 9 180.00 4.18400 2; C1- C- C10- C19  
 7 8 9 10 9 180.00 15.16700 2; C1- C2- C3- C4  
 7 8 9 61 9 180.00 15.16700 2; C1- C2- C3- H  
 7 8 27 35 9 180.00 4.18400 2; C1- C2- C21- C23  
 7 8 27 39 9 180.00 4.18400 2; C1- C2- C21- C27  
 8 7 6 15 9 180.00 15.16700 2; C2- C1- C- C9  
 8 7 6 16 9 180.00 15.16700 2; C2- C1- C- C10  
 8 9 10 11 9 180.00 15.16700 2; C2- C3- C4- C5  
 8 9 10 15 9 180.00 15.16700 2; C2- C3- C4- C9  
 8 27 35 36 9 180.00 15.16700 2; C2- C21- C23- C24  
 8 27 35 71 9 180.00 15.16700 2; C2- C21- C23- H10  
 8 27 39 38 9 180.00 15.16700 2; C2- C21- C27- C26  
 8 27 39 73 9 180.00 15.16700 2; C2- C21- C27- H12  
 9 8 27 35 9 180.00 4.18400 2; C3- C2- C21- C23  
 9 8 27 39 9 180.00 4.18400 2; C3- C2- C21- C27  
 9 10 11 12 9 180.00 15.16700 2; C3- C4- C5- C6  
 9 10 11 62 9 180.00 15.16700 2; C3- C4- C5- H1  
 9 10 15 14 9 180.00 15.16700 2; C3- C4- C9- C8  
 10 9 8 27 9 180.00 15.16700 2; C4- C3- C2- C21  
 10 11 12 13 9 180.00 15.16700 2; C4- C5- C6- C7  
 10 11 12 63 9 180.00 15.16700 2; C4- C5- C6- H2  
 10 15 6 16 9 180.00 15.16700 2; C4- C9- C- C10  
 10 15 14 13 9 180.00 15.16700 2; C4- C9- C8- C7  
 10 15 14 65 9 180.00 15.16700 2; C4- C9- C8- H4  
 11 10 9 61 9 180.00 15.16700 2; C5- C4- C3- H  
 11 10 15 14 9 180.00 15.16700 2; C5- C4- C9- C8

<sup>a</sup> Institut für Organische Chemie, Universität Regensburg, D-93053 Regensburg, Germany. E-mail: ruth.gschwind@chemie.uni-regensburg.de

<sup>b</sup> Institute of Physical and Theoretical Chemistry, University of Regensburg, D-93053, Germany

11 12 13 14 9 180.00 15.16700 2; C5- C6- C7- C8  
 11 12 13 64 9 180.00 15.16700 2; C5- C6- C7- H3  
 12 11 10 15 9 180.00 15.16700 2; C6- C5- C4- C9  
 12 13 14 15 9 180.00 15.16700 2; C6- C7- C8- C9  
 12 13 14 65 9 180.00 15.16700 2; C6- C7- C8- H4  
 13 12 11 62 9 180.00 15.16700 2; C7- C6- C5- H1  
 14 13 12 63 9 180.00 15.16700 2; C8- C7- C6- H2  
 14 15 6 16 9 180.00 15.16700 2; C8- C9- C- C10  
 15 6 16 17 9 180.00 4.18400 2; C9- C- C10- C11  
 15 6 16 25 9 180.00 4.18400 2; C9- C- C10- C19  
 15 10 9 61 9 180.00 15.16700 2; C9- C4- C3- H  
 15 10 11 62 9 180.00 15.16700 2; C9- C4- C5- H1  
 15 14 13 64 9 180.00 15.16700 2; C9- C8- C7- H3  
 16 17 18 19 9 180.00 15.16700 2; C10- C11- C12- C13  
 16 17 18 26 9 180.00 15.16700 2; C10- C11- C12- C20  
 16 25 20 19 9 180.00 15.16700 2; C10- C19- C14- C13  
 16 25 20 21 9 180.00 15.16700 2; C10- C19- C14- C15  
 16 25 24 23 9 180.00 15.16700 2; C10- C19- C18- C17  
 16 25 24 70 9 180.00 15.16700 2; C10- C19- C18- H9  
 17 16 25 20 9 180.00 15.16700 2; C11- C10- C19- C14  
 17 16 25 24 9 180.00 15.16700 2; C11- C10- C19- C18  
 17 18 19 20 9 180.00 15.16700 2; C11- C12- C13- C14  
 17 18 19 66 9 180.00 15.16700 2; C11- C12- C13- H5  
 17 18 26 40 9 180.00 4.18400 2; C11- C12- C20- C28  
 17 18 26 44 9 180.00 4.18400 2; C11- C12- C20- C32  
 18 17 16 25 9 180.00 15.16700 2; C12- C11- C10- C19  
 18 19 20 21 9 180.00 15.16700 2; C12- C13- C14- C15  
 18 19 20 25 9 180.00 15.16700 2; C12- C13- C14- C19  
 18 26 40 41 9 180.00 15.16700 2; C12- C20- C28- C29  
 18 26 40 74 9 180.00 15.16700 2; C12- C20- C28- H13

<sup>a</sup> Institut für Organische Chemie, Universität Regensburg, D-93053 Regensburg, Germany. E-mail: ruth.gschwind@chemie.uni-regensburg.de

<sup>b</sup> Institute of Physical and Theoretical Chemistry, University of Regensburg, D-93053, Germany

18 26 44 43 9 180.00 15.16700 2; C12- C20- C32- C31  
 18 26 44 76 9 180.00 15.16700 2; C12- C20- C32- H15  
 19 18 26 40 9 180.00 4.18400 2; C13- C12- C20- C28  
 19 18 26 44 9 180.00 4.18400 2; C13- C12- C20- C32  
 19 20 21 22 9 180.00 15.16700 2; C13- C14- C15- C16  
 19 20 21 67 9 180.00 15.16700 2; C13- C14- C15- H6  
 19 20 25 24 9 180.00 15.16700 2; C13- C14- C19- C18  
 20 19 18 26 9 180.00 15.16700 2; C14- C13- C12- C20  
 20 21 22 23 9 180.00 15.16700 2; C14- C15- C16- C17  
 20 21 22 68 9 180.00 15.16700 2; C14- C15- C16- H7  
 20 25 24 23 9 180.00 15.16700 2; C14- C19- C18- C17  
 20 25 24 70 9 180.00 15.16700 2; C14- C19- C18- H9  
 21 20 19 66 9 180.00 15.16700 2; C15- C14- C13- H5  
 21 20 25 24 9 180.00 15.16700 2; C15- C14- C19- C18  
 21 22 23 24 9 180.00 15.16700 2; C15- C16- C17- C18  
 21 22 23 69 9 180.00 15.16700 2; C15- C16- C17- H8  
 22 21 20 25 9 180.00 15.16700 2; C16- C15- C14- C19  
 22 23 24 25 9 180.00 15.16700 2; C16- C17- C18- C19  
 22 23 24 70 9 180.00 15.16700 2; C16- C17- C18- H9  
 23 22 21 67 9 180.00 15.16700 2; C17- C16- C15- H6  
 24 23 22 68 9 180.00 15.16700 2; C18- C17- C16- H7  
 25 20 19 66 9 180.00 15.16700 2; C19- C14- C13- H5  
 25 20 21 67 9 180.00 15.16700 2; C19- C14- C15- H6  
 25 24 23 69 9 180.00 15.16700 2; C19- C18- C17- H8  
 26 18 19 66 9 180.00 15.16700 2; C20- C12- C13- H5  
 26 40 41 42 9 180.00 15.16700 2; C20- C28- C29- C30  
 26 40 41 57 9 180.00 15.16700 2; C20- C28- C29- C36  
 26 44 43 42 9 180.00 15.16700 2; C20- C32- C31- C30  
 26 44 43 53 9 180.00 15.16700 2; C20- C32- C31- C35  
 27 8 9 61 9 180.00 15.16700 2; C21- C2- C3- H

<sup>a</sup> Institut für Organische Chemie, Universität Regensburg, D-93053 Regensburg, Germany. E-mail: ruth.gschwind@chemie.uni-regensburg.de

<sup>b</sup> Institute of Physical and Theoretical Chemistry, University of Regensburg, D-93053, Germany

27 35 36 37 9 180.00 15.16700 2; C21- C23- C24- C25  
 27 35 36 49 9 180.00 15.16700 2; C21- C23- C24- C34  
 27 39 38 37 9 180.00 15.16700 2; C21- C27- C26- C25  
 27 39 38 45 9 180.00 15.16700 2; C21- C27- C26- C33  
 29 28 31 32 9 0.00 0.60436 3; O3- S- C22- F  
 29 28 31 33 9 0.00 0.60436 3; O3- S- C22- F1  
 29 28 31 34 9 0.00 0.60436 3; O3- S- C22- F2  
 30 28 31 32 9 0.00 0.60436 3; O4- S- C22- F  
 30 28 31 33 9 0.00 0.60436 3; O4- S- C22- F1  
 30 28 31 34 9 0.00 0.60436 3; O4- S- C22- F2  
 35 27 39 38 9 180.00 15.16700 2; C23- C21- C27- C26  
 35 27 39 73 9 180.00 15.16700 2; C23- C21- C27- H12  
 35 36 37 38 9 180.00 15.16700 2; C23- C24- C25- C26  
 35 36 37 72 9 180.00 15.16700 2; C23- C24- C25- H11  
 35 36 49 50 9 0.00 0.00000 0; C23- C24- C34- F6  
 35 36 49 51 9 0.00 0.00000 0; C23- C24- C34- F7  
 35 36 49 52 9 0.00 0.00000 0; C23- C24- C34- F8  
 36 35 27 39 9 180.00 15.16700 2; C24- C23- C21- C27  
 36 37 38 39 9 180.00 15.16700 2; C24- C25- C26- C27  
 36 37 38 45 9 180.00 15.16700 2; C24- C25- C26- C33  
 37 36 35 71 9 180.00 15.16700 2; C25- C24- C23- H10  
 37 36 49 50 9 0.00 0.00000 0; C25- C24- C34- F6  
 37 36 49 51 9 0.00 0.00000 0; C25- C24- C34- F7  
 37 36 49 52 9 0.00 0.00000 0; C25- C24- C34- F8  
 37 38 39 73 9 180.00 15.16700 2; C25- C26- C27- H12  
 37 38 45 46 9 0.00 0.00000 0; C25- C26- C33- F3  
 37 38 45 47 9 0.00 0.00000 0; C25- C26- C33- F4  
 37 38 45 48 9 0.00 0.00000 0; C25- C26- C33- F5  
 38 37 36 49 9 180.00 15.16700 2; C26- C25- C24- C34  
 39 27 35 71 9 180.00 15.16700 2; C27- C21- C23- H10

<sup>a</sup> Institut für Organische Chemie, Universität Regensburg, D-93053 Regensburg, Germany. E-mail: ruth.gschwind@chemie.uni-regensburg.de

<sup>b</sup> Institute of Physical and Theoretical Chemistry, University of Regensburg, D-93053, Germany

39 38 37 72 9 180.00 15.16700 2; C27- C26- C25- H11  
39 38 45 46 9 0.00 0.00000 0; C27- C26- C33- F3  
39 38 45 47 9 0.00 0.00000 0; C27- C26- C33- F4  
39 38 45 48 9 0.00 0.00000 0; C27- C26- C33- F5  
40 26 44 43 9 180.00 15.16700 2; C28- C20- C32- C31  
40 26 44 76 9 180.00 15.16700 2; C28- C20- C32- H15  
40 41 42 43 9 180.00 15.16700 2; C28- C29- C30- C31  
40 41 42 75 9 180.00 15.16700 2; C28- C29- C30- H14  
40 41 57 58 9 0.00 0.00000 0; C28- C29- C36- F12  
40 41 57 59 9 0.00 0.00000 0; C28- C29- C36- F13  
40 41 57 60 9 0.00 0.00000 0; C28- C29- C36- F14  
41 40 26 44 9 180.00 15.16700 2; C29- C28- C20- C32  
41 42 43 44 9 180.00 15.16700 2; C29- C30- C31- C32  
41 42 43 53 9 180.00 15.16700 2; C29- C30- C31- C35  
42 41 40 74 9 180.00 15.16700 2; C30- C29- C28- H13  
42 41 57 58 9 0.00 0.00000 0; C30- C29- C36- F12  
42 41 57 59 9 0.00 0.00000 0; C30- C29- C36- F13  
42 41 57 60 9 0.00 0.00000 0; C30- C29- C36- F14  
42 43 44 76 9 180.00 15.16700 2; C30- C31- C32- H15  
42 43 53 54 9 0.00 0.00000 0; C30- C31- C35- F9  
42 43 53 55 9 0.00 0.00000 0; C30- C31- C35- F10  
42 43 53 56 9 0.00 0.00000 0; C30- C31- C35- F11  
43 42 41 57 9 180.00 15.16700 2; C31- C30- C29- C36  
44 26 40 74 9 180.00 15.16700 2; C32- C20- C28- H13  
44 43 42 75 9 180.00 15.16700 2; C32- C31- C30- H14  
44 43 53 54 9 0.00 0.00000 0; C32- C31- C35- F9  
44 43 53 55 9 0.00 0.00000 0; C32- C31- C35- F10  
44 43 53 56 9 0.00 0.00000 0; C32- C31- C35- F11  
45 38 37 72 9 180.00 15.16700 2; C33- C26- C25- H11  
45 38 39 73 9 180.00 15.16700 2; C33- C26- C27- H12

<sup>a</sup> Institut für Organische Chemie, Universität Regensburg, D-93053 Regensburg, Germany. E-mail: ruth.gschwind@chemie.uni-regensburg.de

<sup>b</sup> Institute of Physical and Theoretical Chemistry, University of Regensburg, D-93053, Germany

49 36 35 71 9 180.00 15.16700 2; C34- C24- C23- H10  
 49 36 37 72 9 180.00 15.16700 2; C34- C24- C25- H11  
 53 43 42 75 9 180.00 15.16700 2; C35- C31- C30- H14  
 53 43 44 76 9 180.00 15.16700 2; C35- C31- C32- H15  
 57 41 40 74 9 180.00 15.16700 2; C36- C29- C28- H13  
 57 41 42 75 9 180.00 15.16700 2; C36- C29- C30- H14  
 62 11 12 63 9 180.00 15.16700 2; H1- C5- C6- H2  
 63 12 13 64 9 180.00 15.16700 2; H2- C6- C7- H3  
 64 13 14 65 9 180.00 15.16700 2; H3- C7- C8- H4  
 67 21 22 68 9 180.00 15.16700 2; H6- C15- C16- H7  
 68 22 23 69 9 180.00 15.16700 2; H7- C16- C17- H8  
 69 23 24 70 9 180.00 15.16700 2; H8- C17- C18- H9

[ dihedrals ] ; impropers

; treated as propers in GROMACS to use correct AMBER analytical function

; i j k l func phase kd pn  
 6 8 7 4 4 180.00 4.60240 2; C- C2- C1- O1  
 7 9 8 27 4 180.00 4.60240 2; C1- C3- C2- C21  
 7 15 6 16 4 180.00 4.60240 2; C1- C9- C- C10  
 9 11 10 15 4 180.00 4.60240 2; C3- C5- C4- C9  
 10 8 9 61 4 180.00 4.60240 2; C4- C2- C3- H  
 10 12 11 62 4 180.00 4.60240 2; C4- C6- C5- H1  
 10 14 15 6 4 180.00 4.60240 2; C4- C8- C9- C  
 11 13 12 63 4 180.00 4.60240 2; C5- C7- C6- H2  
 12 14 13 64 4 180.00 4.60240 2; C6- C8- C7- H3  
 13 15 14 65 4 180.00 4.60240 2; C7- C9- C8- H4  
 16 18 17 5 4 180.00 4.60240 2; C10- C12- C11- O2  
 17 19 18 26 4 180.00 4.60240 2; C11- C13- C12- C20  
 17 25 16 6 4 180.00 4.60240 2; C11- C19- C10- C  
 19 21 20 25 4 180.00 4.60240 2; C13- C15- C14- C19

<sup>a</sup> Institut für Organische Chemie, Universität Regensburg, D-93053 Regensburg, Germany. E-mail: ruth.gschwind@chemie.uni-regensburg.de

<sup>b</sup> Institute of Physical and Theoretical Chemistry, University of Regensburg, D-93053, Germany



|    |    |    |    |   |        |         |    |      |      |      |     |
|----|----|----|----|---|--------|---------|----|------|------|------|-----|
| 20 | 18 | 19 | 66 | 4 | 180.00 | 4.60240 | 2; | C14- | C12- | C13- | H5  |
| 20 | 22 | 21 | 67 | 4 | 180.00 | 4.60240 | 2; | C14- | C16- | C15- | H6  |
| 20 | 24 | 25 | 16 | 4 | 180.00 | 4.60240 | 2; | C14- | C18- | C19- | C10 |
| 21 | 23 | 22 | 68 | 4 | 180.00 | 4.60240 | 2; | C15- | C17- | C16- | H7  |
| 22 | 24 | 23 | 69 | 4 | 180.00 | 4.60240 | 2; | C16- | C18- | C17- | H8  |
| 23 | 25 | 24 | 70 | 4 | 180.00 | 4.60240 | 2; | C17- | C19- | C18- | H9  |
| 35 | 37 | 36 | 49 | 4 | 180.00 | 4.60240 | 2; | C23- | C25- | C24- | C34 |
| 35 | 39 | 27 | 8  | 4 | 180.00 | 4.60240 | 2; | C23- | C27- | C21- | C2  |
| 36 | 27 | 35 | 71 | 4 | 180.00 | 4.60240 | 2; | C24- | C21- | C23- | H10 |
| 36 | 38 | 37 | 72 | 4 | 180.00 | 4.60240 | 2; | C24- | C26- | C25- | H11 |
| 38 | 27 | 39 | 73 | 4 | 180.00 | 4.60240 | 2; | C26- | C21- | C27- | H12 |
| 40 | 44 | 26 | 18 | 4 | 180.00 | 4.60240 | 2; | C28- | C32- | C20- | C12 |
| 41 | 26 | 40 | 74 | 4 | 180.00 | 4.60240 | 2; | C29- | C20- | C28- | H13 |
| 41 | 43 | 42 | 75 | 4 | 180.00 | 4.60240 | 2; | C29- | C31- | C30- | H14 |
| 43 | 26 | 44 | 76 | 4 | 180.00 | 4.60240 | 2; | C31- | C20- | C32- | H15 |
| 45 | 37 | 38 | 39 | 4 | 180.00 | 4.60240 | 2; | C33- | C25- | C26- | C27 |
| 53 | 42 | 43 | 44 | 4 | 180.00 | 4.60240 | 2; | C35- | C30- | C31- | C32 |
| 57 | 40 | 41 | 42 | 4 | 180.00 | 4.60240 | 2; | C36- | C28- | C29- | C30 |

---

<sup>a</sup> Institut für Organische Chemie, Universität Regensburg, D-93053 Regensburg, Germany. E-mail: ruth.gschwind@chemie.uni-regensburg.de

<sup>b</sup> Institute of Physical and Theoretical Chemistry, University of Regensburg, D-93053, Germany

Iminium-cation

[ moleculetype ]

;name nrexcl

MAE 3

[ atoms ]

|    |    |   |     |     |    |               |          |
|----|----|---|-----|-----|----|---------------|----------|
| 1  | na | 1 | MAE | N   | 1  | -0.5019940291 | 14.01000 |
| 2  | ce | 1 | MAE | C   | 2  | 0.5055575319  | 12.01000 |
| 3  | ca | 1 | MAE | C1  | 3  | 0.4365084735  | 12.01000 |
| 4  | ca | 1 | MAE | C2  | 4  | -0.3155317549 | 12.01000 |
| 5  | ca | 1 | MAE | C3  | 5  | -0.0605277162 | 12.01000 |
| 6  | ca | 1 | MAE | C4  | 6  | -0.1528215726 | 12.01000 |
| 7  | ca | 1 | MAE | C5  | 7  | -0.0759100819 | 12.01000 |
| 8  | ca | 1 | MAE | C6  | 8  | -0.2939740325 | 12.01000 |
| 9  | ca | 1 | MAE | C7  | 9  | -0.1121681626 | 12.01000 |
| 10 | c3 | 1 | MAE | C8  | 10 | -0.4473984112 | 12.01000 |
| 11 | ca | 1 | MAE | C9  | 11 | -0.0768536472 | 12.01000 |
| 12 | ca | 1 | MAE | C10 | 12 | -0.3338791757 | 12.01000 |
| 13 | ca | 1 | MAE | C11 | 13 | 0.5264880982  | 12.01000 |
| 14 | ca | 1 | MAE | C12 | 14 | -0.2640418041 | 12.01000 |
| 15 | ca | 1 | MAE | C13 | 15 | -0.1237506703 | 12.01000 |
| 16 | os | 1 | MAE | O   | 16 | -0.3668202686 | 16.00000 |
| 17 | c3 | 1 | MAE | C14 | 17 | 0.0565960320  | 12.01000 |
| 18 | hn | 1 | MAE | H   | 18 | 0.3801451114  | 1.00800  |
| 19 | ha | 1 | MAE | H1  | 19 | 0.2004808690  | 1.00800  |
| 20 | ha | 1 | MAE | H2  | 20 | 0.1387034634  | 1.00800  |
| 21 | ha | 1 | MAE | H3  | 21 | 0.1473165056  | 1.00800  |
| 22 | ha | 1 | MAE | H4  | 22 | 0.1455940644  | 1.00800  |
| 23 | ha | 1 | MAE | H5  | 23 | 0.1877996713  | 1.00800  |
| 24 | hc | 1 | MAE | H6  | 24 | 0.1650739263  | 1.00800  |

<sup>a</sup> Institut für Organische Chemie, Universität Regensburg, D-93053 Regensburg, Germany. E-mail: ruth.gschwind@chemie.uni-regensburg.de

<sup>b</sup> Institute of Physical and Theoretical Chemistry, University of Regensburg, D-93053, Germany

|    |    |   |     |     |    |              |         |
|----|----|---|-----|-----|----|--------------|---------|
| 25 | hc | 1 | MAE | H7  | 25 | 0.1650739263 | 1.00800 |
| 26 | hc | 1 | MAE | H8  | 26 | 0.1650739263 | 1.00800 |
| 27 | ha | 1 | MAE | H9  | 27 | 0.1757174210 | 1.00800 |
| 28 | ha | 1 | MAE | H10 | 28 | 0.1784330807 | 1.00800 |
| 29 | ha | 1 | MAE | H11 | 29 | 0.1734240999 | 1.00800 |
| 30 | ha | 1 | MAE | H12 | 30 | 0.1666439014 | 1.00800 |
| 31 | h1 | 1 | MAE | H13 | 31 | 0.0703470748 | 1.00800 |
| 32 | h1 | 1 | MAE | H14 | 32 | 0.0703470748 | 1.00800 |
| 33 | h1 | 1 | MAE | H15 | 33 | 0.0703470748 | 1.00800 |

[bonds]

|  | ai | aj | funct | r          | k          |          |
|--|----|----|-------|------------|------------|----------|
|  | 1  | 2  | 1     | 1.4209e-01 | 3.1263e+05 | N - C    |
|  | 1  | 3  | 1     | 1.3840e-01 | 3.5187e+05 | N - C1   |
|  | 1  | 18 | 1     | 1.0100e-01 | 3.4175e+05 | N - H    |
|  | 2  | 9  | 1     | 1.4763e-01 | 3.0234e+05 | C - C7   |
|  | 2  | 10 | 1     | 1.5159e-01 | 2.6836e+05 | C - C8   |
|  | 3  | 4  | 1     | 1.3984e-01 | 3.8585e+05 | C1 - C2  |
|  | 3  | 8  | 1     | 1.3984e-01 | 3.8585e+05 | C1 - C6  |
|  | 4  | 5  | 1     | 1.3984e-01 | 3.8585e+05 | C2 - C3  |
|  | 4  | 19 | 1     | 1.0860e-01 | 2.8937e+05 | C2 - H1  |
|  | 5  | 6  | 1     | 1.3984e-01 | 3.8585e+05 | C3 - C4  |
|  | 5  | 20 | 1     | 1.0860e-01 | 2.8937e+05 | C3 - H2  |
|  | 6  | 7  | 1     | 1.3984e-01 | 3.8585e+05 | C4 - C5  |
|  | 6  | 21 | 1     | 1.0860e-01 | 2.8937e+05 | C4 - H3  |
|  | 7  | 8  | 1     | 1.3984e-01 | 3.8585e+05 | C5 - C6  |
|  | 7  | 22 | 1     | 1.0860e-01 | 2.8937e+05 | C5 - H4  |
|  | 8  | 23 | 1     | 1.0860e-01 | 2.8937e+05 | C6 - H5  |
|  | 9  | 11 | 1     | 1.3984e-01 | 3.8585e+05 | C7 - C9  |
|  | 9  | 15 | 1     | 1.3984e-01 | 3.8585e+05 | C7 - C13 |
|  | 10 | 24 | 1     | 1.0969e-01 | 2.7665e+05 | C8 - H6  |

<sup>a</sup> Institut für Organische Chemie, Universität Regensburg, D-93053 Regensburg, Germany. E-mail: ruth.gschwind@chemie.uni-regensburg.de

<sup>b</sup> Institute of Physical and Theoretical Chemistry, University of Regensburg, D-93053, Germany

|    |    |   |            |            |             |
|----|----|---|------------|------------|-------------|
| 10 | 25 | 1 | 1.0969e-01 | 2.7665e+05 | ; C8 - H7   |
| 10 | 26 | 1 | 1.0969e-01 | 2.7665e+05 | ; C8 - H8   |
| 11 | 12 | 1 | 1.3984e-01 | 3.8585e+05 | ; C9 - C10  |
| 11 | 27 | 1 | 1.0860e-01 | 2.8937e+05 | ; C9 - H9   |
| 12 | 13 | 1 | 1.3984e-01 | 3.8585e+05 | ; C10 - C11 |
| 12 | 28 | 1 | 1.0860e-01 | 2.8937e+05 | ; C10 - H10 |
| 13 | 14 | 1 | 1.3984e-01 | 3.8585e+05 | ; C11 - C12 |
| 13 | 16 | 1 | 1.3696e-01 | 3.1514e+05 | ; C11 - O   |
| 14 | 15 | 1 | 1.3984e-01 | 3.8585e+05 | ; C12 - C13 |
| 14 | 29 | 1 | 1.0860e-01 | 2.8937e+05 | ; C12 - H11 |
| 15 | 30 | 1 | 1.0860e-01 | 2.8937e+05 | ; C13 - H12 |
| 16 | 17 | 1 | 1.4316e-01 | 2.5824e+05 | ; O - C14   |
| 17 | 31 | 1 | 1.0969e-01 | 2.7665e+05 | ; C14 - H13 |
| 17 | 32 | 1 | 1.0969e-01 | 2.7665e+05 | ; C14 - H14 |
| 17 | 33 | 1 | 1.0969e-01 | 2.7665e+05 | ; C14 - H15 |

[ pairs ]

; ai aj funct

|   |    |   |           |
|---|----|---|-----------|
| 1 | 5  | 1 | ; N - C3  |
| 1 | 7  | 1 | ; N - C5  |
| 1 | 11 | 1 | ; N - C9  |
| 1 | 15 | 1 | ; N - C13 |
| 1 | 19 | 1 | ; N - H1  |
| 1 | 23 | 1 | ; N - H5  |
| 1 | 24 | 1 | ; N - H6  |
| 1 | 25 | 1 | ; N - H7  |
| 1 | 26 | 1 | ; N - H8  |
| 2 | 4  | 1 | ; C - C2  |
| 2 | 8  | 1 | ; C - C6  |
| 2 | 12 | 1 | ; C - C10 |

<sup>a</sup> Institut für Organische Chemie, Universität Regensburg, D-93053 Regensburg, Germany. E-mail: ruth.gschwind@chemie.uni-regensburg.de

<sup>b</sup> Institute of Physical and Theoretical Chemistry, University of Regensburg, D-93053, Germany

2 14 1; C - C12  
2 27 1; C - H9  
2 30 1; C - H12  
3 6 1; C1 - C4  
3 9 1; C1 - C7  
3 10 1; C1 - C8  
3 20 1; C1 - H2  
3 22 1; C1 - H4  
4 7 1; C2 - C5  
4 21 1; C2 - H3  
4 23 1; C2 - H5  
5 8 1; C3 - C6  
5 22 1; C3 - H4  
6 19 1; C4 - H1  
6 23 1; C4 - H5  
7 20 1; C5 - H2  
8 19 1; C6 - H1  
8 21 1; C6 - H3  
9 13 1; C7 - C11  
9 24 1; C7 - H6  
9 25 1; C7 - H7  
9 26 1; C7 - H8  
9 28 1; C7 - H10  
9 29 1; C7 - H11  
10 11 1; C8 - C9  
10 15 1; C8 - C13  
11 14 1; C9 - C12  
11 16 1; C9 - O  
11 30 1; C9 - H12  
12 15 1; C10 - C13

---

<sup>a</sup> Institut für Organische Chemie, Universität Regensburg, D-93053 Regensburg, Germany. E-mail: ruth.gschwind@chemie.uni-regensburg.de

<sup>b</sup> Institute of Physical and Theoretical Chemistry, University of Regensburg, D-93053, Germany

12 17 1; C10 - C14  
 12 29 1; C10 - H11  
 13 27 1; C11 - H9  
 13 30 1; C11 - H12  
 13 31 1; C11 - H13  
 13 32 1; C11 - H14  
 13 33 1; C11 - H15  
 14 17 1; C12 - C14  
 14 28 1; C12 - H10  
 15 16 1; C13 - O  
 15 27 1; C13 - H9  
 16 28 1; O - H10  
 16 29 1; O - H11  
 18 4 1; H - C2  
 18 8 1; H - C6  
 18 9 1; H - C7  
 18 10 1; H - C8  
 19 20 1; H1 - H2  
 20 21 1; H2 - H3  
 21 22 1; H3 - H4  
 22 23 1; H4 - H5  
 27 28 1; H9 - H10  
 29 30 1; H11 - H12

[ angles ]

| ; ai | aj | ak | funct | theta      | cth         |        |      |
|------|----|----|-------|------------|-------------|--------|------|
| 1    | 2  | 9  | 1     | 1.1919e+02 | 5.7823e+02; | N - C  | - C7 |
| 1    | 2  | 10 | 1     | 1.1956e+02 | 5.4894e+02; | N - C  | - C8 |
| 1    | 3  | 4  | 1     | 1.1834e+02 | 5.7823e+02; | N - C1 | - C2 |
| 1    | 3  | 8  | 1     | 1.1834e+02 | 5.7823e+02; | N - C1 | - C6 |

<sup>a</sup> Institut für Organische Chemie, Universität Regensburg, D-93053 Regensburg, Germany. E-mail: ruth.gschwind@chemie.uni-regensburg.de

<sup>b</sup> Institute of Physical and Theoretical Chemistry, University of Regensburg, D-93053, Germany

|    |    |    |   |            |             |          |       |
|----|----|----|---|------------|-------------|----------|-------|
| 2  | 1  | 3  | 1 | 1.2661e+02 | 5.2635e+02; | C - N    | - C1  |
| 2  | 1  | 18 | 1 | 1.2554e+02 | 3.8995e+02; | C - N    | - H   |
| 2  | 9  | 11 | 1 | 1.2082e+02 | 5.3974e+02; | C - C7   | - C9  |
| 2  | 9  | 15 | 1 | 1.2082e+02 | 5.3974e+02; | C - C7   | - C13 |
| 2  | 10 | 24 | 1 | 1.1059e+02 | 3.9162e+02; | C - C8   | - H6  |
| 2  | 10 | 25 | 1 | 1.1059e+02 | 3.9162e+02; | C - C8   | - H7  |
| 2  | 10 | 26 | 1 | 1.1059e+02 | 3.9162e+02; | C - C8   | - H8  |
| 3  | 1  | 18 | 1 | 1.2554e+02 | 3.8995e+02; | C1 - N   | - H   |
| 3  | 4  | 5  | 1 | 1.2002e+02 | 5.5731e+02; | C1 - C2  | - C3  |
| 3  | 4  | 19 | 1 | 1.1988e+02 | 4.0334e+02; | C1 - C2  | - H1  |
| 3  | 8  | 7  | 1 | 1.2002e+02 | 5.5731e+02; | C1 - C6  | - C5  |
| 3  | 8  | 23 | 1 | 1.1988e+02 | 4.0334e+02; | C1 - C6  | - H5  |
| 4  | 3  | 8  | 1 | 1.2002e+02 | 5.5731e+02; | C2 - C1  | - C6  |
| 4  | 5  | 6  | 1 | 1.2002e+02 | 5.5731e+02; | C2 - C3  | - C4  |
| 4  | 5  | 20 | 1 | 1.1988e+02 | 4.0334e+02; | C2 - C3  | - H2  |
| 5  | 4  | 19 | 1 | 1.1988e+02 | 4.0334e+02; | C3 - C2  | - H1  |
| 5  | 6  | 7  | 1 | 1.2002e+02 | 5.5731e+02; | C3 - C4  | - C5  |
| 5  | 6  | 21 | 1 | 1.1988e+02 | 4.0334e+02; | C3 - C4  | - H3  |
| 6  | 5  | 20 | 1 | 1.1988e+02 | 4.0334e+02; | C4 - C3  | - H2  |
| 6  | 7  | 8  | 1 | 1.2002e+02 | 5.5731e+02; | C4 - C5  | - C6  |
| 6  | 7  | 22 | 1 | 1.1988e+02 | 4.0334e+02; | C4 - C5  | - H4  |
| 7  | 6  | 21 | 1 | 1.1988e+02 | 4.0334e+02; | C5 - C4  | - H3  |
| 7  | 8  | 23 | 1 | 1.1988e+02 | 4.0334e+02; | C5 - C6  | - H5  |
| 8  | 7  | 22 | 1 | 1.1988e+02 | 4.0334e+02; | C6 - C5  | - H4  |
| 9  | 2  | 10 | 1 | 1.1924e+02 | 5.2300e+02; | C7 - C   | - C8  |
| 9  | 11 | 12 | 1 | 1.2002e+02 | 5.5731e+02; | C7 - C9  | - C10 |
| 9  | 11 | 27 | 1 | 1.1988e+02 | 4.0334e+02; | C7 - C9  | - H9  |
| 9  | 15 | 14 | 1 | 1.2002e+02 | 5.5731e+02; | C7 - C13 | - C12 |
| 9  | 15 | 30 | 1 | 1.1988e+02 | 4.0334e+02; | C7 - C13 | - H12 |
| 11 | 9  | 15 | 1 | 1.2002e+02 | 5.5731e+02; | C9 - C7  | - C13 |

<sup>a</sup> Institut für Organische Chemie, Universität Regensburg, D-93053 Regensburg, Germany. E-mail: ruth.gschwind@chemie.uni-regensburg.de

<sup>b</sup> Institute of Physical and Theoretical Chemistry, University of Regensburg, D-93053, Germany

|    |    |    |   |            |             |           |       |
|----|----|----|---|------------|-------------|-----------|-------|
| 11 | 12 | 13 | 1 | 1.2002e+02 | 5.5731e+02; | C9 - C10  | - C11 |
| 11 | 12 | 28 | 1 | 1.1988e+02 | 4.0334e+02; | C9 - C10  | - H10 |
| 12 | 11 | 27 | 1 | 1.1988e+02 | 4.0334e+02; | C10 - C9  | - H9  |
| 12 | 13 | 14 | 1 | 1.2002e+02 | 5.5731e+02; | C10 - C11 | - C12 |
| 12 | 13 | 16 | 1 | 1.1920e+02 | 5.8241e+02; | C10 - C11 | - O   |
| 13 | 12 | 28 | 1 | 1.1988e+02 | 4.0334e+02; | C11 - C10 | - H10 |
| 13 | 14 | 15 | 1 | 1.2002e+02 | 5.5731e+02; | C11 - C12 | - C13 |
| 13 | 14 | 29 | 1 | 1.1988e+02 | 4.0334e+02; | C11 - C12 | - H11 |
| 13 | 16 | 17 | 1 | 1.1796e+02 | 5.2300e+02; | C11 - O   | - C14 |
| 14 | 13 | 16 | 1 | 1.1920e+02 | 5.8241e+02; | C12 - C11 | - O   |
| 14 | 15 | 30 | 1 | 1.1988e+02 | 4.0334e+02; | C12 - C13 | - H12 |
| 15 | 14 | 29 | 1 | 1.1988e+02 | 4.0334e+02; | C13 - C12 | - H11 |
| 16 | 17 | 31 | 1 | 1.0978e+02 | 4.2509e+02; | O - C14   | - H13 |
| 16 | 17 | 32 | 1 | 1.0978e+02 | 4.2509e+02; | O - C14   | - H14 |
| 16 | 17 | 33 | 1 | 1.0978e+02 | 4.2509e+02; | O - C14   | - H15 |
| 24 | 10 | 25 | 1 | 1.0758e+02 | 3.2970e+02; | H6 - C8   | - H7  |
| 24 | 10 | 26 | 1 | 1.0758e+02 | 3.2970e+02; | H6 - C8   | - H8  |
| 25 | 10 | 26 | 1 | 1.0758e+02 | 3.2970e+02; | H7 - C8   | - H8  |
| 31 | 17 | 32 | 1 | 1.0846e+02 | 3.2803e+02; | H13 - C14 | - H14 |
| 31 | 17 | 33 | 1 | 1.0846e+02 | 3.2803e+02; | H13 - C14 | - H15 |
| 32 | 17 | 33 | 1 | 1.0846e+02 | 3.2803e+02; | H14 - C14 | - H15 |

[ dihedrals ] ; propers

; for gromacs 4.5 or higher, using funct 9

; i j k l func phase kd pn

|   |   |    |    |   |        |         |    |    |    |     |     |
|---|---|----|----|---|--------|---------|----|----|----|-----|-----|
| 1 | 2 | 9  | 11 | 9 | 180.00 | 2.92880 | 2; | N- | C- | C7- | C9  |
| 1 | 2 | 9  | 15 | 9 | 180.00 | 2.92880 | 2; | N- | C- | C7- | C13 |
| 1 | 2 | 10 | 24 | 9 | 0.00   | 0.00000 | 0; | N- | C- | C8- | H6  |
| 1 | 2 | 10 | 25 | 9 | 0.00   | 0.00000 | 0; | N- | C- | C8- | H7  |
| 1 | 2 | 10 | 26 | 9 | 0.00   | 0.00000 | 0; | N- | C- | C8- | H8  |

<sup>a</sup> Institut für Organische Chemie, Universität Regensburg, D-93053 Regensburg, Germany. E-mail: ruth.gschwind@chemie.uni-regensburg.de

<sup>b</sup> Institute of Physical and Theoretical Chemistry, University of Regensburg, D-93053, Germany



1 3 4 5 9 180.00 15.16700 2; N- C1- C2- C3  
 1 3 4 19 9 180.00 15.16700 2; N- C1- C2- H1  
 1 3 8 7 9 180.00 15.16700 2; N- C1- C6- C5  
 1 3 8 23 9 180.00 15.16700 2; N- C1- C6- H5  
 2 1 3 4 9 180.00 1.25520 2; C- N- C1- C2  
 2 1 3 8 9 180.00 1.25520 2; C- N- C1- C6  
 2 9 11 12 9 180.00 15.16700 2; C- C7- C9- C10  
 2 9 11 27 9 180.00 15.16700 2; C- C7- C9- H9  
 2 9 15 14 9 180.00 15.16700 2; C- C7- C13- C12  
 2 9 15 30 9 180.00 15.16700 2; C- C7- C13- H12  
 3 1 2 9 9 180.00 7.11280 2; C1- N- C- C7  
 3 1 2 10 9 180.00 7.11280 2; C1- N- C- C8  
 3 4 5 6 9 180.00 15.16700 2; C1- C2- C3- C4  
 3 4 5 20 9 180.00 15.16700 2; C1- C2- C3- H2  
 3 8 7 6 9 180.00 15.16700 2; C1- C6- C5- C4  
 3 8 7 22 9 180.00 15.16700 2; C1- C6- C5- H4  
 4 3 8 7 9 180.00 15.16700 2; C2- C1- C6- C5  
 4 3 8 23 9 180.00 15.16700 2; C2- C1- C6- H5  
 4 5 6 7 9 180.00 15.16700 2; C2- C3- C4- C5  
 4 5 6 21 9 180.00 15.16700 2; C2- C3- C4- H3  
 5 4 3 8 9 180.00 15.16700 2; C3- C2- C1- C6  
 5 6 7 8 9 180.00 15.16700 2; C3- C4- C5- C6  
 5 6 7 22 9 180.00 15.16700 2; C3- C4- C5- H4  
 6 5 4 19 9 180.00 15.16700 2; C4- C3- C2- H1  
 6 7 8 23 9 180.00 15.16700 2; C4- C5- C6- H5  
 7 6 5 20 9 180.00 15.16700 2; C5- C4- C3- H2  
 8 3 4 19 9 180.00 15.16700 2; C6- C1- C2- H1  
 8 7 6 21 9 180.00 15.16700 2; C6- C5- C4- H3  
 9 2 10 24 9 0.00 0.00000 0; C7- C- C8- H6  
 9 2 10 24 9 0.00 4.81160 1; C7- C- C8- H6

<sup>a</sup> Institut für Organische Chemie, Universität Regensburg, D-93053 Regensburg, Germany. E-mail: ruth.gschwind@chemie.uni-regensburg.de

<sup>b</sup> Institute of Physical and Theoretical Chemistry, University of Regensburg, D-93053, Germany

9 2 10 24 9 180.00 1.58992 3; C7- C- C8- H6  
 9 2 10 25 9 0.00 0.00000 0; C7- C- C8- H7  
 9 2 10 25 9 0.00 4.81160 1; C7- C- C8- H7  
 9 2 10 25 9 180.00 1.58992 3; C7- C- C8- H7  
 9 2 10 26 9 0.00 0.00000 0; C7- C- C8- H8  
 9 2 10 26 9 0.00 4.81160 1; C7- C- C8- H8  
 9 2 10 26 9 180.00 1.58992 3; C7- C- C8- H8  
 9 11 12 13 9 180.00 15.16700 2; C7- C9- C10- C11  
 9 11 12 28 9 180.00 15.16700 2; C7- C9- C10- H10  
 9 15 14 13 9 180.00 15.16700 2; C7- C13- C12- C11  
 9 15 14 29 9 180.00 15.16700 2; C7- C13- C12- H11  
 10 2 9 11 9 180.00 2.92880 2; C8- C- C7- C9  
 10 2 9 15 9 180.00 2.92880 2; C8- C- C7- C13  
 11 9 15 14 9 180.00 15.16700 2; C9- C7- C13- C12  
 11 9 15 30 9 180.00 15.16700 2; C9- C7- C13- H12  
 11 12 13 14 9 180.00 15.16700 2; C9- C10- C11- C12  
 11 12 13 16 9 180.00 15.16700 2; C9- C10- C11- O  
 12 11 9 15 9 180.00 15.16700 2; C10- C9- C7- C13  
 12 13 14 15 9 180.00 15.16700 2; C10- C11- C12- C13  
 12 13 14 29 9 180.00 15.16700 2; C10- C11- C12- H11  
 12 13 16 17 9 180.00 3.76560 2; C10- C11- O- C14  
 13 12 11 27 9 180.00 15.16700 2; C11- C10- C9- H9  
 13 14 15 30 9 180.00 15.16700 2; C11- C12- C13- H12  
 13 16 17 31 9 0.00 1.60387 3; C11- O- C14- H13  
 13 16 17 32 9 0.00 1.60387 3; C11- O- C14- H14  
 13 16 17 33 9 0.00 1.60387 3; C11- O- C14- H15  
 14 13 12 28 9 180.00 15.16700 2; C12- C11- C10- H10  
 14 13 16 17 9 180.00 3.76560 2; C12- C11- O- C14  
 15 9 11 27 9 180.00 15.16700 2; C13- C7- C9- H9  
 15 14 13 16 9 180.00 15.16700 2; C13- C12- C11- O

<sup>a</sup> Institut für Organische Chemie, Universität Regensburg, D-93053 Regensburg, Germany. E-mail: ruth.gschwind@chemie.uni-regensburg.de

<sup>b</sup> Institute of Physical and Theoretical Chemistry, University of Regensburg, D-93053, Germany

```

16 13 12 28 9 180.00 15.16700 2; O- C11- C10- H10
16 13 14 29 9 180.00 15.16700 2; O- C11- C12- H11
18 1 2 9 9 180.00 7.11280 2; H- N- C- C7
18 1 2 10 9 180.00 7.11280 2; H- N- C- C8
18 1 3 4 9 180.00 1.25520 2; H- N- C1- C2
18 1 3 8 9 180.00 1.25520 2; H- N- C1- C6
19 4 5 20 9 180.00 15.16700 2; H1- C2- C3- H2
20 5 6 21 9 180.00 15.16700 2; H2- C3- C4- H3
21 6 7 22 9 180.00 15.16700 2; H3- C4- C5- H4
22 7 8 23 9 180.00 15.16700 2; H4- C5- C6- H5
27 11 12 28 9 180.00 15.16700 2; H9- C9- C10- H10
29 14 15 30 9 180.00 15.16700 2; H11- C12- C13- H12

```

[ dihedrals ] ; impropers

; treated as propers in GROMACS to use correct AMBER analytical function

```

; i j k l func phase kd pn
1 2 9 10 4 180.00 4.60240 2; N- C- C7- C8
1 3 8 4 4 180.00 4.60240 2; N- C1- C6- C2
3 5 4 19 4 180.00 4.60240 2; C1- C3- C2- H1
3 7 8 23 4 180.00 4.60240 2; C1- C5- C6- H5
4 6 5 20 4 180.00 4.60240 2; C2- C4- C3- H2
5 7 6 21 4 180.00 4.60240 2; C3- C5- C4- H3
6 8 7 22 4 180.00 4.60240 2; C4- C6- C5- H4
9 12 11 27 4 180.00 4.60240 2; C7- C10- C9- H9
9 14 15 30 4 180.00 4.60240 2; C7- C12- C13- H12
11 13 12 28 4 180.00 4.60240 2; C9- C11- C10- H10
11 15 9 2 4 180.00 4.60240 2; C9- C13- C7- C
12 14 13 16 4 180.00 4.60240 2; C10- C12- C11- O
13 15 14 29 4 180.00 4.60240 2; C11- C13- C12- H11
18 1 2 3 4 180.00 4.60240 2; H- N- C- C1

```

<sup>a</sup> Institut für Organische Chemie, Universität Regensburg, D-93053 Regensburg, Germany. E-mail: ruth.gschwind@chemie.uni-regensburg.de

<sup>b</sup> Institute of Physical and Theoretical Chemistry, University of Regensburg, D-93053, Germany



DCM

[ atomtypes ]

```
c3s  c3s    0.00000 0.00000  A  3.39967e-01  4.57730e-01
cls  cls    0.00000 0.00000  A  3.30000e-01  1.20000e+00
h2s  h2s    0.00000 0.00000  V  2.29317e-01  6.56888e-02
```

[ moleculetype ]

```
;name      nrexcl2
DCM        3
```

[ atoms ]

```
; nr type resi res atom cgnr  charge  mass  ;
  1 c3s  1 DCM  Cs  1 -0.137416  14.01000 ;
  2 cls  1 DCM  Cls  2 -0.117537  35.45000 ;
  3 h2s  1 DCM  Hs  3  0.184786   0.00000 ;
  4 cls  1 DCM  Cls1  4 -0.115826  35.45000 ;
  5 h2s  1 DCM  Hs1  5  0.185993   0.00000 ;
```

[ bonds ]

```
; ai  aj funct r      k
  1  2  1  1.7860e-01  2.3347e+05;  C - cl2s
  1  4  1  1.7860e-01  2.3347e+05;  C - cl2s1
```

[ angles ]

```
; ai  aj  ak  funct  theta  cth
  2  1  4  1  1.1103e+02  4.5380e+02;  cl2s - C  - cl2s1
```

[ virtual\\_sites3 ]

---

<sup>a</sup> Institut für Organische Chemie, Universität Regensburg, D-93053 Regensburg, Germany. E-mail: ruth.gschwind@chemie.uni-regensburg.de

<sup>b</sup> Institute of Physical and Theoretical Chemistry, University of Regensburg, D-93053, Germany

; Site from            funct a        b        c

3    1   2   4    4   -0.2831048825030728 -0.2831048825030728 -  
3.154641146073173

5    1   2   4    4   -0.2831048825030728 -0.2831048825030728  
3.154641146073173

[ exclusions ]

3 1 2 4 5

5 1 2 3 4

---

<sup>a</sup> Institut für Organische Chemie, Universität Regensburg, D-93053 Regensburg, Germany. E-mail: ruth.gschwind@chemie.uni-regensburg.de

<sup>b</sup> Institute of Physical and Theoretical Chemistry, University of Regensburg, D-93053, Germany

## DFT structure optimization results based on the MD-structure motif, which was identified with possible NOE-contacts

*Final energy, structure and Mayer bond orders for the optimized neutral complex consisting of both NTPA and E-imin*

The structure optimization based on a MD-snapshot was followed with a numerical frequency calculation (in ORCA 5.0.2 with B3LYP D3BJ def2-TZVP CPCM(CH<sub>2</sub>Cl<sub>2</sub>) NUMFREQ defgrid3). It yielded the following:

```
-----
Dispersion correction      -0.333128479
-----
-----
FINAL SINGLE POINT ENERGY -4798.906228846667
-----
```

All vibrational frequencies were shown to be positive, which let's us assume that the MD structure (corresponding to possible NOE-signals) found is actually a minimum structure. The fact that the H-bond H atom remains does not change its positioning is a good indication that the H-bond situation is as described (at least a local minimum exists that corresponds to the structure). While this is of course no proof, a more in-depth investigation (using e.g. relaxed scans) was not feasible. However, together with the experimental results this is a good indication. *Figure S71* shows the optimized structure, and the coordinates are given below:

---

<sup>a</sup> Institut für Organische Chemie, Universität Regensburg, D-93053 Regensburg, Germany. E-mail: ruth.gschwind@chemie.uni-regensburg.de

<sup>b</sup> Institute of Physical and Theoretical Chemistry, University of Regensburg, D-93053, Germany

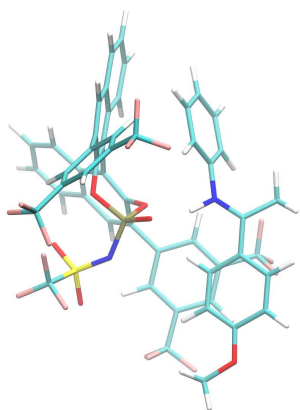

*Figure S71: Optimized complex structure based on the MD-structure motif, related to the supposed NOE contacts.*



For comparison with the bond situation of the pure NTPA anion, the Mayer bond orders are given again for the obtained neutral iminium-NTPA complex: it is clear that the model used for the N- in the ff-MD should still hold true, because no fundamental changes occur in the vicinity.

Mayer bond orders larger than 0.100000

B( 0-N , 1-C ) : 1.5470 B( 0-N , 2-C ) : 0.8552 B( 0-N , 17-H ) : 0.8037  
B( 1-C , 8-C ) : 1.0361 B( 1-C , 9-C ) : 1.0001 B( 2-C , 3-C ) : 1.3750  
B( 2-C , 7-C ) : 1.3821 B( 3-C , 4-C ) : 1.4143 B( 3-C , 18-H ) : 0.9644  
B( 4-C , 5-C ) : 1.3668 B( 4-C , 19-H ) : 0.9677 B( 5-C , 6-C ) : 1.3778  
B( 5-C , 20-H ) : 0.9672 B( 6-C , 7-C ) : 1.3904 B( 6-C , 21-H ) : 0.9821  
B( 7-C , 22-H ) : 0.9510 B( 8-C , 10-C ) : 1.2898 B( 8-C , 14-C ) : 1.2263  
B( 9-C , 23-H ) : 0.9370 B( 9-C , 24-H ) : 0.9631 B( 9-C , 25-H ) : 0.9385  
B( 10-C , 11-C ) : 1.5299 B( 10-C , 26-H ) : 0.8795 B( 11-C , 12-C ) : 1.2396  
B( 11-C , 27-H ) : 0.9540 B( 12-C , 13-C ) : 1.2912 B( 12-C , 15-O ) : 1.1794  
B( 13-C , 14-C ) : 1.5107 B( 13-C , 28-H ) : 0.9920 B( 14-C , 29-H ) : 0.9803  
B( 15-O , 16-C ) : 0.8887 B( 16-C , 30-H ) : 0.9644 B( 16-C , 31-H ) : 0.9656  
B( 16-C , 32-H ) : 0.9609 B( 17-H , 34-O ) : 0.1353 B( 33-P , 34-O ) : 1.7549  
B( 33-P , 35-N ) : 1.3537 B( 33-P , 36-O ) : 0.9931 B( 33-P , 37-O ) : 1.0822  
B( 35-N , 60-S ) : 1.3320 B( 36-O , 39-C ) : 0.7766 B( 37-O , 49-C ) : 0.8516  
B( 38-C , 39-C ) : 1.4428 B( 38-C , 47-C ) : 1.0422 B( 38-C , 48-C ) : 0.7864  
B( 39-C , 40-C ) : 1.2752 B( 40-C , 41-C ) : 1.4469 B( 40-C , 59-C ) : 0.8348  
B( 41-C , 42-C ) : 1.2124 B( 41-C , 93-H ) : 0.9974 B( 42-C , 43-C ) : 1.2126  
B( 42-C , 47-C ) : 1.2768 B( 43-C , 44-C ) : 1.5125 B( 43-C , 94-H ) : 0.9871  
B( 44-C , 45-C ) : 1.2502 B( 44-C , 95-H ) : 0.9804 B( 45-C , 46-C ) : 1.5353  
B( 45-C , 96-H ) : 0.9784 B( 46-C , 47-C ) : 1.2495 B( 46-C , 97-H ) : 0.9675  
B( 48-C , 49-C ) : 1.4454 B( 48-C , 57-C ) : 1.0635 B( 49-C , 50-C ) : 1.2759

<sup>a</sup> Institut für Organische Chemie, Universität Regensburg, D-93053 Regensburg, Germany. E-mail: ruth.gschwind@chemie.uni-regensburg.de

<sup>b</sup> Institute of Physical and Theoretical Chemistry, University of Regensburg, D-93053, Germany

B( 50-C , 51-C ) : 1.3974 B( 50-C , 58-C ) : 0.8896 B( 51-C , 52-C ) : 1.1910  
B( 51-C , 98-H ) : 1.0111 B( 52-C , 53-C ) : 1.2041 B( 52-C , 57-C ) : 1.2298  
B( 53-C , 54-C ) : 1.5091 B( 53-C , 99-H ) : 0.9919 B( 54-C , 55-C ) : 1.2411  
B( 54-C , 100-H ) : 0.9848 B( 55-C , 56-C ) : 1.5257 B( 55-C , 101-H ) : 0.9806  
B( 56-C , 57-C ) : 1.2478 B( 56-C , 102-H ) : 0.9776 B( 58-C , 72-C ) : 1.2915  
B( 58-C , 76-C ) : 1.3964 B( 59-C , 67-C ) : 1.3874 B( 59-C , 71-C ) : 1.3105  
B( 60-S , 61-O ) : 1.7859 B( 60-S , 62-O ) : 1.7941 B( 60-S , 63-C ) : 0.8518  
B( 63-C , 64-F ) : 1.1262 B( 63-C , 65-F ) : 1.1191 B( 63-C , 66-F ) : 1.1101  
B( 67-C , 68-C ) : 1.3374 B( 67-C , 103-H ) : 0.9451 B( 68-C , 69-C ) : 1.3418  
B( 68-C , 81-C ) : 1.0033 B( 69-C , 70-C ) : 1.2812 B( 69-C , 104-H ) : 0.9742  
B( 70-C , 71-C ) : 1.3550 B( 70-C , 77-C ) : 1.0110 B( 71-C , 105-H ) : 0.9708  
B( 72-C , 73-C ) : 1.3855 B( 72-C , 106-H ) : 0.9674 B( 73-C , 74-C ) : 1.3213  
B( 73-C , 89-C ) : 1.0075 B( 74-C , 75-C ) : 1.3472 B( 74-C , 107-H ) : 0.9593  
B( 75-C , 76-C ) : 1.3686 B( 75-C , 85-C ) : 1.0035 B( 76-C , 108-H ) : 0.9307  
B( 77-C , 78-F ) : 1.0804 B( 77-C , 79-F ) : 1.1509 B( 77-C , 80-F ) : 1.0947  
B( 81-C , 82-F ) : 1.1010 B( 81-C , 83-F ) : 1.0990 B( 81-C , 84-F ) : 1.1341  
B( 85-C , 86-F ) : 1.1350 B( 85-C , 87-F ) : 1.1293 B( 85-C , 88-F ) : 1.1307  
B( 89-C , 90-F ) : 1.1182 B( 89-C , 91-F ) : 1.1151 B( 89-C , 92-F ) : 1.1287

---

<sup>a</sup> Institut für Organische Chemie, Universität Regensburg, D-93053 Regensburg, Germany. E-mail: ruth.gschwind@chemie.uni-regensburg.de

<sup>b</sup> Institute of Physical and Theoretical Chemistry, University of Regensburg, D-93053, Germany

## CARTESIAN COORDINATES (ANGSTROEM)

-----  
N 16.972588 19.993525 16.995068  
C 15.751628 19.706079 16.633159  
C 17.452732 21.211402 17.558156  
C 18.582937 21.795523 16.995924  
C 19.109955 22.943701 17.569733  
C 18.525455 23.490859 18.707039  
C 17.406030 22.888622 19.271234  
C 16.864586 21.743991 18.700285  
C 15.426904 18.327946 16.317053  
C 14.714254 20.770450 16.554805  
C 16.139491 17.274555 16.911274  
C 15.839231 15.954272 16.645012  
C 14.800471 15.650425 15.757433  
C 14.065608 16.690075 15.166551  
C 14.366710 18.001718 15.449986  
O 14.429975 14.403734 15.425565  
C 15.152619 13.296332 15.980159  
H 17.719715 19.284456 16.869863  
H 19.039746 21.348180 16.123808  
H 19.987936 23.401817 17.136475  
H 18.956389 24.370550 19.165305  
H 16.961076 23.299239 20.168111  
H 16.012741 21.253007 19.149522  
H 13.995852 20.646763 17.366715  
H 15.148102 21.764168 16.609596  
H 14.160551 20.670536 15.622305  
H 16.906575 17.482385 17.639200  
H 16.396998 15.176536 17.143134

---

<sup>a</sup> Institut für Organische Chemie, Universität Regensburg, D-93053 Regensburg, Germany. E-mail: ruth.gschwind@chemie.uni-regensburg.de

<sup>b</sup> Institute of Physical and Theoretical Chemistry, University of Regensburg, D-93053, Germany

|   |           |           |           |
|---|-----------|-----------|-----------|
| H | 13.263549 | 16.439065 | 14.485506 |
| H | 13.790411 | 18.780034 | 14.971496 |
| H | 16.206755 | 13.345862 | 15.702138 |
| H | 14.697919 | 12.407511 | 15.552500 |
| H | 15.055417 | 13.278067 | 17.065789 |
| P | 19.726120 | 18.011149 | 18.114085 |
| O | 19.226384 | 18.449466 | 16.791644 |
| N | 19.704283 | 16.439168 | 18.351236 |
| O | 18.807004 | 18.764718 | 19.218562 |
| O | 21.200409 | 18.542447 | 18.473446 |
| C | 20.288227 | 19.320069 | 21.000543 |
| C | 19.174604 | 18.645698 | 20.554808 |
| C | 18.400522 | 17.791764 | 21.372985 |
| C | 18.833722 | 17.560228 | 22.654340 |
| C | 20.019806 | 18.148914 | 23.147781 |
| C | 20.489067 | 17.859237 | 24.452314 |
| C | 21.657400 | 18.405485 | 24.915535 |
| C | 22.410842 | 19.261996 | 24.085516 |
| C | 21.975580 | 19.573746 | 22.822459 |
| C | 20.762745 | 19.043355 | 22.319549 |
| C | 20.978096 | 20.274707 | 20.095576 |
| C | 21.419717 | 19.859536 | 18.859109 |
| C | 22.087788 | 20.711665 | 17.945140 |
| C | 22.314004 | 22.011527 | 18.329124 |
| C | 21.843262 | 22.514437 | 19.559843 |
| C | 22.009596 | 23.879080 | 19.900283 |
| C | 21.470770 | 24.384638 | 21.053930 |
| C | 20.735979 | 23.541698 | 21.913909 |
| C | 20.575706 | 22.211088 | 21.621569 |
| C | 21.137294 | 21.651361 | 20.448730 |

---

<sup>a</sup> Institut für Organische Chemie, Universität Regensburg, D-93053 Regensburg, Germany. E-mail: ruth.gschwind@chemie.uni-regensburg.de

<sup>b</sup> Institute of Physical and Theoretical Chemistry, University of Regensburg, D-93053, Germany

|   |           |           |           |
|---|-----------|-----------|-----------|
| C | 22.480296 | 20.242568 | 16.598066 |
| C | 17.137264 | 17.198254 | 20.870769 |
| S | 20.535505 | 15.487106 | 19.250130 |
| O | 21.378367 | 16.107733 | 20.247030 |
| O | 19.746043 | 14.350096 | 19.666633 |
| C | 21.741404 | 14.755896 | 18.033671 |
| F | 22.531548 | 13.865891 | 18.648598 |
| F | 21.102119 | 14.131690 | 17.036678 |
| F | 22.516048 | 15.710946 | 17.503905 |
| C | 16.978468 | 15.820474 | 20.787611 |
| C | 15.766010 | 15.279513 | 20.363448 |
| C | 14.700353 | 16.098080 | 20.031755 |
| C | 14.860900 | 17.478458 | 20.120796 |
| C | 16.068135 | 18.028040 | 20.521533 |
| C | 23.173782 | 19.043815 | 16.406093 |
| C | 23.534536 | 18.642850 | 15.129235 |
| C | 23.205065 | 19.411455 | 14.015805 |
| C | 22.518773 | 20.599492 | 14.206833 |
| C | 22.159038 | 21.015355 | 15.485236 |
| C | 13.678644 | 18.354348 | 19.822142 |
| F | 14.006465 | 19.659613 | 19.730313 |
| F | 12.729939 | 18.262432 | 20.785337 |
| F | 13.072419 | 18.017262 | 18.662463 |
| C | 15.642886 | 13.784949 | 20.265480 |
| F | 16.501279 | 13.266224 | 19.356839 |
| F | 14.407359 | 13.386661 | 19.904872 |
| F | 15.924179 | 13.179088 | 21.441788 |
| C | 22.116532 | 21.452665 | 13.037324 |
| F | 22.646689 | 21.030841 | 11.875039 |
| F | 22.493996 | 22.742081 | 13.199850 |

---

<sup>a</sup> Institut für Organische Chemie, Universität Regensburg, D-93053 Regensburg, Germany. E-mail: ruth.gschwind@chemie.uni-regensburg.de

<sup>b</sup> Institute of Physical and Theoretical Chemistry, University of Regensburg, D-93053, Germany

|   |           |           |           |
|---|-----------|-----------|-----------|
| F | 20.771196 | 21.471913 | 12.870487 |
| C | 24.259398 | 17.342080 | 14.921340 |
| F | 23.416167 | 16.354601 | 14.532889 |
| F | 24.876567 | 16.909156 | 16.036333 |
| F | 25.202400 | 17.436047 | 13.957774 |
| H | 18.259729 | 16.912351 | 23.305150 |
| H | 19.909258 | 17.186218 | 25.072190 |
| H | 22.011597 | 18.172967 | 25.911611 |
| H | 23.344971 | 19.672422 | 24.447528 |
| H | 22.569874 | 20.222659 | 22.195872 |
| H | 22.838017 | 22.682685 | 17.660263 |
| H | 22.554740 | 24.519146 | 19.217256 |
| H | 21.592961 | 25.431365 | 21.301176 |
| H | 20.289126 | 23.951140 | 22.810984 |
| H | 20.001569 | 21.582584 | 22.286220 |
| H | 17.808398 | 15.171354 | 21.029385 |
| H | 13.761438 | 15.675291 | 19.705734 |
| H | 16.184642 | 19.100383 | 20.584072 |
| H | 23.439042 | 18.435895 | 17.257174 |
| H | 23.483871 | 19.088610 | 13.023561 |
| H | 21.611256 | 21.938799 | 15.615934 |

---

<sup>a</sup> Institut für Organische Chemie, Universität Regensburg, D-93053 Regensburg, Germany. E-mail: ruth.gschwind@chemie.uni-regensburg.de

<sup>b</sup> Institute of Physical and Theoretical Chemistry, University of Regensburg, D-93053, Germany

*Final energy, structure and Mayer bond orders for the anion structure used for the force field creation*

-----  
Dispersion correction      -0.222525384  
-----

-----  
FINAL SINGLE POINT ENERGY    -4087.914862335938  
-----

-----  
CARTESIAN COORDINATES (ANGSTROEM)  
-----

|   |           |           |           |
|---|-----------|-----------|-----------|
| P | 1.561825  | 0.232380  | 0.403192  |
| O | 2.702716  | -0.633039 | 0.739012  |
| N | 1.866703  | 1.800999  | 0.386125  |
| O | 0.379086  | -0.095533 | 1.469782  |
| O | 0.865888  | -0.093207 | -1.019326 |
| C | -1.650776 | -0.029601 | 0.235309  |
| C | -0.886040 | 0.439070  | 1.281428  |
| C | -1.359678 | 1.401076  | 2.212647  |
| C | -2.590439 | 1.967138  | 1.973612  |
| C | -3.354517 | 1.638699  | 0.834429  |
| C | -4.577872 | 2.298021  | 0.558599  |
| C | -5.302194 | 1.991318  | -0.563281 |
| C | -4.823703 | 1.015224  | -1.462908 |
| C | -3.650251 | 0.349159  | -1.214774 |
| C | -2.887644 | 0.626398  | -0.054210 |
| C | -1.195978 | -1.191888 | -0.570921 |

---

<sup>a</sup> Institut für Organische Chemie, Universität Regensburg, D-93053 Regensburg, Germany. E-mail: ruth.gschwind@chemie.uni-regensburg.de

<sup>b</sup> Institute of Physical and Theoretical Chemistry, University of Regensburg, D-93053, Germany

|   |           |           |           |
|---|-----------|-----------|-----------|
| C | 0.028318  | -1.177326 | -1.202702 |
| C | 0.440715  | -2.184982 | -2.113685 |
| C | -0.398970 | -3.255242 | -2.310870 |
| C | -1.611325 | -3.389300 | -1.600905 |
| C | -2.423553 | -4.540129 | -1.753123 |
| C | -3.579988 | -4.683314 | -1.032228 |
| C | -3.964736 | -3.680550 | -0.117444 |
| C | -3.206792 | -2.547772 | 0.040694  |
| C | -2.018140 | -2.356286 | -0.705470 |
| C | 1.700253  | -2.070712 | -2.886253 |
| C | -0.627623 | 1.731026  | 3.460206  |
| S | 1.238107  | 2.994469  | -0.373960 |
| O | -0.045237 | 2.768187  | -1.002253 |
| O | 1.395655  | 4.220281  | 0.377138  |
| C | 2.401510  | 3.215996  | -1.814481 |
| F | 2.426371  | 2.120059  | -2.584876 |
| F | 2.003679  | 4.250145  | -2.570623 |
| F | 3.649633  | 3.460573  | -1.395361 |
| C | -1.328630 | 1.713099  | 4.670104  |
| C | -0.690185 | 2.018669  | 5.864239  |
| C | 0.661312  | 2.342578  | 5.886117  |
| C | 1.356233  | 2.363625  | 4.685973  |
| C | 0.725171  | 2.066361  | 3.483581  |
| C | 1.670748  | -2.253742 | -4.268784 |
| C | 2.837604  | -2.162019 | -5.019662 |
| C | 4.053378  | -1.884127 | -4.411632 |
| C | 4.082226  | -1.706498 | -3.033795 |
| C | 2.924420  | -1.798156 | -2.272905 |
| C | 2.829444  | 2.662122  | 4.668096  |
| F | 3.249171  | 3.270006  | 5.796549  |

---

<sup>a</sup> Institut für Organische Chemie, Universität Regensburg, D-93053 Regensburg, Germany. E-mail: ruth.gschwind@chemie.uni-regensburg.de

<sup>b</sup> Institute of Physical and Theoretical Chemistry, University of Regensburg, D-93053, Germany



|   |           |           |           |
|---|-----------|-----------|-----------|
| F | 3.176140  | 3.458368  | 3.636056  |
| F | 3.566234  | 1.530363  | 4.542734  |
| C | -1.470210 | 2.040862  | 7.147677  |
| F | -2.561676 | 1.250680  | 7.104453  |
| F | -1.911327 | 3.289574  | 7.445960  |
| F | -0.731766 | 1.638078  | 8.203781  |
| C | 5.374637  | -1.359669 | -2.348990 |
| F | 6.455227  | -1.709560 | -3.077793 |
| F | 5.495670  | -1.963812 | -1.149084 |
| F | 5.479103  | -0.027356 | -2.120623 |
| C | 2.766973  | -2.394425 | -6.501784 |
| F | 1.722703  | -1.750828 | -7.069240 |
| F | 2.607245  | -3.709215 | -6.797920 |
| F | 3.877544  | -1.987285 | -7.145829 |
| H | -2.978305 | 2.709009  | 2.660234  |
| H | -4.922874 | 3.057770  | 1.249548  |
| H | -6.233205 | 2.503586  | -0.769745 |
| H | -5.385802 | 0.794458  | -2.361539 |
| H | -3.293475 | -0.387514 | -1.919560 |
| H | -0.112364 | -4.038565 | -3.001422 |
| H | -2.103986 | -5.309644 | -2.445454 |
| H | -4.192612 | -5.567810 | -1.151276 |
| H | -4.865232 | -3.808892 | 0.469832  |
| H | -3.513202 | -1.794799 | 0.751731  |
| H | -2.374511 | 1.440818  | 4.675154  |
| H | 1.158795  | 2.570382  | 6.817288  |
| H | 1.287222  | 2.116951  | 2.564437  |
| H | 0.727782  | -2.450613 | -4.760767 |
| H | 4.956969  | -1.806178 | -4.996905 |
| H | 2.976617  | -1.661428 | -1.202022 |

---

<sup>a</sup> Institut für Organische Chemie, Universität Regensburg, D-93053 Regensburg, Germany. E-mail: ruth.gschwind@chemie.uni-regensburg.de

<sup>b</sup> Institute of Physical and Theoretical Chemistry, University of Regensburg, D-93053, Germany



Mayer bond orders larger than 0.100000

B( 0-P, 1-O ): 1.9986 B( 0-P, 2-N ): 1.2713 B( 0-P, 3-O ): 1.0469  
B( 0-P, 4-O ): 1.0315 B( 2-N, 27-S ): 1.3392 B( 3-O, 6-C ): 0.9710  
B( 4-O, 16-C ): 0.9236 B( 5-C, 6-C ): 1.4642 B( 5-C, 14-C ): 1.1051  
B( 5-C, 15-C ): 0.8586 B( 6-C, 7-C ): 1.2690 B( 7-C, 8-C ): 1.4547  
B( 7-C, 26-C ): 0.8981 B( 8-C, 9-C ): 1.1987 B( 8-C, 60-H ): 0.9744  
B( 9-C, 10-C ): 1.2088 B( 9-C, 14-C ): 1.2588 B( 10-C, 11-C ): 1.5162  
B( 10-C, 61-H ): 0.9887 B( 11-C, 12-C ): 1.2473 B( 11-C, 62-H ): 0.9822  
B( 12-C, 13-C ): 1.5357 B( 12-C, 63-H ): 0.9791 B( 13-C, 14-C ): 1.2541  
B( 13-C, 64-H ): 0.9649 B( 15-C, 16-C ): 1.4650 B( 15-C, 24-C ): 1.0636  
B( 16-C, 17-C ): 1.2815 B( 17-C, 18-C ): 1.4609 B( 17-C, 25-C ): 0.9059  
B( 18-C, 19-C ): 1.2045 B( 18-C, 65-H ): 0.9842 B( 19-C, 20-C ): 1.2102  
B( 19-C, 24-C ): 1.2651 B( 20-C, 21-C ): 1.5136 B( 20-C, 66-H ): 0.9883  
B( 21-C, 22-C ): 1.2480 B( 21-C, 67-H ): 0.9822 B( 22-C, 23-C ): 1.5365  
B( 22-C, 68-H ): 0.9793 B( 23-C, 24-C ): 1.2546 B( 23-C, 69-H ): 0.9690  
B( 25-C, 39-C ): 1.3667 B( 25-C, 43-C ): 1.3358 B( 26-C, 34-C ): 1.3501  
B( 26-C, 38-C ): 1.3338 B( 27-S, 28-O ): 1.7884 B( 27-S, 29-O ): 1.8262  
B( 27-S, 30-C ): 0.8530 B( 30-C, 31-F ): 1.1099 B( 30-C, 32-F ): 1.1184  
B( 30-C, 33-F ): 1.1177 B( 34-C, 35-C ): 1.3720 B( 34-C, 70-H ): 0.9528  
B( 35-C, 36-C ): 1.3297 B( 35-C, 48-C ): 1.0054 B( 36-C, 37-C ): 1.3312  
B( 36-C, 71-H ): 0.9660 B( 37-C, 38-C ): 1.3988 B( 37-C, 44-C ): 1.0110  
B( 38-C, 72-H ): 0.9042 B( 39-C, 40-C ): 1.3664 B( 39-C, 73-H ): 0.9567  
B( 40-C, 41-C ): 1.3423 B( 40-C, 56-C ): 1.0068 B( 41-C, 42-C ): 1.3265  
B( 41-C, 74-H ): 0.9603 B( 42-C, 43-C ): 1.4048 B( 42-C, 52-C ): 1.0079  
B( 43-C, 75-H ): 0.9156 B( 44-C, 45-F ): 1.1298 B( 44-C, 46-F ): 1.1337  
B( 44-C, 47-F ): 1.1315 B( 48-C, 49-F ): 1.1299 B( 48-C, 50-F ): 1.1402  
B( 48-C, 51-F ): 1.1302 B( 52-C, 53-F ): 1.1264 B( 52-C, 54-F ): 1.1290  
B( 52-C, 55-F ): 1.1316 B( 56-C, 57-F ): 1.1321 B( 56-C, 58-F ): 1.1378  
B( 56-C, 59-F ): 1.1328

<sup>a</sup> Institut für Organische Chemie, Universität Regensburg, D-93053 Regensburg, Germany. E-mail: ruth.gschwind@chemie.uni-regensburg.de

<sup>b</sup> Institute of Physical and Theoretical Chemistry, University of Regensburg, D-93053, Germany



## References

- 1 R. K. Harris, E. D. Becker, S. M. Cabral de Menezes, R. Goodfellow and P. Granger, *Pure Appl. Chem.*, 2001, **73**, 1795.
- 2 F. Löhr, S. G. Mayhew and H. Rüterjans, *J. Am. Chem. Soc.*, 2000, **122**, 9289.
- 3 N. Sorgenfrei, J. Hioe, J. Greindl, K. Rothermel, F. Morana, N. Lokesh and R. M. Gschwind, *J. Am. Chem. Soc.*, 2016, **138**, 16345.
- 4 J. Greindl, J. Hioe, N. Sorgenfrei, F. Morana and R. M. Gschwind, *J. Am. Chem. Soc.*, 2016, **138**, 15965.
- 5 F. H. Westheimer and K. Taguchi, *J. Org. Chem.*, 1971, **36**, 1570.
- 6 J. Barluenga, A. Jiménez-Aquino, F. Aznar and C. Valdés, *J. Am. Chem. Soc.*, 2009, **131**, 4031.
- 7 Y. Schramm, F. Barrios-Landeros and A. Pfaltz, *Chem. Sci.*, 2013, **4**, 2760.
- 8 M. C. Hansen and S. L. Buchwald, *Organic letters*, 2000, **2**, 713.
- 9 J. S. M. Samec and J.-E. Bäckvall, *Chem. Eur. J.*, 2002, **8**, 2955.
- 10 Z. Wang, X. Ye, S. Wei, P. Wu, A. Zhang and J. Sun, *Organic letters*, 2006, **8**, 999.
- 11 J. Hermeke, H. F. T. Klare and M. Oestreich, *Chem. Eur. J.*, 2014, **20**, 9250.
- 12 K. Rothermel, M. Melikian, J. Hioe, J. Greindl, J. Gramüller, M. Žabka, N. Sorgenfrei, T. Hausler, F. Morana and R. M. Gschwind, *Chem. Sci.*, 2019, **10**, 10025.
- 13 K. Rothermel, M. Žabka, J. Hioe and R. M. Gschwind, *J. Org. Chem.*, 2019, **84**, 13221.
- 14 D. Nakashima and H. Yamamoto, *J. Am. Chem. Soc.*, 2006, **128**, 9626.
- 15 A. Franchino, À. Martí and A. M. Echavarren, *J. Am. Chem. Soc.*, 2022, **144**, 3497.
- 16 J.-C. Hierso, *Chem. Rev.*, 2014, **114**, 4838.
- 17 W. D. Arnold and E. Oldfield, *J. Am. Chem. Soc.*, 2000, **122**, 12835.
- 18 F. von Rekowski, C. Koch and R. M. Gschwind, *J. Am. Chem. Soc.*, 2014, **136**, 11389.
- 19 K. Pervushin, A. Ono, C. Fernández, T. Szyperski, M. Kainosho and K. Wüthrich, *PNAS*, 1998, **95**, 14147.
- 20 M. Mishima, M. Hatanaka, S. Yokoyama, T. Ikegami, M. Wälchli, Y. Ito and M. Shirakawa, *J. Am. Chem. Soc.*, 2000, **122**, 5883.
- 21 A. J. Dingley and S. Grzesiek, *J. Am. Chem. Soc.*, 1998, **120**, 8293.
- 22 F. Zhou and H. Yamamoto, *Angew. Chem. Int. Ed.*, 2016, **55**, 8970.

---

<sup>a</sup> Institut für Organische Chemie, Universität Regensburg, D-93053 Regensburg, Germany. E-mail: ruth.gschwind@chemie.uni-regensburg.de

<sup>b</sup> Institute of Physical and Theoretical Chemistry, University of Regensburg, D-93053, Germany

- 23 F. Neese, *WIREs Comput. Mol. Sci.*, 2022, **12**.
- 24 V. Barone and M. Cossi, *J. Phys. Chem. A*, 1998, **102**, 1995.
- 25 T. Lu and F. Chen, *J. Comput. Chem.*, 2012, **33**, 580.
- 26 J. Wang, W. Wang, P. A. Kollman and D. A. Case, *Journal of molecular graphics & modelling*, 2006, **25**, 247.
- 27 J. Wang, R. M. Wolf, J. W. Caldwell, P. A. Kollman and D. A. Case, *J. Comput. Chem.*, 2004, **25**, 1157.
- 28 N. Berg, S. Bergwinkl, P. Nuernberger, D. Horinek and R. M. Gschwind, *J. Am. Chem. Soc.*, 2021, **143**, 724.
- 29 A. W. Da Sousa Silva and W. F. Vranken, *BMC research notes*, 2012, **5**, 367.
- 30 D. van der Spoel, E. Lindahl, B. Hess, G. Groenhof, A. E. Mark and H. J. C. Berendsen, *J. Comput. Chem.*, 2005, **26**, 1701.
- 31 J. S. Hub, B. L. de Groot and D. van der Spoel, *J. Chem. Theory Comput.*, 2010, **6**, 3713.

---

<sup>a</sup> Institut für Organische Chemie, Universität Regensburg, D-93053 Regensburg, Germany. E-mail: ruth.gschwind@chemie.uni-regensburg.de

<sup>b</sup> Institute of Physical and Theoretical Chemistry, University of Regensburg, D-93053, Germany
